# Supplementary material for: From never to daily smoking in 30 months: the predictive value of tobacco and non-tobacco advertising exposure
Source: PubMed Central journal article supplement — BMJ Open. 2013 Jun 11;3(6):e002907. doi: 10.1136/bmjopen-2013-002907 (PMC3686248; doi:10.1136/bmjopen-2013-002907), 2013-06-11
Supplement: bmjopen-2013-002907.draft_revisions.pdf [file bmjopen-2013-002907.draft_revisions.pdf]

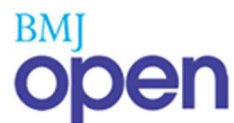

**From never to daily smoking in 30 months: The predictive value of tobacco and non-tobacco advertising exposure**

|                                 |                                                                                                                                                                                                                                                    |
|---------------------------------|----------------------------------------------------------------------------------------------------------------------------------------------------------------------------------------------------------------------------------------------------|
| Journal:                        | <i>BMJ Open</i>                                                                                                                                                                                                                                    |
| Manuscript ID:                  | bmjopen-2013-002907                                                                                                                                                                                                                                |
| Article Type:                   | Research                                                                                                                                                                                                                                           |
| Date Submitted by the Author:   | 18-Mar-2013                                                                                                                                                                                                                                        |
| Complete List of Authors:       | Morgenstern, Matthis; Institute for Therapy and Health Research, Sargent, James; Dartmouth Medical School<br>Isensee, Barbara; Institute for Therapy and Health Research, IFT-Nord, Hanewinkel, Reiner; Institute for Therapy and Health Research, |
| <b>Primary Subject Heading</b>: | Smoking and tobacco                                                                                                                                                                                                                                |
| Secondary Subject Heading:      | Public health                                                                                                                                                                                                                                      |
| Keywords:                       | EPIDEMIOLOGY, PREVENTIVE MEDICINE, PUBLIC HEALTH                                                                                                                                                                                                   |
|                                 |                                                                                                                                                                                                                                                    |

SCHOLARONE™  
Manuscripts

1  
2  
3 **From never to daily smoking in 30 months:**

4  
5 **The predictive value of tobacco and non-tobacco advertising exposure**

6  
7  
8  
9  
10 Matthis Morgenstern, PhD <sup>1,2</sup>

11 James D. Sargent, MD <sup>3</sup>

12  
13 Barbara Isensee, PhD <sup>1</sup>

14  
15 Reiner Hanewinkel, PhD <sup>1,2</sup>

16  
17  
18  
19 <sup>1</sup> Institute for Therapy and Health Research (IFT-Nord)  
20 Harmsstrasse 2  
21 24114 Kiel  
22 Germany

23  
24  
25 <sup>2</sup> Institute for Medical Psychology and Medical Sociology, University Hospital Schleswig-  
26 Holstein, Campus Kiel  
27 Diesterwegstrasse 10-12  
28 24113 Kiel  
29 Germany

30  
31 <sup>3</sup> Geisel School of Medicine at Dartmouth  
32 Cancer Control Research Program  
33 Norris Cotton Cancer Center  
34 Lebanon, NH  
35 USA

36  
37  
38 Corresponding author:  
39 M. Morgenstern  
40 Institute for Therapy and Health Research (IFT-Nord)  
41 Harmsstrasse 2  
42 24114 Kiel  
43 Germany  
44 Phone: +49 431 570 29 35  
45 Fax: +49 431 570 29 29  
46 Mail: morgenstern@ift-nord.de

47  
48  
49  
50 **Keywords:** adolescence • cigarettes • marketing • advertising • longitudinal • Germany

51  
52  
53 Word count (text only): 3275

54  
55 Number of tables: 3

56  
57 Number of figures: 2

## ABSTRACT

**Objective:** To test the specificity of the association between tobacco advertising and youth smoking initiation.

**Design:** Longitudinal survey with a 30-months interval.

**Setting:** Twenty-one public schools in 3 German states.

**Participants:** A total of 1320 sixth- to eighth-grade students who were never-smokers at baseline (age range at baseline, 10-15 years; mean, 12.3 years).

**Exposures:** Exposure to tobacco and non-tobacco advertisements was measured at baseline with images of 6 tobacco and 8 non-tobacco advertisements; students indicated the number of times they had seen each ad and the sum score over all advertisements was used to represent inter-individual differences in the amount of advertising exposure.

**Primary and secondary outcome measures:** Established smoking, defined as smoked >100 cigarettes during the observational period, and daily smoking at follow-up. Secondary outcome measures were any smoking and smoking in the last 30 days.

**Results:** During the observation period 5% of the never smokers at baseline smoked more than 100 cigarettes and 4.4% were classified as daily smokers. After controlling for age, gender, socio-economic status, school performance, television screen time, personality characteristics, and smoking status of peers and parents, each additional 10 tobacco advertising contacts increased the adjusted relative risk for established smoking by 38% (95% confidence interval: 16% - 63%;  $p < 0.001$ ) and for daily smoking by 30% (95% confidence interval: 3% - 64%;  $p < 0.05$ ). No significant association was found for non-tobacco advertising contact.

1  
2  
3 **Conclusions:** The study confirms a content-specific effect of tobacco advertising and  
4 underlines that tobacco advertising exposure is not simply a marker for adolescents that are  
5 generally more receptive or attentive towards marketing.  
6  
7  
8  
9

## 10 11 12 13 **ARTICLE SUMMARY**

### 14 15 **Article focus**

- 16 - High exposure to tobacco advertising might just be an indicator of high advertising  
17 exposure in general.
- 18 - In this study we compare the potential of tobacco advertising vs. non-tobacco  
19 advertising exposure in predicting established and daily smoking of formerly never-  
20 smoking German adolescents.  
21  
22  
23  
24  
25  
26  
27  
28

### 29 30 31 **Key messages**

- 32 - Exposure to tobacco advertisements predicted established smoking and daily  
33 smoking, exposure to non-tobacco advertising did not.
- 34 - The study also shows that advertising allowed under partial bans continues to drive  
35 adolescents to smoke.  
36  
37  
38  
39  
40  
41  
42  
43  
44  
45

### 46 47 **Strengths and limitations of this study**

- 48 - One of few studies that tests the specificity of the association between tobacco  
49 advertising and smoking.
- 50 - Long follow-up period with smoking outcomes that are strongly predictive of  
51 becoming an addicted smoker.
- 52 - A high drop-out rate and attrition bias are limiting factors of this study.  
53  
54  
55  
56  
57  
58  
59  
60

## INTRODUCTION

Tobacco companies were among the first companies to use integrated marketing strategies, and their products have long been among the most heavily marketed products in the United States and worldwide.<sup>1</sup> The tobacco industry still denies that their marketing is targeted at young people. According to the industry the purpose of tobacco advertising is to maintain and increase market shares of adult consumers.<sup>2</sup> In contrast, empirical research indicates that adolescents are aware of, recognize, and are influenced by tobacco marketing strategies. The U.S. Surgeon General's 2012 comprehensive review of the tobacco marketing literature concluded that advertising and promotional activities by tobacco companies are key risk factors for the uptake to smoking in adolescents.<sup>3</sup>

A 2011 Cochrane review identified 19 longitudinal studies that followed up a total of over 29,000 subjects, who were adolescents aged 18 or younger, and were not regular smokers at baseline. In 18 of the 19 studies the nonsmoking adolescents who were more aware of tobacco advertising or receptive to it, were more likely to experiment with cigarettes or become smokers at follow up.<sup>4</sup>

Based on these research results, article 13 of the World Health Organization's (WHO) Framework Convention on Tobacco Control stipulates a comprehensive ban on tobacco advertising, promotion, and sponsorship.<sup>5</sup> A number of countries all over the world follow these recommendations, and have banned tobacco advertisements. However, other countries, such as the United States and Germany, have implemented considerably weaker tobacco marketing policies. Germany has banned tobacco advertisements in television, radio, newspapers, and magazines, but there are still opportunities for the industry to promote their products: Tobacco marketing is allowed at point of sale, on billboards, and in cinemas before movies that show after 6:00 pm. Brand extension, i.e. the use of tobacco brand names for other products, is also allowed.

From a scientific point of view, the best way to study the effects of tobacco marketing would be a randomized controlled trial. But this kind of study design would be both unethical and

1  
2  
3 impractical. Since experimental studies cannot be conducted, we have to rely on  
4  
5 observational studies. Sir Austin Bradford Hill identified several criteria for evaluating  
6  
7 causality in epidemiological studies.<sup>6</sup> According to these criteria the risk factor (e.g. tobacco  
8  
9 marketing) must clearly precede the hypothesized effect (e.g. smoking uptake in young  
10  
11 people). In addition, the association should be strong, consistent, expected from theory, and  
12  
13 specific.

14  
15 The Cochrane review on the effects of tobacco advertising on young people<sup>4</sup> listed our  
16  
17 previous study<sup>7,8</sup> as the only one that tested the specificity of tobacco advertising compared  
18  
19 to advertisements of other consumer goods. According to the review, limitations of this study  
20  
21 included (a) the short nine months follow-up period, and (b) the outcome measure which  
22  
23 defined smoking initiation during the observational period as any smoking including a few  
24  
25 puffs. Clearly, not all adolescents who try smoking will go on to become addicted smokers.  
26  
27 With the current study we present findings from the same cohort, only for a much longer  
28  
29 follow-up period (30 months). The longer follow-up period enables us to study established  
30  
31 and daily smoking as outcomes in young people, outcomes that are more strongly predictive  
32  
33 of becoming an addicted smoker.<sup>9</sup>  
34  
35  
36  
37  
38  
39  
40  
41  
42  
43  
44  
45  
46  
47  
48  
49  
50  
51  
52  
53  
54  
55  
56  
57  
58  
59  
60

## METHODS

### Study sample

In May 2008 we invited 120 randomly selected schools from three states of Germany (Brandenburg, Hamburg, and Schleswig-Holstein) to participate in a school-based survey. The German school system has different types of schools (*Grundschule, Hauptschule, Realschule, Oberschule, Gemeinschaftsschule, Gymnasium*) that mainly differ with regard to the academic skills of their students and graduation level. The selection was stratified by state and type of school, assuring a balanced representation of all school types of the respective states. Twenty-nine schools with 176 classes and 4195 sixth to eighth grade students agreed to participate after a four week recruitment interval. In September and October 2008 we surveyed a total of 174 classes with 3415 students (81.4% of the sampled students). Reasons for exclusion were either absence (2 classes, 134 students) or missing parental consent (646 students). From the 3415 students surveyed at baseline, 2346 were classified as never smokers. Of these, 1320 (56.3%) could be reached again at the follow-up assessment in May/June 2011. Reasons for study drop-out were loss of whole schools due to school changes after sixth grade (7 schools, 14 classes, 194 students), refusal to participate at the follow-up assessment (1 school, 8 classes, 59 students) or class absence (24 classes, 291 students). Other reasons were unexplained absence on the day of data assessment or unmatchable student codes (482 students). The number of analyzed never smokers per school ranged from 3 to 232, class-sizes ranged from 1 to 26.

### Survey implementation

Data were collected through self-completed anonymous questionnaires during one school hour (45 min. period), administered by trained research staff. Only students with written parental consent were qualified for participation, parent consent forms were disseminated by class teachers three weeks prior to the baseline assessment. Students did not receive incentives for participation and irrespective of parental consent all students were free to

1  
2  
3 refuse participation (none refused). Class teachers assigned tasks for students that did not  
4 participate. After completion of the survey, questionnaires were placed in an envelope and  
5 sealed in front of the class. Students were assured that their individual information would not  
6 be seen by parents or teachers. To permit a linking of the baseline and follow-up  
7 questionnaires, students generated an anonymous seven-digit individual code, a procedure  
8 that had been tested in previous studies, slightly modified for this study.<sup>10</sup> Implementation  
9 was approved by all Ministries of Cultural Affairs of the three involved states, and ethical  
10 approval was obtained from the Ethical Committee of the Medical Faculty of the University of  
11 Kiel (Ref.: D 417/08).

## 24 Measures

### 26 *Advertising exposure*

28 Advertising exposure has been operationalized in numerous ways across studies.<sup>4</sup> It has  
29 been measured both in terms of the physical presence of advertisements in individuals'  
30 environments and in terms of the psychological processes underlying individuals' memories  
31 for these advertisements.<sup>11</sup> In the present study we approximated the individual advertising  
32 contact frequency by providing masked colored images of billboard ads for cigarettes and  
33 fixed-images of TV commercials for non-tobacco ads, asking the students to rate how often  
34 they have ever seen each ad extract (on a 4-point scale with scale points 0="Never," 1="1 to  
35 4 times," 2="5 to 10 times" and 3="More than 10 times"). The answers were post-coded as  
36 0=0, 1=2.5, 2=7.5, and 3=11 and summed up to create the tobacco and non-tobacco ad  
37 scales, respectively.

39 The images included six cigarette brands, and eight "control" ads for products that included  
40 sweets, clothes, mobile phones, and cars. The following cigarette brands were included in  
41 the survey (with ad theme or cue in parentheses): (1) Marlboro (cowboy; horses); (2) F6  
42 (sunrise); (3) Gauloises (couple); (4) Pall Mall (Empire State Building); (5) L&M (couple); (6)  
43 Lucky Strike (cigarette packs). These six cigarette brands are among the eight most popular  
44  
45  
46  
47  
48  
49  
50  
51  
52  
53  
54  
55  
56  
57  
58  
59  
60



1  
2  
3 cigarette brands in Germany.<sup>12</sup> For other commercial products, the following ads were  
4 included in the survey (with product type and ad theme or cue in parentheses): (1) Jack  
5 Wolfskin (trekking-clothing; climber); (2) Volkswagen (car; the performer Seal); (3) Tic Tac  
6 (candy; elevator); (4) Dr. Best (tooth brush; tomato); (5) Kinder Pingui (chocolate bar;  
7 penguins); (6) T-Mobile (mobile phone; dog); (7) Spee (detergent; fox); (8) Toyota (car).  
8 Advertising selection was based on a pilot study on 28 tobacco and non-tobacco ads (110  
9 students aged 11 to 16 years, mean age 13.6 years), selecting the half of ads that revealed  
10 neither ceiling nor floor effects and had corrected item-test correlations above  $r_{it}=0.40$ .  
11  
12

13  
14  
15 We assessed ad exposure to non-tobacco products to control for the propensity to be  
16 receptive or attentive to advertising in general, which could confound the relation between  
17 tobacco-specific advertising exposure and smoking behavior.  
18  
19

### 20 21 22 *Smoking behavior*

23  
24  
25 We assessed lifetime smoking experience by asking "How many cigarettes have you smoked  
26 in your life?" (never smoked, just a few puffs, 1-19 cigarettes, 20-100 cigarettes, >100  
27 cigarettes).<sup>13</sup> Students that indicated any smoking at baseline, even just a few puffs, were  
28 excluded from the analysis. Having smoked more than 100 cigarettes at the follow-up  
29 assessment was defined as being an established smoker. Current smoking frequency was  
30 measured by asking, "How often do you smoke at present?" to which respondents could  
31 answer, "I don't smoke," "less than once a month," "at least once a month, but not weekly,"  
32 "at least once a week, but not daily," or "daily." For the present analysis, this variable was  
33 dichotomized into daily and non-daily smoking.  
34  
35  
36  
37  
38  
39  
40  
41  
42  
43  
44  
45  
46  
47  
48  
49  
50

### 51 52 *Covariates*

53  
54  
55 Covariate measures were derived from studies that focus on risk factors of adolescent  
56 tobacco use, to control for confounding variables that would be theoretically related to ad  
57 exposure and the smoking measures.<sup>14-16</sup>  
58  
59  
60

Potential confounders included: (1) Sociodemographics: age, gender, study region, and socioeconomic status (SES); SES of the students was approximated with a combination of student and class teacher ratings: Students answered three items of the PISA cultural and social capital assessment<sup>17</sup>, asking for the number of books in the household (5-point scale from 0 = “None” to 4 = “More than 100”) and parenting characteristics (“My parents always know where I am” and “My parents know other parents from my school”), class teachers filled out an 11-item school evaluation sheet related to SES of their students (examples: “Most students of the school live in families with financial problems”, “Most students of the school come from underprivileged families”, “Our school has a good reputation”, scale range from 0 = “Not true at all” to 3 = “Totally true”, Cronbach’s alpha = 0.85); student and teacher ratings positively correlated  $r = 0.57$ , alpha = 0.72. (2) Personal characteristics: self-reported school performance (“How would you describe your grades last year?”, scale points “excellent”, “good”, “average”, “below average”); average TV screen time (“How many hours do you usually watch TV in your leisure time?”, scale points: “none”, “about half an hour”, “about an hour”, “about two hours”, “about three hours”, “about four hours”, “more than four hours a day”); rebelliousness and sensation-seeking, assessed with four items combined into a single index, with higher scores indicating greater propensity for rebelliousness and sensation seeking<sup>18</sup> (“I get in trouble in school”; “I do things my parents wouldn’t want me to do”; “I like scary things”; “I like to do dangerous things”, scale points 0 = “not at all like me”, 1 = “a little like me”, 2 = “pretty much like me”, and 3 = “exactly like me”, Cronbach’s alpha = 0.76). (3) Social environment: parent smoking (0 = “No”, 1 = “Yes, 2) and peer smoking (0 = “None”, 1 = “Some, 2 = “Most”, 3 = “All”). As mentioned above, we also controlled for the adolescent’s ability to recall advertising in general with the non-tobacco ad scale.

### ***Statistical analysis***

All data analyses were conducted with Stata version 12.0 (Stata Corp, College Station, TX). Chi-squared tests and T-tests were performed to check whether subjects included in the

analysis differed systematically from those not reached at the follow-up assessment. Bivariate associations between the study variables were analyzed using Spearman rank correlations. The multivariate associations between amount of advertising exposure and smoking initiation were analyzed with Poisson regressions. Poisson regression allows for the presentation of adjusted Incidence Rate Ratios (IRRs) and 95% confidence intervals (CIs) for the relationship between exposure to advertising and smoking at follow-up, having the advantage of not being influenced by the prevalence of the exposure. IRRs were calculated for every 10 advertising contacts, indicating the relative increase in smoking incidence (established smoking and daily smoking) for each additional 10 contacts. The dichotomized outcome variables were regressed on advertising exposure after inclusion of all covariates and with clustered robust standard errors to account for intra-class correlations within schools. In a subsequent analysis we repeated the Poisson regressions with advertising contact frequency being parsed into tertiles to account for the skewed distribution of tobacco advertising contact and to replicate the approach used in our previous analysis.<sup>8</sup> Missing data were handled by listwise deletion.

## RESULTS

### Descriptive statistics at baseline and attrition analysis

Table 1 gives descriptive statistics for all interviewed never smokers at baseline, for those lost to follow-up, and the final analyzed sample, allowing comparisons of differences due to attrition. Never smokers lost to follow-up were significantly younger of age, more often male, had lower scores on the SES scale, rated their school performance more poorly, had higher scores in sensation seeking/rebelliousness and more often reported at least one parent who smoked. No differences were found with regard to tobacco or non-tobacco advertising contact.

**Table 1.** Descriptive sample statistics at baseline and attrition analysis.

|  | Baseline never smokers<br>(n=2346) | Lost to follow-up<br>(n=1026) | Analyzed Sample<br>(n=1320) | p |
|--|------------------------------------|-------------------------------|-----------------------------|---|
|  | %                                  | %                             | %                           |   |

|    |                                                            |              |              |              |       |
|----|------------------------------------------------------------|--------------|--------------|--------------|-------|
| 1  |                                                            |              |              |              |       |
| 2  |                                                            |              |              |              |       |
| 3  | Sociodemographics                                          |              |              |              |       |
| 4  | Age at baseline, mean (SD)                                 | 12.24 (1.01) | 12.16 (1.09) | 12.30 (0.93) | .001  |
| 5  | Gender: Female                                             | 54.9         | 51.9         | 57.3         | .008  |
| 6  |                                                            |              |              |              |       |
| 7  | SES: Below Median                                          | 51.1         | 60.6         | 43.8         | <.001 |
| 8  | State                                                      |              |              |              |       |
| 9  | Schleswig-Holstein                                         | 41.6         | 39.8         | 43.0         |       |
| 10 | Hamburg                                                    | 28.4         | 29.1         | 27.8         | .279  |
| 11 | Brandenburg                                                | 30.0         | 31.1         | 29.2         |       |
| 12 | Personal characteristics                                   |              |              |              |       |
| 13 | School performance                                         |              |              |              |       |
| 14 | Below average                                              | 2.5          | 3.7          | 1.5          |       |
| 15 | Average                                                    | 33.7         | 37.8         | 30.6         |       |
| 16 | Good                                                       | 49.9         | 44.9         | 53.9         | <.001 |
| 17 | Excellent                                                  | 13.9         | 13.6         | 14.0         |       |
| 18 |                                                            |              |              |              |       |
| 19 | TV screen time                                             |              |              |              |       |
| 20 | ≤ 30 min                                                   | 16.8         | 15.5         | 17.8         |       |
| 21 | 1-2 h                                                      | 59.5         | 58.8         | 60.1         |       |
| 22 | 3-4 h                                                      | 19.0         | 19.8         | 18.3         | .051  |
| 23 | > 4 h                                                      | 4.7          | 5.9          | 3.8          |       |
| 24 |                                                            |              |              |              |       |
| 25 | Sensation seeking and rebelliousness, mean (SD), range 0-3 | 0.53 (0.50)  | 0.56 (0.51)  | 0.50 (0.49)  | .010  |
| 26 |                                                            |              |              |              |       |
| 27 | Social environment                                         |              |              |              |       |
| 28 | Peer smoking: None                                         | 71.7         | 71.5         | 71.9         | .858  |
| 29 | Parent smoking: No                                         | 53.3         | 49.3         | 56.4         | .001  |
| 30 | Advertising exposure                                       |              |              |              |       |
| 31 | Tobacco advertising                                        |              |              |              |       |
| 32 | Low                                                        | 35.3         | 35.3         | 35.4         |       |
| 33 | Medium                                                     | 38.7         | 39.7         | 38.0         | .600  |
| 34 | High                                                       | 26.0         | 25.0         | 26.6         |       |
| 35 | Non-tobacco advertising                                    |              |              |              |       |
| 36 | Low                                                        | 39.8         | 40.8         | 39.0         |       |
| 37 | Medium                                                     | 32.1         | 32.4         | 32.0         | .469  |
| 38 | High                                                       | 28.1         | 26.8         | 29.0         |       |
| 39 |                                                            |              |              |              |       |
| 40 |                                                            |              |              |              |       |
| 41 |                                                            |              |              |              |       |
| 42 |                                                            |              |              |              |       |
| 43 |                                                            |              |              |              |       |
| 44 |                                                            |              |              |              |       |
| 45 |                                                            |              |              |              |       |
| 46 |                                                            |              |              |              |       |
| 47 |                                                            |              |              |              |       |
| 48 |                                                            |              |              |              |       |
| 49 |                                                            |              |              |              |       |
| 50 |                                                            |              |              |              |       |
| 51 |                                                            |              |              |              |       |
| 52 |                                                            |              |              |              |       |
| 53 |                                                            |              |              |              |       |
| 54 |                                                            |              |              |              |       |
| 55 | <b>Smoking initiation during the observational period</b>  |              |              |              |       |
| 56 |                                                            |              |              |              |       |
| 57 |                                                            |              |              |              |       |
| 58 |                                                            |              |              |              |       |
| 59 |                                                            |              |              |              |       |
| 60 |                                                            |              |              |              |       |

1  
2  
3 Thirty months after the baseline assessment 436 never smokers reported trying cigarette  
4 smoking including a few puffs (33% incidence rate), 138 reported smoking in the past 30  
5 days (10.5% incidence rate), Sixty-six had smoked more than 100 cigarettes and were  
6 classified as established smokers (incidence rate 5%), and 58 reported daily smoking  
7 (incidence rate 4.4%). Daily smoking incidence was not significantly related to age ( $p=0.526$ )  
8 or sex ( $p=0.153$ ), with 33% of the daily smokers at follow-up being 14 years of age or  
9 younger and 24% being 16 or older.  
10  
11  
12  
13  
14  
15  
16  
17  
18  
19  
20

### 21 **Exposure to advertisements at baseline**

22  
23  
24 Table 2 gives contact frequencies (how often the students had seen the ad) for all advertised  
25 products at baseline. The cigarette ad with the highest contact frequency was Lucky Strike,  
26 for which about half of the sample reported at least one contact. The lowest tobacco ad  
27 contact frequency rate was found for F6, a regional German cigarette brand sold mainly in  
28 eastern Germany. Ad contact frequency for non-tobacco products was generally much higher  
29 than for tobacco products. For example, almost all students (98%) reported having seen the  
30 ad for Kinder Pingui, a chocolate bar. The range of the sum of contacts over all depicted  
31 advertisements was 0 to 55 (mean=7.9) for the tobacco ads, and 0 to 88 (mean=42.2) for the  
32 non-tobacco ads.  
33  
34  
35  
36  
37  
38  
39  
40  
41  
42  
43

44 **Table 2.** Contact frequency for tobacco and non-tobacco advertisings  
45 (n = 1320 never smokers at baseline)  
46

|                                   | Seen at least<br>once | Seen more than<br>10 times |
|-----------------------------------|-----------------------|----------------------------|
|                                   | %                     | %                          |
| <b>Tobacco ads (product type)</b> |                       |                            |
| Lucky Strike (cigarettes)         | 49                    | 13                         |
| Marlboro (cigarettes)             | 28                    | 6                          |
| Pall Mall (cigarettes)            | 24                    | 6                          |
| Gauloises (cigarettes)            | 19                    | 2                          |
| L&M (cigarettes)                  | 18                    | 4                          |

**Table 2.** Contact frequency for tobacco and non-tobacco advertisings  
(n = 1320 never smokers at baseline)

|                                       |    |    |
|---------------------------------------|----|----|
| F6 (cigarettes)                       | 12 | 1  |
| <b>Non-tobacco ads (product type)</b> |    |    |
| Kinder Pingui (sweet)                 | 96 | 71 |
| Tic Tac (candy)                       | 87 | 44 |
| Dr. Best (tooth brush)                | 83 | 36 |
| T-Mobile (mobile phone)               | 85 | 35 |
| Spee (detergent)                      | 76 | 24 |
| Volkswagen (car)                      | 50 | 14 |
| Toyota (car)                          | 54 | 10 |
| Jack Wolfskin (trekking-clothing)     | 45 | 9  |

### Zero order associations

Table 3 shows pairwise Spearman rank correlations between the study variables, demonstrating significant crude associations between the assessed covariates and smoking behavior as well as between covariates and advertising contact, justifying their inclusion in the multivariate analyses. The highest correlations with all smoking outcomes was found for peer smoking, followed by tobacco advertising contact. There were some differences in the correlational pattern between tobacco and non-tobacco advertising contact. Compared to the amount of contact with tobacco ads, non-tobacco advertising exposure was stronger related to age and showed no association with gender, and also had a stronger correlation with SES, TV screen time, and parental smoking. The zero-order correlation between tobacco and non-tobacco advertising contact indicated a proportion of about 20% shared variance.

**Table 3.** Zero-order correlation matrix for all study variables.

|                                 | 1.             | 2.             | 3.              | 4.             | 5.             | 6.             | 7.             | 8.             | 9.             | 10.            | 11.            | 12.            | 13.            | 14.            |
|---------------------------------|----------------|----------------|-----------------|----------------|----------------|----------------|----------------|----------------|----------------|----------------|----------------|----------------|----------------|----------------|
| 1. Age                          | 1.00           |                |                 |                |                |                |                |                |                |                |                |                |                |                |
| 2. Gender<br>(0=female, 1=male) | 0.02           | 1.00           |                 |                |                |                |                |                |                |                |                |                |                |                |
| 3. SES                          | <b>-0.07*</b>  | 0.02           | 1.00            |                |                |                |                |                |                |                |                |                |                |                |
| 4. Region<br>(0=west, 1=east)   | <b>0.25***</b> | -0.01          | <b>-0.10*</b>   | 1.00           |                |                |                |                |                |                |                |                |                |                |
| 5. School<br>performance        | <b>0.11***</b> | 0.03           | <b>-0.16***</b> | -0.05          | 1.00           |                |                |                |                |                |                |                |                |                |
| 6. TV screen time               | <b>0.17***</b> | <b>0.07**</b>  | <b>-0.30***</b> | <b>0.25***</b> | <b>0.15***</b> | 1.00           |                |                |                |                |                |                |                |                |
| 7. Sensation seeking            | <b>0.09***</b> | <b>0.24***</b> | -0.03           | 0.01           | <b>0.16***</b> | <b>0.18***</b> | 1.00           |                |                |                |                |                |                |                |
| 8. Peer smoking                 | <b>0.28***</b> | 0.02           | <b>-0.22***</b> | <b>0.28***</b> | <b>0.15***</b> | <b>0.24***</b> | <b>0.24***</b> | 1.00           |                |                |                |                |                |                |
| 9. Parent smoking               | 0.04           | -0.02          | <b>-0.26***</b> | <b>0.09***</b> | <b>0.11**</b>  | <b>0.22***</b> | <b>0.08**</b>  | <b>0.17***</b> | 1.00           |                |                |                |                |                |
| 10. Tobacco ad<br>exposure      | <b>0.14***</b> | <b>0.13***</b> | 0.02            | <b>-0.06*</b>  | 0.05           | <b>0.11**</b>  | <b>0.24***</b> | <b>0.13***</b> | <b>0.08**</b>  | 1.00           |                |                |                |                |
| 11. Non-tobacco ad<br>exposure  | <b>0.20***</b> | 0.05           | <b>-0.08**</b>  | <b>0.11**</b>  | <b>0.06*</b>   | <b>0.36***</b> | <b>0.21***</b> | <b>0.18***</b> | <b>0.18***</b> | <b>0.44***</b> | 1.00           |                |                |                |
| 12. Ever smoking                | <b>0.15***</b> | 0.01           | <b>-0.17***</b> | <b>0.14***</b> | <b>0.09**</b>  | <b>0.14***</b> | <b>0.18***</b> | <b>0.24***</b> | <b>0.13***</b> | <b>0.19***</b> | <b>0.15***</b> | 1.00           |                |                |
| 13. Past 30 days<br>smoking     | <b>0.09**</b>  | -0.02          | <b>-0.12**</b>  | <b>0.08**</b>  | <b>0.06*</b>   | <b>0.12**</b>  | <b>0.15***</b> | <b>0.21***</b> | <b>0.14***</b> | <b>0.17***</b> | <b>0.12***</b> | <b>0.61***</b> | 1.00           |                |
| 14. Established<br>smoking      | <b>0.07*</b>   | <b>0.09**</b>  | <b>-0.07*</b>   | <b>0.08**</b>  | 0.05           | <b>0.10*</b>   | <b>0.12**</b>  | <b>0.16***</b> | <b>0.09***</b> | <b>0.13***</b> | <b>0.09**</b>  | <b>0.33***</b> | <b>0.51***</b> | 1.00           |
| 15. Daily smoking               | 0.02           | 0.04           | <b>-0.14***</b> | <b>0.08**</b>  | <b>0.07*</b>   | <b>0.10*</b>   | <b>0.09**</b>  | <b>0.14***</b> | <b>0.13***</b> | <b>0.08**</b>  | 0.03           | <b>0.30***</b> | <b>0.49***</b> | <b>0.75***</b> |

### Association between advertising contact and smoking initiation

Figures 1a and 1b show the adjusted predictions of established smoking and daily smoking based on the amount of tobacco and non-tobacco advertising contact. The curves illustrate an increasing risk for the two smoking outcomes dependent on the amount of tobacco ad contact, but not for non-tobacco advertising contact.

Insert Figures 1a and 1b about here

The Figures also report the adjusted incidence rate ratios associated with an increase in advertising exposure. There was an adjusted IRR for established smoking of 1.38 (95% CI 1.16, 1.63;  $p < .001$ ) for each additional 10 tobacco ad contacts and 1.00 (95% CI 0.84, 1.19;  $p = 0.996$ ) for each additional 10 non-tobacco ad contacts. For daily smoking, the corresponding IRRs were 1.30 (95% CI 1.03, 1.64;  $p = 0.029$ ) for 10 tobacco ad contacts and 0.92 (95% CI 0.79, 1.08;  $p = 0.296$ ) for 10 non-tobacco ad contacts, respectively.

Due to the skewed distribution of tobacco ad contact frequency (more than half of the never-smoking students had fewer than 10 contacts), we repeated the analysis using contact frequency parsed into tertiles, representing relative low (0-2.5), medium (5-10), and high (11-55) advertising contact. For established smoking the adjusted IRRs were 1.52 for tobacco ads (95% CI 1.14, 2.03;  $p = 0.004$ ) and 1.05 for non-tobacco ads (95% CI 0.68, 1.62;  $p = 0.819$ ). Using daily smoking as outcome variable the IRRs were 1.43 (95% CI 1.08, 1.90;  $p = 0.012$ ) and 0.84 (95% CI 0.58, 1.22;  $p = 0.363$ ) for each additional tertile of tobacco and non-tobacco advertising contact. These IRRs relate to 3.1%, 4.8%, and 7.3% established smoking attributable incidence rate or 3.1%, 4.6%, and 6.4% daily smoking incidence for low, medium, and high tobacco advertising contact, respectively, assuming the adjusted analysis adequately controlled for third variable influence.



## DISCUSSION

This longitudinal study is a further test of the relationship between tobacco advertising exposure and youth smoking behavior, confirming the specificity of the advertising-smoking link by comparing the effects of tobacco versus non-tobacco advertising. The study extends previous work by using two less prevalent outcome measures (established and daily smoking) and a longer follow-up period of 2.5 years, measures likely to indicate an addiction component to the smoking.<sup>19</sup> Specificity was shown by the finding that tobacco advertising at baseline predicted these outcomes independent of the amount of general advertising contact and after controlling for a number of well-known risk factors for smoking initiation. This result confirms the content-specific effect of tobacco advertising and underlines that tobacco advertising exposure is not simply a marker for adolescents that are generally more receptive or attentive towards marketing.

This longitudinal study also clearly points out the implications of partial tobacco advertising bans in countries like the United States and Germany. The one-third of adolescents in the highest tertile of advertising had rates of daily and established smoking that were double (3 percentage points higher) than adolescents in the first tertile. In reverse, assuming that the models were fully adjusted for other confounding influences, one might expect a significant further decrease in the rates of smoking in these countries after a total elimination of tobacco advertising.

Some limitations of the study have to be considered. There was a severe loss of students during the 30 months interval (44%). To a large degree the drop-out was due to organizational issues (e.g., school and class changes) that are unlikely systematically related to advertising exposure or smoking behavior on the individual level. However, the lost students differed on a couple of dimensions from the retained students, i.e., age, gender, socio-economic status, school performance, sensation seeking, and parental smoking. With

1  
2  
3 the exception of the lower age, the drop-out markers indicate that lower risk adolescents  
4  
5 were more likely to be retained. This might have biased the results as the effect of specific  
6  
7 risk factors (e.g., advertising exposure) might not be independent of other risk factors.  
8  
9 Second, as with any observational study, the results may be biased by unmeasured  
10  
11 confounding – that is, an unmeasured risk factor could alter the estimates reported for the  
12  
13 association between tobacco advertising and smoking onset. Third, the memory-based  
14  
15 measure of ad exposure could be biased by memory effects other than the ones we  
16  
17 controlled for. The potential to memorize ads (in terms of contact frequency) should,  
18  
19 however, not be completely independent of actual exposure. Finally, because the  
20  
21 implemented method did not use a representative sample of all broadcasted ads, it does not  
22  
23 allow for an accurate estimation of the total amount of tobacco and non-tobacco advertising  
24  
25 exposure or the advertising pressure of specific brands.  
26  
27

28  
29 The finding that exposure to tobacco advertising predicts smoking in youth could have  
30  
31 important public health implications. A total ban of tobacco advertising and promotion around  
32  
33 the world is one key policy measure of WHO Framework Convention on Tobacco Control  
34  
35 (FCTC)<sup>20</sup>. Under Article 13.1 of the FCTC, 'Parties recognize that a comprehensive ban on  
36  
37 advertising, promotion and sponsorship would reduce the consumption of tobacco products'.  
38  
39 Data from this study support this measure, because only exposure to tobacco  
40  
41 advertisements predicted smoking initiation, which cannot be attributed to a general  
42  
43 receptiveness to marketing and because it shows that advertising allowed under partial bans  
44  
45 continues to drive adolescents to smoke.  
46  
47  
48  
49  
50  
51  
52  
53  
54  
55  
56  
57  
58  
59  
60

## STATEMENTS

### Licence

The Corresponding Author has the right to grant on behalf of all authors and does grant on behalf of all authors, an exclusive licence (or non-exclusive for government employees) on a worldwide basis to the BMJ Group and co-owners or contracting owning societies (where published by the BMJ Group on their behalf), and its Licensees to permit this article (if accepted) to be published in BMJ and any other BMJ Group products and to exploit all subsidiary rights, as set out in our licence.

### Funding

This study was financed by DAK-Gesundheit, a German health insurance firm.

### Acknowledgement

We like to thank Mandy Gauditz, Lars Grabbe, Sven Heid, Frank Kirschneck, Carmen and Sarah Koynowski, Detlef Kraut, Corinna Liefeld, Karin Maruska, Danuta Meinhardt, Marc Räder, Jan Sängler, and Gesa Sander for assessing the data.

### Competing interests:

None.

### Contributors:

Conception and design of the study: All authors

Analysis and interpretation of data: MM, RH

1  
2  
3 Collection and assembly of data: MM, BI

4  
5 Drafting of the article: MM, JS, RH

6  
7 Critical revision of the article for important intellectual content: All authors

8  
9 Final approval of the article: All authors

10  
11  
12  
13  
14 All authors have full access to all of the data (including statistical reports and tables) in the  
15 study and can take responsibility for the integrity of the data and the accuracy of the data  
16 analysis.  
17  
18

19  
20  
21  
22  
23 Study implementation was approved by the Ethical Committee of the Medical Faculty of the  
24 University of Kiel (Ref.: D 417/08).  
25  
26

27  
28  
29  
30 **Data sharing:** No additional data available.  
31  
32  
33  
34  
35  
36  
37  
38  
39  
40  
41  
42  
43  
44  
45  
46  
47  
48  
49  
50  
51  
52  
53  
54  
55  
56  
57  
58  
59  
60

## REFERENCES

- (1) Brandt AM. The cigarette century: The rise, fall and deadly persistence of the product that defined America. New York, NY: Basic Books; 2007.
- (2) Pollay RW. Targeting youth and concerned smokers: evidence from Canadian tobacco industry documents. *Tob Control* 2000; 9(2):136-147.
- (3) U.S. Department of Health and Human Services. Preventing tobacco use among youth and young adults: A report of the Surgeon General. Atlanta, GA: U.S. Department of Health and Human Services, Centers for Disease Control and Prevention, National Center for Chronic Disease Prevention and Health Promotion, Office on Smoking and Health; 2012.
- (4) Lovato C, Watts A, Stead LF. Impact of tobacco advertising and promotion on increasing adolescent smoking behaviours. *Cochrane Database Syst Rev* 2011;(10):CD003439.
- (5) Henriksen L. Comprehensive tobacco marketing restrictions: promotion, packaging, price and place. *Tob Control* 2012; 21(2):147-153.
- (6) Hill AB. The environment and disease: association or causation? *Proc R Soc Med* 1965; 58:295-300.
- (7) Hanewinkel R, Isensee B, Sargent JD, Morgenstern M. Cigarette advertising and adolescent smoking. *Am J Prev Med* 2010; 38(4):359-366.
- (8) Hanewinkel R, Isensee B, Sargent JD, Morgenstern M. Cigarette advertising and teen smoking initiation. *Pediatrics* 2011; 127(2):e271-e278.
- (9) Kenford SL, Wetter DW, Welsch SK, Smith SS, Fiore MC, Baker TB. Progression of college-age cigarette samplers: what influences outcome. *Addict Behav* 2005; 30(2):285-294.
- (10) Galanti MR, Siliquini R, Cuomo L, Melero JC, Panella M, Faggiano F. Testing anonymous link procedures for follow-up of adolescents in a school-based trial: The EU-DAP pilot study. *Prev Med* 2007; 44(2):174-177.
- (11) Klitzner M, Gruenewald PJ, Bamberger E. Cigarette advertising and adolescent experimentation with smoking. *Br J Addict* 1991; 86(3):287-298.
- (12) Deutsches Krebsforschungszentrum. The Tobacco Atlas Germany 2009. Heidelberg: Deutsches Krebsforschungszentrum (in German); 2009.
- (13) Bondy SJ, Victor JC, Diemert LM. Origin and use of the 100 cigarette criterion in tobacco surveys. *Tob Control* 2009; 18(4):317-323.
- (14) Gibbons FX, Gerrard M. Predicting young adults' health risk behavior. *J Pers Soc Psychol* 1995; 69(3):505-517.

- 1  
2  
3 (15) Hawkins JD, Catalano RF, Miller JY. Risk and protective factors for alcohol and other  
4 drug problems in adolescence and early adulthood: implications for substance abuse  
5 prevention. *Psychol Bull* 1992; 112(1):64-105.  
6  
7 (16) Petraitis J, Flay BR, Miller TQ. Reviewing theories of adolescent substance use:  
8 organizing pieces in the puzzle. *Psychol Bull* 1995; 117(1):67-86.  
9  
10 (17) Kunter M, Schümer G, Artelt C, Baumert J, Klieme E, Neubrand M et al. Pisa 2000:  
11 Dokumentation der Erhebungsinstrumente (Pisa 2000: Documentation of measures).  
12 Berlin: Max-Planck-Institut für Bildungsforschung (in German); 2002.  
13  
14 (18) Russo MF, Stokes GS, Lahey BB, Christ MAG, McBurnett K, Loeber R et al. A  
15 sensation seeking scale for children: Further refinement and psychometric  
16 development. *J Psychopathol Behav Assess* 1993; 15:69-85.  
17  
18 (19) Heatherton TF, Kozlowski LT, Frecker RC, Rickert W, Robinson J. Measuring the  
19 heaviness of smoking: using self-reported time to the first cigarette of the day and  
20 number of cigarettes smoked per day. *Br J Addict* 1989; 84(7):791-799.  
21  
22 (20) Shibuya K, Ciecierski C, Guindon E, Bettcher DW, Evans DB, Murray CJ. WHO  
23 Framework Convention on Tobacco Control: development of an evidence based  
24 global public health treaty. *BMJ* 2003; 327(7407):154-157.  
25  
26  
27  
28  
29  
30  
31  
32  
33  
34  
35  
36  
37  
38  
39  
40  
41  
42  
43  
44  
45  
46  
47  
48  
49  
50  
51  
52  
53  
54  
55  
56  
57  
58  
59  
60

1  
2  
3 **Figure legend**  
4  
5  
6  
7

8 **Figures 1a and 1b**

9 ----- Tobacco advertising      — Non-tobacco advertising  
10

11 IRR = Incidence Rate Ratio for 10 additional advertising contacts

12 Figures in brackets = 95% Confidence Interval

13 n.s. = not significant; \* $p < .05$ ; \*\*\* $p < .001$   
14  
15  
16  
17  
18  
19  
20  
21  
22  
23  
24  
25  
26  
27  
28  
29  
30  
31  
32  
33  
34  
35  
36  
37  
38  
39  
40  
41  
42  
43  
44  
45  
46  
47  
48  
49  
50  
51  
52  
53  
54  
55  
56  
57  
58  
59  
60

1  
2  
3  
4  
5  
6  
7  
8  
9  
10  
11  
12  
13  
14  
15  
16  
17  
18  
19  
20  
21  
22  
23  
24  
25  
26  
27  
28  
29  
30  
31  
32  
33  
34  
35  
36  
37  
38  
39  
40  
41  
42  
43  
44  
45  
46  
47  
48  
49  
50  
51  
52  
53  
54  
55  
56  
57  
58  
59  
60

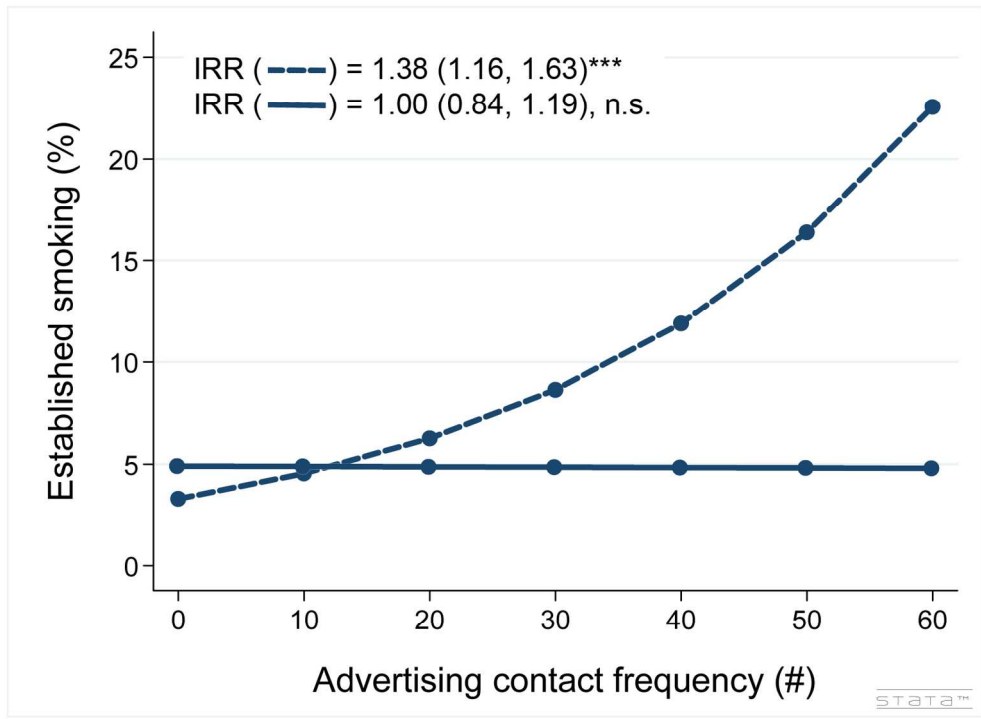

143x104mm (300 x 300 DPI)

View only



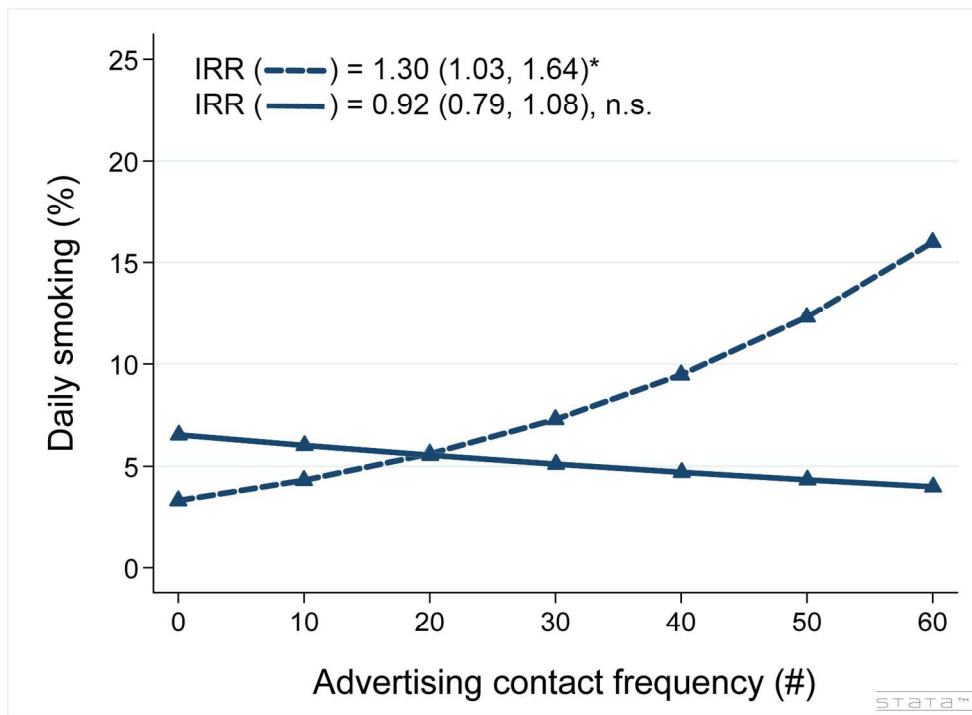

143x104mm (300 x 300 DPI)

view only

**STROBE statement**

Manuscript entitled "From never to daily smoking in 30 months:  
The predictive value of tobacco and non-tobacco advertising exposure"

|                           | Item No | Recommendation                                                                                                                                                                       | Manuscript page |
|---------------------------|---------|--------------------------------------------------------------------------------------------------------------------------------------------------------------------------------------|-----------------|
| <b>Title and abstract</b> |         |                                                                                                                                                                                      |                 |
|                           | 1       | (a) Indicate the study's design with a commonly used term in the title or the abstract                                                                                               | 2               |
|                           |         | (b) Provide in the abstract an informative and balanced summary of what was done and what was found                                                                                  | 2               |
| <b>Introduction</b>       |         |                                                                                                                                                                                      |                 |
| Background/rationale      | 2       | Explain the scientific background and rationale for the investigation being reported                                                                                                 | 4               |
| Objectives                | 3       | State specific objectives, including any prespecified hypotheses                                                                                                                     | 4, 5            |
| <b>Methods</b>            |         |                                                                                                                                                                                      |                 |
| Study design              | 4       | Present key elements of study design early in the paper                                                                                                                              | 6               |
| Setting                   | 5       | Describe the setting, locations, and relevant dates, including periods of recruitment, exposure, follow-up, and data collection                                                      | 6               |
| Participants              | 6       | (a) Give the eligibility criteria, and the sources and methods of selection of participants. Describe methods of follow-up                                                           | 6               |
| Variables                 | 7       | Clearly define all outcomes, exposures, predictors, potential confounders, and effect modifiers. Give diagnostic criteria, if applicable                                             | 7,8,9           |
| Data sources/measurement  | 8*      | For each variable of interest, give sources of data and details of methods of assessment (measurement). Describe comparability of assessment methods if there is more than one group | 7,8,9           |
| Bias                      | 9       | Describe any efforts to address potential sources of bias                                                                                                                            | 9               |
| Study size                | 10      | Explain how the study size was arrived at                                                                                                                                            | 6               |
| Quantitative variables    | 11      | Explain how quantitative variables were handled in the analyses. If applicable, describe which groupings were chosen and why                                                         | 7-9             |
|                           |         | (a) Describe all statistical methods, including those used to control for confounding                                                                                                | 9, 10           |
|                           |         | (b) Describe any methods used to examine subgroups and interactions                                                                                                                  | n/a             |
| Statistical methods       | 12      | (c) Explain how missing data were addressed                                                                                                                                          | 10              |
|                           |         | (d) If applicable, explain how loss to follow-up was addressed                                                                                                                       | 10              |
|                           |         | (e) Describe any sensitivity analyses                                                                                                                                                | 10              |

| <b>Results</b>           |     |                                                                                                                                                                                                              |                       |
|--------------------------|-----|--------------------------------------------------------------------------------------------------------------------------------------------------------------------------------------------------------------|-----------------------|
| Participants             | 13* | (a) Report numbers of individuals at each stage of study? eg numbers potentially eligible, examined for eligibility, confirmed eligible, included in the study, completing follow-up, and analysed           | 6                     |
|                          |     | (b) Give reasons for non-participation at each stage                                                                                                                                                         | 6                     |
|                          |     | (c) Consider use of a flow diagram                                                                                                                                                                           | --                    |
| Descriptive data         | 14* | (a) Give characteristics of study participants (eg demographic, clinical, social) and information on exposures and potential confounders                                                                     | Table 1               |
|                          |     | (b) Indicate number of participants with missing data for each variable of interest                                                                                                                          | Table 1               |
|                          |     | (c) Summarise follow-up time (eg, average and total amount)                                                                                                                                                  | 6                     |
| Outcome data             | 15* | Report numbers of outcome events or summary measures over time                                                                                                                                               | 10                    |
| Main results             | 16  | (a) Give unadjusted estimates and, if applicable, confounder-adjusted estimates and their precision (eg, 95% confidence interval). Make clear which confounders were adjusted for and why they were included | 8, 13, 15<br>Figure 1 |
|                          |     | (b) Report category boundaries when continuous variables were categorized                                                                                                                                    | 15                    |
|                          |     | (c) If relevant, consider translating estimates of relative risk into absolute risk for a meaningful time period                                                                                             | --                    |
| Other analyses           | 17  | Report other analyses done? eg analyses of subgroups and interactions, and sensitivity analyses                                                                                                              | --                    |
| <b>Discussion</b>        |     |                                                                                                                                                                                                              |                       |
| Key results              | 18  | Summarise key results with reference to study objectives                                                                                                                                                     | 16                    |
| Limitations              | 19  | Discuss limitations of the study, taking into account sources of potential bias or imprecision. Discuss both direction and magnitude of any potential bias                                                   | 16,17                 |
| Interpretation           | 20  | Give a cautious overall interpretation of results considering objectives, limitations, multiplicity of analyses, results from similar studies, and other relevant evidence                                   | 16,17                 |
| Generalisability         | 21  | Discuss the generalisability (external validity) of the study results                                                                                                                                        | 17                    |
| <b>Other information</b> |     |                                                                                                                                                                                                              |                       |
| Funding                  | 22  | Give the source of funding and the role of the funders for the present study and, if applicable, for the original study on which the present article is based                                                | 18                    |



**From never to daily smoking in 30 months: The predictive value of tobacco and non-tobacco advertising exposure**

|                                 |                                                                                                                                                                                                                                                    |
|---------------------------------|----------------------------------------------------------------------------------------------------------------------------------------------------------------------------------------------------------------------------------------------------|
| Journal:                        | <i>BMJ Open</i>                                                                                                                                                                                                                                    |
| Manuscript ID:                  | bmjopen-2013-002907.R1                                                                                                                                                                                                                             |
| Article Type:                   | Research                                                                                                                                                                                                                                           |
| Date Submitted by the Author:   | 18-Apr-2013                                                                                                                                                                                                                                        |
| Complete List of Authors:       | Morgenstern, Matthis; Institute for Therapy and Health Research, Sargent, James; Dartmouth Medical School<br>Isensee, Barbara; Institute for Therapy and Health Research, IFT-Nord, Hanewinkel, Reiner; Institute for Therapy and Health Research, |
| <b>Primary Subject Heading</b>: | Smoking and tobacco                                                                                                                                                                                                                                |
| Secondary Subject Heading:      | Public health                                                                                                                                                                                                                                      |
| Keywords:                       | EPIDEMIOLOGY, PREVENTIVE MEDICINE, PUBLIC HEALTH                                                                                                                                                                                                   |
|                                 |                                                                                                                                                                                                                                                    |

SCHOLARONE™  
Manuscripts

1  
2  
3 **From never to daily smoking in 30 months:**

4  
5 **The predictive value of tobacco and non-tobacco advertising exposure**

6  
7  
8  
9 Matthis Morgenstern, PhD <sup>1,2</sup>

10  
11 James D. Sargent, MD <sup>3</sup>

12  
13 Barbara Isensee, PhD <sup>1</sup>

14  
15 Reiner Hanewinkel, PhD <sup>1,2</sup>

16  
17  
18  
19 <sup>1</sup> Institute for Therapy and Health Research (IFT-Nord)  
20 Harmsstrasse 2  
21 24114 Kiel  
22 Germany

23  
24  
25 <sup>2</sup> Institute for Medical Psychology and Medical Sociology, University Medical Center  
26 Schleswig-Holstein, Campus Kiel  
27 Diesterwegstrasse 10-12  
28 24113 Kiel  
29 Germany

30  
31 <sup>3</sup> Geisel School of Medicine at Dartmouth  
32 Cancer Control Research Program  
33 Norris Cotton Cancer Center  
34 Lebanon, NH  
35 USA

36  
37  
38 Corresponding author:  
39 M. Morgenstern  
40 Institute for Therapy and Health Research (IFT-Nord)  
41 Harmsstrasse 2  
42 24114 Kiel  
43 Germany  
44 Phone: +49 431 570 29 35  
45 Fax: +49 431 570 29 29  
46 Mail: morgenstern@ift-nord.de

47  
48  
49  
50 **Keywords:** adolescence • cigarettes • marketing • advertising • longitudinal • Germany

51  
52  
53 Word count (text only): 3589

54  
55 Number of tables: 3

56  
57 Number of figures: 2

## ABSTRACT

**Objective:** To test the specificity of the association between tobacco advertising and youth smoking initiation.

**Design:** Longitudinal survey with a 30-months interval.

**Setting:** Twenty-one public schools in 3 German states.

**Participants:** A total of 1320 sixth- to eighth-grade students who were never-smokers at baseline (age range at baseline, 10-15 years; mean, 12.3 years).

**Exposures:** Exposure to tobacco and non-tobacco advertisements was measured at baseline with images of 6 tobacco and 8 non-tobacco advertisements; students indicated the number of times they had seen each ad and the sum score over all advertisements was used to represent inter-individual differences in the amount of advertising exposure.

**Primary and secondary outcome measures:** Established smoking, defined as smoked >100 cigarettes during the observational period, and daily smoking at follow-up. Secondary outcome measures were any smoking and smoking in the last 30 days.

**Results:** During the observation period 5% of the never smokers at baseline smoked more than 100 cigarettes and 4.4% were classified as daily smokers. After controlling for age, gender, socio-economic status, school performance, television screen time, personality characteristics, and smoking status of peers and parents, each additional 10 tobacco advertising contacts increased the adjusted relative risk for established smoking by 38% (95% confidence interval: 16% - 63%;  $p < 0.001$ ) and for daily smoking by 30% (95% confidence interval: 3% - 64%;  $p < 0.05$ ). No significant association was found for non-tobacco advertising contact.

**Conclusions:** The study confirms a content-specific association between tobacco advertising and smoking behaviour and underlines that tobacco advertising exposure is not

1  
2  
3 simply a marker for adolescents that are generally more receptive or attentive towards  
4  
5 marketing.  
6  
7  
8  
9

## 10 11 **ARTICLE SUMMARY**

### 12 13 **Article focus**

- 14  
15 - High exposure to tobacco advertising might just be an indicator of high advertising  
16 exposure in general.
- 17  
18 - In this study we compare the potential of tobacco advertising vs. non-tobacco  
19 advertising exposure in predicting established and daily smoking of formerly never-  
20 smoking German adolescents.  
21  
22  
23  
24  
25  
26  
27  
28  
29

### 30 31 **Key messages**

- 32  
33 - Exposure to tobacco advertisements predicted established smoking and daily  
34 smoking, exposure to non-tobacco advertising did not.
- 35  
36 - The study also shows that advertising allowed under partial bans still reaches  
37 adolescents.  
38  
39  
40  
41  
42  
43

### 44 45 **Strengths and limitations of this study**

- 46  
47 - One of few studies that tests the specificity of the association between tobacco  
48 advertising and smoking.
- 49  
50 - Long follow-up period with smoking outcomes that are strongly predictive of  
51 becoming an addicted smoker.
- 52  
53 - A high drop-out rate and attrition bias are limiting factors of this study.  
54  
55  
56  
57  
58  
59  
60

## INTRODUCTION

Tobacco companies were among the first companies to use integrated marketing strategies, and their products have long been among the most heavily marketed products in the United States and worldwide.<sup>1</sup> The tobacco industry still denies that their marketing is targeted at young people. According to the industry the purpose of tobacco advertising is to maintain and increase market shares of adult consumers.<sup>2</sup> In contrast, empirical research indicates that adolescents are aware of, recognize, and are influenced by tobacco marketing strategies. The U.S. Surgeon General's 2012 comprehensive review of the tobacco marketing literature concluded that advertising and promotional activities by tobacco companies are key risk factors for the uptake to smoking in adolescents.<sup>3</sup>

A 2011 Cochrane review identified 19 longitudinal studies that followed up a total of over 29,000 subjects, who were adolescents aged 18 or younger, and were not regular smokers at baseline. In 18 of the 19 studies the nonsmoking adolescents who were more aware of tobacco advertising or receptive to it, were more likely to experiment with cigarettes or become smokers at follow up.<sup>4</sup>

Based on these research results, article 13 of the World Health Organization's (WHO) Framework Convention on Tobacco Control stipulates a comprehensive ban on tobacco advertising, promotion, and sponsorship.<sup>5</sup> A number of countries all over the world follow these recommendations, and have banned tobacco advertisements. However, other countries, such as the United States and Germany, have implemented considerably weaker tobacco marketing policies.<sup>6</sup> Germany has banned tobacco advertisements in television, radio, newspapers, and magazines, but there are still opportunities for the industry to promote their products: Tobacco marketing is allowed at point of sale, on billboards, and in cinemas before movies that show after 6:00 pm. Brand extension, i.e. the use of tobacco brand names for other products, is also allowed.

From a scientific point of view, the best way to study the effects of tobacco marketing would be a randomized controlled trial. But this kind of study design would be both unethical and



1  
2  
3 impractical. Since experimental studies cannot be conducted, we have to rely on  
4  
5 observational studies. Sir Austin Bradford Hill identified several criteria for evaluating  
6  
7 causality in epidemiological studies.<sup>7</sup> According to these criteria the risk factor (e.g. tobacco  
8  
9 marketing) must clearly precede the hypothesized effect (e.g. smoking uptake in young  
10  
11 people). In addition, the association should be strong, consistent, expected from theory, and  
12  
13 specific.

14  
15 The Cochrane review on the effects of tobacco advertising on young people<sup>4</sup> listed our  
16  
17 previous study<sup>8,9</sup> as the only one that tested the specificity of tobacco advertising compared  
18  
19 to advertisements of other consumer goods. Limitations of this study included (a) the short  
20  
21 nine months follow-up period, and (b) the outcome measure which defined smoking initiation  
22  
23 during the observational period as any smoking including a few puffs. Clearly, not all  
24  
25 adolescents who try smoking will go on to become addicted smokers. With the current study  
26  
27 we present findings from the same cohort, only for a much longer follow-up period (30  
28  
29 months). The longer follow-up period enables us to study established and daily smoking as  
30  
31 outcomes in young people, outcomes that are more strongly predictive of becoming an  
32  
33 addicted smoker.<sup>10</sup>  
34  
35  
36  
37  
38  
39  
40  
41  
42  
43  
44  
45  
46  
47  
48  
49  
50  
51  
52  
53  
54  
55  
56  
57  
58  
59  
60

## METHODS

### Study sample

In May 2008 we invited 120 randomly selected schools from three states of Germany (Brandenburg, Hamburg, and Schleswig-Holstein) to participate in a school-based survey. The German school system has different types of schools (*Grundschule, Hauptschule, Realschule, Oberschule, Gemeinschaftsschule, Gymnasium*) that mainly differ with regard to the academic skills of their students and graduation level. The selection was stratified by state and type of school, assuring a balanced representation of all school types of the respective states. Twenty-nine schools with 176 classes and 4195 sixth to eighth grade students agreed to participate after a four week recruitment interval. In September and October 2008 we surveyed a total of 174 classes with 3415 students (81.4% of the sampled students). Reasons for exclusion were either absence (2 classes, 134 students) or missing parental consent (646 students). From the 3415 students surveyed at baseline, 2346 were classified as never smokers. Of these, 1320 (56.3%) could be reached again at the follow-up assessment in May/June 2011. Reasons for study drop-out were loss of primary schools that end after sixth grade (7 schools, 14 classes, 194 students), refusal to participate at the follow-up assessment (1 school, 8 classes, 59 students) or class absence (24 classes, 291 students). Other reasons were unexplained absence on the day of data assessment or unmatchable student codes (482 students). The number of analyzed never smokers per school ranged from 3 to 232, class-sizes ranged from 1 to 26.

### Survey implementation

Data were collected through self-completed anonymous questionnaires during one school hour (45 min. period), administered by trained research staff. Only students with written parental consent were qualified for participation, parent consent forms were disseminated by class teachers three weeks prior to the baseline assessment. Students did not receive incentives for participation and irrespective of parental consent all students were free to

1  
2  
3 refuse participation (none refused). Class teachers assigned tasks for students that did not  
4 participate. After completion of the survey, questionnaires were placed in an envelope and  
5 sealed in front of the class. Students were assured that their individual information would not  
6 be seen by parents or teachers. To permit a linking of the baseline and follow-up  
7 questionnaires, students generated an anonymous seven-digit individual code, a procedure  
8 that had been tested in previous studies, slightly modified for this study.<sup>11</sup> Implementation  
9 was approved by all Ministries of Cultural Affairs of the three involved states, and ethical  
10 approval was obtained from the Ethical Committee of the Medical Faculty of the University of  
11 Kiel (Ref.: D 417/08).  
12  
13  
14  
15  
16  
17  
18  
19  
20  
21  
22  
23

## 24 **Measures**

### 25 *Advertising exposure*

26  
27 Advertising exposure has been operationalized in numerous ways across studies.<sup>4</sup> It has  
28 been measured both in terms of the physical presence of advertisements in individuals'  
29 environments and in terms of the psychological processes underlying individuals' memories  
30 for these advertisements.<sup>12</sup> In the present study we approximated the individual advertising  
31 contact frequency by providing masked colored images of billboard ads for cigarettes and  
32 fixed-images of TV commercials for non-tobacco ads with all brand-identifying content  
33 digitally removed, asking the students to rate how often they have ever seen each ad extract  
34 (on a 4-point scale with scale points 0="Never," 1="1 to 4 times," 2="5 to 10 times" and  
35 3="More than 10 times"). The answers were post-coded as 0=0, 1=2.5, 2=7.5, and 3=11 and  
36 summed up to create the tobacco and non-tobacco ad scales, respectively.  
37  
38  
39  
40  
41  
42  
43  
44  
45  
46  
47  
48  
49

50 The images included six cigarette brands, and eight "control" ads for products that included  
51 sweets, clothes, mobile phones, and cars. The following cigarette brands were included in  
52 the survey (with ad theme or cue in parentheses): (1) Marlboro (cowboy; horses); (2) F6  
53 (sunrise); (3) Gauloises (couple); (4) Pall Mall (Empire State Building); (5) L&M (couple); (6)  
54 Lucky Strike (cigarette packs). These six cigarette brands are among the eight most popular  
55  
56  
57  
58  
59  
60

1  
2  
3 cigarette brands in Germany.<sup>13</sup> For other commercial products, the following ads were  
4 included in the survey (with product type and ad theme or cue in parentheses): (1) Jack  
5 Wolfskin (trekking-clothing; climber); (2) Volkswagen (car; the performer Seal); (3) Tic Tac  
6 (candy; elevator); (4) Dr. Best (tooth brush; tomato); (5) Kinder Pingui (chocolate bar;  
7 penguins); (6) T-Mobile (mobile phone; dog); (7) Spee (detergent; fox); (8) Toyota (car).  
8 Advertising selection was based on a pilot study on 28 tobacco and non-tobacco ads (110  
9 students aged 11 to 16 years, mean age 13.6 years), selecting the half of ads that revealed  
10 neither ceiling nor floor effects and had corrected item-test correlations above  $r_{it}=0.40$ .  
11  
12

13  
14 We assessed ad exposure to non-tobacco products to control for the propensity to be  
15 receptive or attentive to advertising in general, which could confound the relation between  
16 tobacco-specific advertising exposure and smoking behavior.  
17  
18  
19

### 20 21 22 *Smoking behavior* 23 24 25 26 27 28

29  
30 We assessed lifetime smoking experience by asking "How many cigarettes have you smoked  
31 in your life?" (never smoked, just a few puffs, 1-19 cigarettes, 20-100 cigarettes, >100  
32 cigarettes).<sup>14</sup> Students that indicated any smoking at baseline, even just a few puffs, were  
33 excluded from the analysis. Having smoked more than 100 cigarettes at the follow-up  
34 assessment was defined as being an established smoker. Current smoking frequency was  
35 measured by asking, "How often do you smoke at present?" to which respondents could  
36 answer, "I don't smoke," "less than once a month," "at least once a month, but not weekly,"  
37 "at least once a week, but not daily," or "daily." For the present analysis, this variable was  
38 dichotomized into daily and non-daily smoking. To account for different smoking susceptibility  
39 in never-smokers at baseline we also assessed future use intentions ("Do you think you will  
40 ever smoke in the future?") and refusal intentions ("If one of your friends offered you a  
41 cigarette, would you take it?"), with response categories "Definitely not", "Probably not",  
42 "Probably yes", and "Definitely yes".<sup>15</sup>  
43  
44  
45  
46  
47  
48  
49  
50  
51  
52  
53  
54  
55  
56  
57  
58  
59  
60

### *Covariates*

Covariate measures were derived from studies that focus on risk factors of adolescent tobacco use, to control for confounding variables that would be theoretically related to ad exposure and the smoking measures.<sup>16-18</sup>

Sociodemographics: age, gender, study region, and socioeconomic status (SES); SES of the students was approximated with a combination of student and class teacher ratings:

Students answered three items of the PISA cultural and social capital assessment,<sup>19</sup> asking for the number of books in the household (5-point scale from 0 = "None" to 4 = "More than 100") and parenting characteristics ("My parents always know where I am" and "My parents know other parents from my school"), class teachers filled out an 11-item school evaluation sheet related to SES of their students (examples: "Most students of the school live in families with financial problems", "Most students of the school come from underprivileged families", "Our school has a good reputation", scale range from 0 = "Not true at all" to 3 = "Totally true", Cronbach's alpha = 0.85); student and teacher ratings positively correlated  $r = 0.57$ , alpha = 0.72.

Personal characteristics: self-reported school performance ("How would you describe your grades last year?", scale points "excellent", "good", "average", "below average"); average TV screen time ("How many hours do you usually watch TV in your leisure time?", scale points: "none", "about half an hour", "about an hour", "about two hours", "about three hours", "about four hours", "more than four hours a day"); rebelliousness and sensation-seeking, assessed with four items combined into a single index, with higher scores indicating greater propensity for rebelliousness and sensation seeking<sup>20</sup> ("I get in trouble in school"; "I do things my parents wouldn't want me to do"; "I like scary things"; "I like to do dangerous things", scale points 0 = "not at all like me", 1 = "a little like me", 2 = "pretty much like me", and 3 = "exactly like me", Cronbach's alpha = 0.76).

1  
2  
3 Social environment: parent smoking (0 = “No”, 1 = “Yes, 2) and peer smoking (0 = “None”, 1  
4 = “Some, 2 = “Most”, 3 = “All”). As mentioned above, we also controlled for the adolescent’s  
5 ability to recall advertising in general with the non-tobacco ad scale.  
6  
7

### 8 9 **Statistical analysis**

10 All data analyses were conducted with Stata version 12.0 (Stata Corp, College Station, TX).

11  
12 Chi-squared tests and T-tests were performed to check whether subjects included in the  
13 analysis differed systematically from those not reached at the follow-up assessment.  
14

15 Bivariate associations between the study variables were analyzed using Spearman rank  
16 correlations. The multivariate associations between amount of advertising exposure and  
17 smoking initiation were analyzed with Poisson regressions. Poisson regression allows for the  
18 presentation of adjusted Incidence Rate Ratios (IRRs) and 95% confidence intervals (CIs) for  
19 the relationship between exposure to advertising and smoking at follow-up, having the  
20 advantage of not being influenced by the prevalence of the exposure. IRRs were calculated  
21 for every 10 advertising contacts, indicating the relative increase in smoking incidence  
22 (established smoking and daily smoking) for each additional 10 contacts. The dichotomized  
23 outcome variables were regressed on advertising exposure after inclusion of all covariates  
24 and with clustered robust standard errors to account for intra-class correlations within  
25 schools. In a subsequent analysis we repeated the Poisson regressions with advertising  
26 contact frequency being parsed into tertiles to account for the skewed distribution of tobacco  
27 advertising contact and to replicate the approach used in our previous analysis.<sup>9</sup> Missing  
28 data were handled by listwise deletion.  
29  
30  
31  
32  
33  
34  
35  
36  
37  
38  
39  
40  
41  
42  
43  
44  
45  
46  
47  
48  
49

## 50 **RESULTS**

### 51 52 **Descriptive statistics at baseline and attrition analysis**

53 Table 1 gives descriptive statistics for all interviewed never smokers at baseline, for those  
54 lost to follow-up, and the final analyzed sample, allowing comparisons of differences due to  
55  
56  
57  
58  
59  
60

attrition. Never smokers lost to follow-up were significantly younger of age, more often male, had lower scores on the SES scale, rated their school performance more poorly, had higher scores in sensation seeking/rebelliousness and more often reported at least one parent who smoked. No differences were found with regard to tobacco or non-tobacco advertising contact.

**Table 1.** Descriptive sample statistics at baseline and attrition analysis.

|                                            | Baseline never smokers<br>(n=2346)<br>% | Lost to follow-up<br>(n=1026)<br>% | Analyzed Sample<br>(n=1320)<br>% | p     |
|--------------------------------------------|-----------------------------------------|------------------------------------|----------------------------------|-------|
| <b>Sociodemographics</b>                   |                                         |                                    |                                  |       |
| Age at baseline, mean (SD)                 | 12.24 (1.01)                            | 12.16 (1.09)                       | 12.30 (0.93)                     | .001  |
| Gender: Female                             | 54.9                                    | 51.9                               | 57.3                             | .008  |
| SES: Below Median                          | 51.1                                    | 60.6                               | 43.8                             | <.001 |
| <b>State</b>                               |                                         |                                    |                                  |       |
| Schleswig-Holstein                         | 41.6                                    | 39.8                               | 43.0                             | .279  |
| Hamburg                                    | 28.4                                    | 29.1                               | 27.8                             |       |
| Brandenburg                                | 30.0                                    | 31.1                               | 29.2                             |       |
| <b>Personal characteristics</b>            |                                         |                                    |                                  |       |
| <b>School performance</b>                  |                                         |                                    |                                  |       |
| Below average                              | 2.5                                     | 3.7                                | 1.5                              | <.001 |
| Average                                    | 33.7                                    | 37.8                               | 30.6                             |       |
| Good                                       | 49.9                                    | 44.9                               | 53.9                             |       |
| Excellent                                  | 13.9                                    | 13.6                               | 14.0                             |       |
| <b>TV screen time</b>                      |                                         |                                    |                                  |       |
| ≤ 30 min                                   | 16.8                                    | 15.5                               | 17.8                             | .051  |
| 1-2 h                                      | 59.5                                    | 58.8                               | 60.1                             |       |
| 3-4 h                                      | 19.0                                    | 19.8                               | 18.3                             |       |
| > 4 h                                      | 4.7                                     | 5.9                                | 3.8                              |       |
| Sensation seeking and                      | 0.53 (0.50)                             | 0.56 (0.51)                        | 0.50 (0.49)                      | .010  |
| <b>Social environment</b>                  |                                         |                                    |                                  |       |
| Peer smoking: None                         | 71.7                                    | 71.5                               | 71.9                             | .858  |
| Parent smoking: No                         | 53.3                                    | 49.3                               | 56.4                             | .001  |
| <b>Advertising exposure</b>                |                                         |                                    |                                  |       |
| <b>Tobacco advertising, range 0-55</b>     |                                         |                                    |                                  |       |
| Low (< 1)                                  | 35.3                                    | 35.3                               | 35.4                             | .600  |
| Medium (1 - 10)                            | 38.7                                    | 39.7                               | 38.0                             |       |
| High (> 10)                                | 26.0                                    | 25.0                               | 26.6                             |       |
| <b>Non-tobacco advertising, range 0-88</b> |                                         |                                    |                                  |       |
| Low (< 35)                                 | 39.8                                    | 40.8                               | 39.0                             | .469  |
| Medium (35 – 54)                           | 32.1                                    | 32.4                               | 32.0                             |       |
| High (> 54)                                | 28.1                                    | 26.8                               | 29.0                             |       |

### Smoking initiation during the observational period

Thirty months after the baseline assessment 436 never smokers reported trying cigarette smoking including a few puffs (33% incidence rate), 138 reported smoking in the past 30 days (10.5% incidence rate), Sixty-six had smoked more than 100 cigarettes and were classified as established smokers (incidence rate 5%), and 58 reported daily smoking (incidence rate 4.4%). Daily smoking incidence was not significantly related to age ( $p=0.526$ ) or sex ( $p=0.153$ ), with 33% of the daily smokers at follow-up being 14 years of age or younger and 24% being 16 or older.

### Exposure to advertisements at baseline

**Table 2.** Contact frequency for tobacco and non-tobacco advertisements (n = 1320 never smokers at baseline)

|                                       | Seen at least<br>once<br>% | Seen more than<br>10 times<br>% |
|---------------------------------------|----------------------------|---------------------------------|
| <b>Tobacco ads (product type)</b>     |                            |                                 |
| Lucky Strike (cigarettes)             | 49                         | 13                              |
| Marlboro (cigarettes)                 | 28                         | 6                               |
| Pall Mall (cigarettes)                | 24                         | 6                               |
| Gauloises (cigarettes)                | 19                         | 2                               |
| L&M (cigarettes)                      | 18                         | 4                               |
| F6 (cigarettes)                       | 12                         | 1                               |
| <b>Non-tobacco ads (product type)</b> |                            |                                 |
| Kinder Pingui (sweet)                 | 96                         | 71                              |
| Tic Tac (candy)                       | 87                         | 44                              |
| Dr. Best (tooth brush)                | 83                         | 36                              |
| T-Mobile (mobile phone)               | 85                         | 35                              |
| Spee (detergent)                      | 76                         | 24                              |
| Volkswagen (car)                      | 50                         | 14                              |
| Toyota (car)                          | 54                         | 10                              |
| Jack Wolfskin (trekking-clothing)     | 45                         | 9                               |

Table 2 gives contact frequencies (how often the students had seen the ad) for all advertised products at baseline. The cigarette ad with the highest contact frequency was Lucky Strike, for which about half of the sample reported at least one contact. The lowest tobacco ad



1  
2  
3 contact frequency rate was found for F6, a regional German cigarette brand sold mainly in  
4 eastern Germany. Ad contact frequency for non-tobacco products was generally much higher  
5 than for tobacco products. For example, almost all students (96%) reported having seen the  
6 ad for Kinder Pingui, a chocolate bar. The range of the sum of contacts over all depicted  
7 advertisements was 0 to 55 (mean=7.9) for the tobacco ads, and 0 to 88 (mean=42.2) for the  
8 non-tobacco ads, also reflecting the lower number of tobacco ads (6 vs. 8).  
9  
10  
11  
12  
13

### 14 15 16 **Zero order associations**

17  
18  
19 Table 3 shows pairwise Spearman rank correlations between the study variables,  
20 demonstrating significant crude associations between the assessed covariates and smoking  
21 behavior as well as between covariates and advertising contact, justifying their inclusion in  
22 the multivariate analyses. The highest correlations with all smoking outcomes was found for  
23 peer smoking, followed by tobacco advertising contact. There were some differences in the  
24 correlational pattern between tobacco and non-tobacco advertising contact. Compared to the  
25 amount of contact with tobacco ads, non-tobacco advertising exposure was stronger related  
26 to age and showed no association with gender, and also had a stronger correlation with SES,  
27 TV screen time, and parental smoking. The zero-order correlation between tobacco and non-  
28 tobacco advertising contact indicated a proportion of about 20% shared variance.  
29  
30  
31  
32  
33  
34  
35  
36  
37  
38  
39

### 40 41 **Association between advertising contact and smoking initiation**

42  
43  
44 Figures 1a and 1b show the adjusted predictions of established smoking and daily smoking  
45 based on the amount of tobacco and non-tobacco advertising contact. The curves illustrate  
46 an increasing risk for the two smoking outcomes dependent on the amount of tobacco ad  
47 contact, but not for non-tobacco advertising contact.  
48  
49  
50  
51  
52  
53  
54

55  
56  
57  
58  
59  
60  
Insert Figures 1a and 1b about here

**Table 3.** Zero-order correlation matrix for all study variables.

|                                        | 1.             | 2.             | 3.              | 4.             | 5.             | 6.             | 7.             | 8.             | 9.             | 10.            | 11.            | 12.            | 13.            | 14.            |
|----------------------------------------|----------------|----------------|-----------------|----------------|----------------|----------------|----------------|----------------|----------------|----------------|----------------|----------------|----------------|----------------|
| 1. Age                                 | 1.00           |                |                 |                |                |                |                |                |                |                |                |                |                |                |
| 2. Gender<br>(0=female, 1=male)        | 0.02           | 1.00           |                 |                |                |                |                |                |                |                |                |                |                |                |
| 3. SES                                 | <b>-0.07*</b>  | 0.02           | 1.00            |                |                |                |                |                |                |                |                |                |                |                |
| 4. Region<br>(0=west, 1=east)          | <b>0.25***</b> | -0.01          | <b>-0.10*</b>   | 1.00           |                |                |                |                |                |                |                |                |                |                |
| 5. School<br>performance               | <b>0.11***</b> | 0.03           | <b>-0.16***</b> | -0.05          | 1.00           |                |                |                |                |                |                |                |                |                |
| 6. TV screen time                      | <b>0.17***</b> | <b>0.07**</b>  | <b>-0.30***</b> | <b>0.25***</b> | <b>0.15***</b> | 1.00           |                |                |                |                |                |                |                |                |
| 7. Sensation seeking                   | <b>0.09***</b> | <b>0.24***</b> | -0.03           | 0.01           | <b>0.16***</b> | <b>0.18***</b> | 1.00           |                |                |                |                |                |                |                |
| 8. Peer smoking                        | <b>0.28***</b> | 0.02           | <b>-0.22***</b> | <b>0.28***</b> | <b>0.15***</b> | <b>0.24***</b> | <b>0.24***</b> | 1.00           |                |                |                |                |                |                |
| 9. Parent smoking                      | 0.04           | -0.02          | <b>-0.26***</b> | <b>0.09***</b> | <b>0.11**</b>  | <b>0.22***</b> | <b>0.08**</b>  | <b>0.17***</b> | 1.00           |                |                |                |                |                |
| 10. Tobacco ad<br>exposure             | <b>0.14***</b> | <b>0.13***</b> | 0.02            | <b>-0.06*</b>  | 0.05           | <b>0.11**</b>  | <b>0.24***</b> | <b>0.13***</b> | <b>0.08**</b>  | 1.00           |                |                |                |                |
| 11. Non-tobacco ad<br>exposure         | <b>0.20***</b> | 0.05           | <b>-0.08**</b>  | <b>0.11**</b>  | <b>0.06*</b>   | <b>0.36***</b> | <b>0.21***</b> | <b>0.18***</b> | <b>0.18***</b> | <b>0.44***</b> | 1.00           |                |                |                |
| 12. Ever smoking                       | <b>0.15***</b> | 0.01           | <b>-0.17***</b> | <b>0.14***</b> | <b>0.09**</b>  | <b>0.14***</b> | <b>0.18***</b> | <b>0.24***</b> | <b>0.13***</b> | <b>0.19***</b> | <b>0.15***</b> | 1.00           |                |                |
| 13. Past 30 days<br>smoking            | <b>0.09**</b>  | -0.02          | <b>-0.12**</b>  | <b>0.08**</b>  | <b>0.06*</b>   | <b>0.12**</b>  | <b>0.15***</b> | <b>0.21***</b> | <b>0.14***</b> | <b>0.17***</b> | <b>0.12***</b> | <b>0.61***</b> | 1.00           |                |
| 14. Established<br>smoking (>100 cig.) | <b>0.07*</b>   | <b>0.09**</b>  | <b>-0.07*</b>   | <b>0.08**</b>  | 0.05           | <b>0.10*</b>   | <b>0.12**</b>  | <b>0.16***</b> | <b>0.09***</b> | <b>0.13***</b> | <b>0.09**</b>  | <b>0.33***</b> | <b>0.51***</b> | 1.00           |
| 15. Daily smoking                      | 0.02           | 0.04           | <b>-0.14***</b> | <b>0.08**</b>  | <b>0.07*</b>   | <b>0.10*</b>   | <b>0.09**</b>  | <b>0.14***</b> | <b>0.13***</b> | <b>0.08**</b>  | 0.03           | <b>0.30***</b> | <b>0.49***</b> | <b>0.75***</b> |

Bold figures == significant associations

\*p<0.05; \*\*p<0.01; \*\*\*p<0.001

1  
2  
3 The Figures also report the adjusted incidence rate ratios associated with an increase in  
4 advertising exposure. There was an adjusted IRR for established smoking of 1.38 (95% CI  
5 1.16, 1.63;  $p < 0.001$ ) for each additional 10 tobacco ad contacts and 1.00 (95% CI 0.84, 1.19;  
6  
7  $p = 0.996$ ) for each additional 10 non-tobacco ad contacts. For daily smoking, the  
8  
9 corresponding IRRs were 1.30 (95% CI 1.03, 1.64;  $p = 0.029$ ) for 10 tobacco ad contacts and  
10  
11 0.92 (95% CI 0.79, 1.08;  $p = 0.296$ ) for 10 non-tobacco ad contacts, respectively.  
12  
13

14  
15 Due to the skewed distribution of tobacco ad contact frequency (more than half of the never-  
16 smoking students had fewer than 10 contacts), we repeated the analysis using contact  
17 frequency parsed into tertiles, representing relative low (0-2.5), medium (5-10), and high (11-  
18 55) advertising contact. For established smoking the adjusted IRRs were 1.52 for tobacco  
19 ads (95% CI 1.14, 2.03;  $p = 0.004$ ) and 1.05 for non-tobacco ads (95% CI 0.68, 1.62;  
20  
21  $p = 0.819$ ). Using daily smoking as outcome variable the IRRs were 1.43 (95% CI 1.08, 1.90;  
22  
23  $p = 0.012$ ) and 0.84 (95% CI 0.58, 1.22;  $p = 0.363$ ) for each additional tertile of tobacco and  
24  
25 non-tobacco advertising contact. These IRRs relate to 3.1%, 4.8%, and 7.3% established  
26  
27 smoking attributable incidence rate or 3.1%, 4.6%, and 6.4% daily smoking incidence for low,  
28  
29 medium, and high tobacco advertising contact, respectively, assuming the adjusted analysis  
30  
31 adequately controlled for third variable influence.  
32  
33  
34  
35  
36  
37  
38

39 To address the question if some never smokers had higher tobacco advertising contact  
40 because they were already more susceptible towards smoking at baseline, we conducted a  
41 sensitivity analysis with only never smokers with low susceptibility. These students reported  
42 that they will definitely never smoke in the future and will definitely not try cigarettes if a friend  
43 offered one ( $n = 803$ ). In this restricted sub-sample the adjusted IRR for each additional 10  
44 tobacco ad contacts was 1.37 for established smoking (95% CI 1.07, 1.76;  $p = 0.012$ ) and  
45  
46 1.33 for daily smoking (95% CI 1.02, 1.75;  $p = 0.038$ ). Again, no significant associations were  
47  
48 found for non-tobacco advertisings.  
49  
50  
51  
52  
53  
54  
55  
56  
57  
58  
59  
60

## DISCUSSION

This longitudinal study is a further test of the relationship between tobacco advertising exposure and youth smoking behavior, confirming the specificity of the advertising-smoking link by comparing the effects of tobacco versus non-tobacco advertising. The study extends previous work by using two less prevalent outcome measures (established and daily smoking) and a longer follow-up period of 2.5 years, measures likely to indicate an addiction component to the smoking.<sup>21</sup> Compared to the results reported on smoking initiation in terms of ever smoking (even a few puffs),<sup>9</sup> the increase in the adjusted relative risk for daily smoking dependent on tobacco advertising exposure was even more pronounced. Specificity was shown by the finding that tobacco advertising at baseline predicted these outcomes independent of the amount of general advertising contact and after controlling for a number of well-known risk factors for smoking initiation. This result confirms the content-specific association between tobacco advertising and smoking behaviour and underlines that tobacco advertising exposure is not simply a marker for adolescents that are generally more receptive or attentive towards marketing.

This longitudinal study also clearly points out the implications of partial tobacco advertising bans in countries like the United States and Germany. The one-third of adolescents in the highest tertile of advertising had rates of daily and established smoking that were double (3 percentage points higher) than adolescents in the first tertile. In reverse, assuming that the models were fully adjusted for other confounding influences, one might expect a significant further decrease in the rates of smoking in these countries after a total elimination of tobacco advertising.

Some limitations of the study have to be considered. There was a severe loss of students during the 30 months interval (44%). To a large degree the drop-out was due to organizational issues (e.g., school and class changes) that are unlikely systematically related to advertising exposure or smoking behavior on the individual level. However, the lost students differed on a couple of dimensions from the retained students, i.e., age, gender,

1  
2  
3 socio-economic status, school performance, sensation seeking, and parental smoking. With  
4  
5 the exception of the lower age, the drop-out markers indicate that lower risk adolescents  
6  
7 were more likely to be retained. This might have biased the results as the effect of one risk  
8  
9 factor might not be independent of other risk factors. Generally, one would assume that the  
10  
11 associations get more conservative if higher risk adolescents are excluded, because this  
12  
13 group has a higher likelihood of starting to smoke. However, in the context of media effects  
14  
15 on smoking initiation there is also evidence that lower risk adolescents have a higher  
16  
17 responsiveness towards media effects<sup>22,23</sup>, indicating that the present results might not be  
18  
19 generalised to the whole population of adolescents. Second, as with any observational study,  
20  
21 the results may be biased by unmeasured confounding – that is, an unmeasured risk factor  
22  
23 could alter the estimates reported for the association between tobacco advertising and  
24  
25 smoking onset. Third, the memory-based measure of ad exposure could be biased by  
26  
27 memory effects other than the ones we controlled for. The potential to remember ads (in  
28  
29 terms of contact frequency) should, however, not be completely independent of actual  
30  
31 exposure. Finally, because the implemented method did not use a representative sample of  
32  
33 all broadcasted ads, it does not allow for an accurate estimation of the total amount of  
34  
35 tobacco and non-tobacco advertising exposure or the advertising pressure of specific brands.  
36  
37 This is amplified by the modification of the stimulus material which did not contain any brand  
38  
39 information.

40  
41  
42 The finding that exposure to tobacco advertising predicts smoking in youth could have  
43  
44 important public health implications. A total ban of tobacco advertising and promotion around  
45  
46 the world is one key policy measure of the WHO Framework Convention on Tobacco Control  
47  
48 (FCTC)<sup>24</sup>. Under Article 13.1 of the FCTC, 'Parties recognize that a comprehensive ban on  
49  
50 advertising, promotion and sponsorship would reduce the consumption of tobacco products'.  
51  
52 Data from this study support this measure, because only exposure to tobacco  
53  
54 advertisements predicted smoking initiation, which cannot be attributed to a general  
55  
56 receptiveness to marketing and because it shows that advertising allowed under partial bans  
57  
58 is still reaching adolescents.  
59  
60

## STATEMENTS

### Licence

The Corresponding Author has the right to grant on behalf of all authors and does grant on behalf of all authors, an exclusive licence (or non-exclusive for government employees) on a worldwide basis to the BMJ Group and co-owners or contracting owning societies (where published by the BMJ Group on their behalf), and its Licensees to permit this article (if accepted) to be published in BMJ and any other BMJ Group products and to exploit all subsidiary rights, as set out in our licence.

### Funding

This study was financed by DAK-Gesundheit, a German health insurance firm.

### Acknowledgement

We like to thank Mandy Gauditz, Lars Grabbe, Sven Heid, Frank Kirschneck, Carmen and Sarah Koynowski, Detlef Kraut, Corinna Liefeld, Karin Maruska, Danuta Meinhardt, Marc Räder, Jan Sängler, and Gesa Sander for assessing the data.

### Competing interests:

None.

### Contributors:

Conception and design of the study: All authors

Analysis and interpretation of data: MM, RH

1  
2  
3 Collection and assembly of data: MM, BI

4  
5 Drafting of the article: MM, JS, RH

6  
7 Critical revision of the article for important intellectual content: All authors

8  
9 Final approval of the article: All authors

10  
11  
12  
13  
14 All authors have full access to all of the data (including statistical reports and tables) in the  
15 study and can take responsibility for the integrity of the data and the accuracy of the data  
16 analysis.  
17  
18  
19

20  
21  
22  
23 Study implementation was approved by the Ethical Committee of the Medical Faculty of the  
24 University of Kiel (Ref.: D 417/08).  
25  
26  
27

28  
29  
30 **Data sharing:** No additional data available.  
31  
32  
33  
34  
35  
36  
37  
38  
39  
40  
41  
42  
43  
44  
45  
46  
47  
48  
49  
50  
51  
52  
53  
54  
55  
56  
57  
58  
59  
60

## References

- (1) Brandt AM. The cigarette century: The rise, fall and deadly persistence of the product that defined America. New York, NY: Basic Books; 2007.
- (2) Pollay RW. Targeting youth and concerned smokers: evidence from Canadian tobacco industry documents. *Tob Control* 2000; 9(2):136-147.
- (3) U.S. Department of Health and Human Services. Preventing tobacco use among youth and young adults: A report of the Surgeon General. Atlanta, GA: U.S. Department of Health and Human Services, Centers for Disease Control and Prevention, National Center for Chronic Disease Prevention and Health Promotion, Office on Smoking and Health; 2012.
- (4) Lovato C, Watts A, Stead LF. Impact of tobacco advertising and promotion on increasing adolescent smoking behaviours. *Cochrane Database Syst Rev* 2011;(10):CD003439.
- (5) Henriksen L. Comprehensive tobacco marketing restrictions: promotion, packaging, price and place. *Tob Control* 2012; 21(2):147-153.
- (6) Strasburger VC. Policy statement--children, adolescents, substance abuse, and the media. *Pediatrics* 2010; 126(4):791-799.
- (7) Hill AB. The environment and disease: association or causation? *Proc R Soc Med* 1965; 58:295-300.
- (8) Hanewinkel R, Isensee B, Sargent JD, Morgenstern M. Cigarette advertising and adolescent smoking. *Am J Prev Med* 2010; 38(4):359-366.
- (9) Hanewinkel R, Isensee B, Sargent JD, Morgenstern M. Cigarette advertising and teen smoking initiation. *Pediatrics* 2011; 127(2):e271-e278.
- (10) Kenford SL, Wetter DW, Welsch SK, Smith SS, Fiore MC, Baker TB. Progression of college-age cigarette samplers: what influences outcome. *Addict Behav* 2005; 30(2):285-294.
- (11) Galanti MR, Siliquini R, Cuomo L, Melero JC, Panella M, Faggiano F. Testing anonymous link procedures for follow-up of adolescents in a school-based trial: The EU-DAP pilot study. *Prev Med* 2007; 44(2):174-177.
- (12) Klitzner M, Gruenewald PJ, Bamberger E. Cigarette advertising and adolescent experimentation with smoking. *Br J Addict* 1991; 86(3):287-298.
- (13) Deutsches Krebsforschungszentrum. The Tobacco Atlas Germany 2009. Heidelberg: Deutsches Krebsforschungszentrum (in German); 2009.
- (14) Bondy SJ, Victor JC, Diemert LM. Origin and use of the 100 cigarette criterion in tobacco surveys. *Tob Control* 2009; 18(4):317-323.



- 1  
2  
3 (15) Pierce JP, Choi WS, Gilpin EA, Merritt RK, Farkas AJ. Validation of susceptibility as a  
4 predictor of which adolescents take up smoking in the United States. *Health Psychol*  
5 1996; 15:355-361.  
6  
7 (16) Gibbons FX, Gerrard M. Predicting young adults' health risk behavior. *J Pers Soc*  
8 *Psychol* 1995; 69(3):505-517.  
9  
10 (17) Hawkins JD, Catalano RF, Miller JY. Risk and protective factors for alcohol and other  
11 drug problems in adolescence and early adulthood: implications for substance abuse  
12 prevention. *Psychol Bull* 1992; 112(1):64-105.  
13  
14 (18) Petraitis J, Flay BR, Miller TQ. Reviewing theories of adolescent substance use:  
15 organizing pieces in the puzzle. *Psychol Bull* 1995; 117(1):67-86.  
16  
17 (19) Kunter M, Schümer G, Artelt C, Baumert J, Klieme E, Neubrand M et al. Pisa 2000:  
18 Dokumentation der Erhebungsinstrumente (Pisa 2000: Documentation of measures).  
19 Berlin: Max-Planck-Institut für Bildungsforschung (in German); 2002.  
20  
21 (20) Russo MF, Stokes GS, Lahey BB, Christ MAG, McBurnett K, Loeber R et al. A  
22 sensation seeking scale for children: Further refinement and psychometric  
23 development. *J Psychopathol Behav Assess* 1993; 15:69-85.  
24  
25 (21) Sargent JD, Mott LA, Stevens M. Predictors of smoking cessation in adolescents.  
26 *Arch Pediatr Adolesc Med* 1998; 152(4):388-393.  
27  
28 (22) Dalton MA, Sargent JD, Beach ML, Titus-Ernstoff L, Gibson JJ, Ahrens MB et al.  
29 Effect of viewing smoking in movies on adolescent smoking initiation: a cohort study.  
30 *Lancet* 2003; 362(9380):281-285.  
31  
32 (23) Hanewinkel R, Sargent JD. Exposure to smoking in internationally distributed  
33 American movies and youth smoking in Germany: a cross-cultural cohort study.  
34 *Pediatrics* 2008; 121(1):e108-e117.  
35  
36 (24) Shibuya K, Ciecierski C, Guindon E, Bettcher DW, Evans DB, Murray CJ. WHO  
37 Framework Convention on Tobacco Control: development of an evidence based  
38 global public health treaty. *BMJ* 2003; 327(7407):154-157.  
39  
40  
41  
42  
43  
44  
45  
46  
47  
48  
49  
50  
51  
52  
53  
54  
55  
56  
57  
58  
59  
60

1  
2  
3 **Figure legend**  
4  
5  
6  
7

8 **Figures 1a and 1b**

9 ----- Tobacco advertising      — Non-tobacco advertising  
10

11 IRR = Incidence Rate Ratio for 10 additional advertising contacts

12 Figures in brackets = 95% Confidence Interval

13 n.s. = not significant; \* $p < .05$ ; \*\*\* $p < .001$   
14  
15  
16  
17  
18  
19  
20  
21  
22  
23  
24  
25  
26  
27  
28  
29  
30  
31  
32  
33  
34  
35  
36  
37  
38  
39  
40  
41  
42  
43  
44  
45  
46  
47  
48  
49  
50  
51  
52  
53  
54  
55  
56  
57  
58  
59  
60

1  
2  
3 **From never to daily smoking in 30 months:**

4  
5 **The predictive value of tobacco and non-tobacco advertising exposure**

6  
7  
8  
9 Matthis Morgenstern, PhD <sup>1,2</sup>

10  
11 James D. Sargent, MD <sup>3</sup>

12  
13 Barbara Isensee, PhD <sup>1</sup>

14  
15 Reiner Hanewinkel, PhD <sup>1,2</sup>

16  
17  
18  
19 <sup>1</sup> Institute for Therapy and Health Research (IFT-Nord)  
20 Harmsstrasse 2  
21 24114 Kiel  
22 Germany

23  
24  
25 <sup>2</sup> Institute for Medical Psychology and Medical Sociology, University Medical Center  
26 Schleswig-Holstein, Campus Kiel  
27 Diesterwegstrasse 10-12  
28 24113 Kiel  
29 Germany

30  
31 <sup>3</sup> Geisel School of Medicine at Dartmouth  
32 Cancer Control Research Program  
33 Norris Cotton Cancer Center  
34 Lebanon, NH  
35 USA

36  
37  
38 Corresponding author:  
39 M. Morgenstern  
40 Institute for Therapy and Health Research (IFT-Nord)  
41 Harmsstrasse 2  
42 24114 Kiel  
43 Germany  
44 Phone: +49 431 570 29 35  
45 Fax: +49 431 570 29 29  
46 Mail: morgenstern@ift-nord.de

47  
48  
49  
50 **Keywords:** adolescence • cigarettes • marketing • advertising • longitudinal • Germany

51  
52  
53 Word count (text only): 3589

54  
55 Number of tables: 3

56  
57 Number of figures: 2

## ABSTRACT

**Objective:** To test the specificity of the association between tobacco advertising and youth smoking initiation.

**Design:** Longitudinal survey with a 30-months interval.

**Setting:** Twenty-one public schools in 3 German states.

**Participants:** A total of 1320 sixth- to eighth-grade students who were never-smokers at baseline (age range at baseline, 10-15 years; mean, 12.3 years).

**Exposures:** Exposure to tobacco and non-tobacco advertisements was measured at baseline with images of 6 tobacco and 8 non-tobacco advertisements; students indicated the number of times they had seen each ad and the sum score over all advertisements was used to represent inter-individual differences in the amount of advertising exposure.

**Primary and secondary outcome measures:** Established smoking, defined as smoked >100 cigarettes during the observational period, and daily smoking at follow-up. Secondary outcome measures were any smoking and smoking in the last 30 days.

**Results:** During the observation period 5% of the never smokers at baseline smoked more than 100 cigarettes and 4.4% were classified as daily smokers. After controlling for age, gender, socio-economic status, school performance, television screen time, personality characteristics, and smoking status of peers and parents, each additional 10 tobacco advertising contacts increased the adjusted relative risk for established smoking by 38% (95% confidence interval: 16% - 63%;  $p < 0.001$ ) and for daily smoking by 30% (95% confidence interval: 3% - 64%;  $p < 0.05$ ). No significant association was found for non-tobacco advertising contact.

**Conclusions:** The study confirms a content-specific association between tobacco advertising and smoking behaviour and underlines that tobacco advertising exposure is not

1  
2  
3 simply a marker for adolescents that are generally more receptive or attentive towards  
4  
5 marketing.  
6  
7  
8  
9

## 10 11 **ARTICLE SUMMARY** 12

### 13 14 **Article focus** 15

- 16 - High exposure to tobacco advertising might just be an indicator of high advertising  
17 exposure in general.  
18
- 19 - In this study we compare the potential of tobacco advertising vs. non-tobacco  
20 advertising exposure in predicting established and daily smoking of formerly never-  
21 smoking German adolescents.  
22  
23  
24  
25  
26  
27  
28  
29

### 30 31 **Key messages** 32

- 33 - Exposure to tobacco advertisements predicted established smoking and daily  
34 smoking, exposure to non-tobacco advertising did not.  
35
- 36 - The study also shows that advertising allowed under partial bans still reaches  
37 adolescents.  
38  
39  
40  
41  
42  
43

### 44 45 **Strengths and limitations of this study** 46

- 47 - One of few studies that tests the specificity of the association between tobacco  
48 advertising and smoking.  
49
- 50 - Long follow-up period with smoking outcomes that are strongly predictive of  
51 becoming an addicted smoker.  
52  
53
- 54 - A high drop-out rate and attrition bias are limiting factors of this study.  
55  
56  
57  
58  
59  
60

## INTRODUCTION

Tobacco companies were among the first companies to use integrated marketing strategies, and their products have long been among the most heavily marketed products in the United States and worldwide.<sup>1</sup> The tobacco industry still denies that their marketing is targeted at young people. According to the industry the purpose of tobacco advertising is to maintain and increase market shares of adult consumers.<sup>2</sup> In contrast, empirical research indicates that adolescents are aware of, recognize, and are influenced by tobacco marketing strategies. The U.S. Surgeon General's 2012 comprehensive review of the tobacco marketing literature concluded that advertising and promotional activities by tobacco companies are key risk factors for the uptake to smoking in adolescents.<sup>3</sup>

A 2011 Cochrane review identified 19 longitudinal studies that followed up a total of over 29,000 subjects, who were adolescents aged 18 or younger, and were not regular smokers at baseline. In 18 of the 19 studies the nonsmoking adolescents who were more aware of tobacco advertising or receptive to it, were more likely to experiment with cigarettes or become smokers at follow up.<sup>4</sup>

Based on these research results, article 13 of the World Health Organization's (WHO) Framework Convention on Tobacco Control stipulates a comprehensive ban on tobacco advertising, promotion, and sponsorship.<sup>5</sup> A number of countries all over the world follow these recommendations, and have banned tobacco advertisements. However, other countries, such as the United States and Germany, have implemented considerably weaker tobacco marketing policies.<sup>6</sup> Germany has banned tobacco advertisements in television, radio, newspapers, and magazines, but there are still opportunities for the industry to promote their products: Tobacco marketing is allowed at point of sale, on billboards, and in cinemas before movies that show after 6:00 pm. Brand extension, i.e. the use of tobacco brand names for other products, is also allowed.

From a scientific point of view, the best way to study the effects of tobacco marketing would be a randomized controlled trial. But this kind of study design would be both unethical and

1  
2  
3 impractical. Since experimental studies cannot be conducted, we have to rely on  
4  
5 observational studies. Sir Austin Bradford Hill identified several criteria for evaluating  
6  
7 causality in epidemiological studies.<sup>7</sup> According to these criteria the risk factor (e.g. tobacco  
8  
9 marketing) must clearly precede the hypothesized effect (e.g. smoking uptake in young  
10  
11 people). In addition, the association should be strong, consistent, expected from theory, and  
12  
13 specific.

14  
15 The Cochrane review on the effects of tobacco advertising on young people<sup>4</sup> listed our  
16  
17 previous study<sup>8,9</sup> as the only one that tested the specificity of tobacco advertising compared  
18  
19 to advertisements of other consumer goods. Limitations of this study included (a) the short  
20  
21 nine months follow-up period, and (b) the outcome measure which defined smoking initiation  
22  
23 during the observational period as any smoking including a few puffs. Clearly, not all  
24  
25 adolescents who try smoking will go on to become addicted smokers. With the current study  
26  
27 we present findings from the same cohort, only for a much longer follow-up period (30  
28  
29 months). The longer follow-up period enables us to study established and daily smoking as  
30  
31 outcomes in young people, outcomes that are more strongly predictive of becoming an  
32  
33 addicted smoker.<sup>10</sup>  
34  
35  
36  
37  
38  
39  
40  
41  
42  
43  
44  
45  
46  
47  
48  
49  
50  
51  
52  
53  
54  
55  
56  
57  
58  
59  
60

## METHODS

### Study sample

In May 2008 we invited 120 randomly selected schools from three states of Germany (Brandenburg, Hamburg, and Schleswig-Holstein) to participate in a school-based survey. The German school system has different types of schools (*Grundschule, Hauptschule, Realschule, Oberschule, Gemeinschaftsschule, Gymnasium*) that mainly differ with regard to the academic skills of their students and graduation level. The selection was stratified by state and type of school, assuring a balanced representation of all school types of the respective states. Twenty-nine schools with 176 classes and 4195 sixth to eighth grade students agreed to participate after a four week recruitment interval. In September and October 2008 we surveyed a total of 174 classes with 3415 students (81.4% of the sampled students). Reasons for exclusion were either absence (2 classes, 134 students) or missing parental consent (646 students). From the 3415 students surveyed at baseline, 2346 were classified as never smokers. Of these, 1320 (56.3%) could be reached again at the follow-up assessment in May/June 2011. Reasons for study drop-out were loss of primary schools that end after sixth grade (7 schools, 14 classes, 194 students), refusal to participate at the follow-up assessment (1 school, 8 classes, 59 students) or class absence (24 classes, 291 students). Other reasons were unexplained absence on the day of data assessment or unmatchable student codes (482 students). The number of analyzed never smokers per school ranged from 3 to 232, class-sizes ranged from 1 to 26.

### Survey implementation

Data were collected through self-completed anonymous questionnaires during one school hour (45 min. period), administered by trained research staff. Only students with written parental consent were qualified for participation, parent consent forms were disseminated by class teachers three weeks prior to the baseline assessment. Students did not receive incentives for participation and irrespective of parental consent all students were free to



1  
2  
3 refuse participation (none refused). Class teachers assigned tasks for students that did not  
4 participate. After completion of the survey, questionnaires were placed in an envelope and  
5 sealed in front of the class. Students were assured that their individual information would not  
6 be seen by parents or teachers. To permit a linking of the baseline and follow-up  
7 questionnaires, students generated an anonymous seven-digit individual code, a procedure  
8 that had been tested in previous studies, slightly modified for this study.<sup>11</sup> Implementation  
9 was approved by all Ministries of Cultural Affairs of the three involved states, and ethical  
10 approval was obtained from the Ethical Committee of the Medical Faculty of the University of  
11 Kiel (Ref.: D 417/08).  
12  
13  
14  
15  
16  
17  
18  
19  
20  
21  
22  
23

## 24 Measures

### 25 *Advertising exposure*

26  
27 Advertising exposure has been operationalized in numerous ways across studies.<sup>4</sup> It has  
28 been measured both in terms of the physical presence of advertisements in individuals'  
29 environments and in terms of the psychological processes underlying individuals' memories  
30 for these advertisements.<sup>12</sup> In the present study we approximated the individual advertising  
31 contact frequency by providing masked colored images of billboard ads for cigarettes and  
32 fixed-images of TV commercials for non-tobacco ads **with all brand-identifying content**  
33 **digitally removed**, asking the students to rate how often they have ever seen each ad extract  
34 (on a 4-point scale with scale points 0="Never," 1="1 to 4 times," 2="5 to 10 times" and  
35 3="More than 10 times"). The answers were post-coded as 0=0, 1=2.5, 2=7.5, and 3=11 and  
36 summed up to create the tobacco and non-tobacco ad scales, respectively.  
37  
38  
39  
40  
41  
42  
43  
44  
45  
46  
47  
48  
49

50 The images included six cigarette brands, and eight "control" ads for products that included  
51 sweets, clothes, mobile phones, and cars. The following cigarette brands were included in  
52 the survey (with ad theme or cue in parentheses): (1) Marlboro (cowboy; horses); (2) F6  
53 (sunrise); (3) Gauloises (couple); (4) Pall Mall (Empire State Building); (5) L&M (couple); (6)  
54 Lucky Strike (cigarette packs). These six cigarette brands are among the eight most popular  
55  
56  
57  
58  
59  
60

1  
2  
3 cigarette brands in Germany.<sup>13</sup> For other commercial products, the following ads were  
4 included in the survey (with product type and ad theme or cue in parentheses): (1) Jack  
5 Wolfskin (trekking-clothing; climber); (2) Volkswagen (car; the performer Seal); (3) Tic Tac  
6 (candy; elevator); (4) Dr. Best (tooth brush; tomato); (5) Kinder Pingui (chocolate bar;  
7 penguins); (6) T-Mobile (mobile phone; dog); (7) Spee (detergent; fox); (8) Toyota (car).  
8 Advertising selection was based on a pilot study on 28 tobacco and non-tobacco ads (110  
9 students aged 11 to 16 years, mean age 13.6 years), selecting the half of ads that revealed  
10 neither ceiling nor floor effects and had corrected item-test correlations above  $r_{it}=0.40$ .  
11  
12

13  
14 We assessed ad exposure to non-tobacco products to control for the propensity to be  
15 receptive or attentive to advertising in general, which could confound the relation between  
16 tobacco-specific advertising exposure and smoking behavior.  
17  
18  
19

### 20 *Smoking behavior*

21  
22 We assessed lifetime smoking experience by asking "How many cigarettes have you smoked  
23 in your life?" (never smoked, just a few puffs, 1-19 cigarettes, 20-100 cigarettes, >100  
24 cigarettes).<sup>14</sup> Students that indicated any smoking at baseline, even just a few puffs, were  
25 excluded from the analysis. Having smoked more than 100 cigarettes at the follow-up  
26 assessment was defined as being an established smoker. Current smoking frequency was  
27 measured by asking, "How often do you smoke at present?" to which respondents could  
28 answer, "I don't smoke," "less than once a month," "at least once a month, but not weekly,"  
29 "at least once a week, but not daily," or "daily." For the present analysis, this variable was  
30 dichotomized into daily and non-daily smoking. **To account for different smoking susceptibility  
31 in never-smokers at baseline we also assessed future use intentions ("Do you think you will  
32 ever smoke in the future?") and refusal intentions ("If one of your friends offered you a  
33 cigarette, would you take it?"), with response categories "Definitely not", "Probably not",  
34 "Probably yes", and "Definitely yes".<sup>15</sup>**  
35  
36  
37  
38  
39  
40  
41  
42  
43  
44  
45  
46  
47  
48  
49  
50  
51  
52  
53  
54  
55  
56  
57  
58  
59  
60

### *Covariates*

Covariate measures were derived from studies that focus on risk factors of adolescent tobacco use, to control for confounding variables that would be theoretically related to ad exposure and the smoking measures.<sup>16-18</sup>

Sociodemographics: age, gender, study region, and socioeconomic status (SES); SES of the students was approximated with a combination of student and class teacher ratings:

Students answered three items of the PISA cultural and social capital assessment,<sup>19</sup> asking for the number of books in the household (5-point scale from 0 = "None" to 4 = "More than 100") and parenting characteristics ("My parents always know where I am" and "My parents know other parents from my school"), class teachers filled out an 11-item school evaluation sheet related to SES of their students (examples: "Most students of the school live in families with financial problems", "Most students of the school come from underprivileged families", "Our school has a good reputation", scale range from 0 = "Not true at all" to 3 = "Totally true", Cronbach's alpha = 0.85); student and teacher ratings positively correlated  $r = 0.57$ , alpha = 0.72.

Personal characteristics: self-reported school performance ("How would you describe your grades last year?", scale points "excellent", "good", "average", "below average"); average TV screen time ("How many hours do you usually watch TV in your leisure time?", scale points: "none", "about half an hour", "about an hour", "about two hours", "about three hours", "about four hours", "more than four hours a day"); rebelliousness and sensation-seeking, assessed with four items combined into a single index, with higher scores indicating greater propensity for rebelliousness and sensation seeking<sup>20</sup> ("I get in trouble in school"; "I do things my parents wouldn't want me to do"; "I like scary things"; "I like to do dangerous things", scale points 0 = "not at all like me", 1 = "a little like me", 2 = "pretty much like me", and 3 = "exactly like me", Cronbach's alpha = 0.76).

1  
2  
3 Social environment: parent smoking (0 = “No”, 1 = “Yes, 2) and peer smoking (0 = “None”, 1  
4 = “Some, 2 = “Most”, 3 = “All”). As mentioned above, we also controlled for the adolescent’s  
5 ability to recall advertising in general with the non-tobacco ad scale.  
6  
7

### 8 9 **Statistical analysis**

10  
11 All data analyses were conducted with Stata version 12.0 (Stata Corp, College Station, TX).  
12

13  
14 Chi-squared tests and T-tests were performed to check whether subjects included in the  
15 analysis differed systematically from those not reached at the follow-up assessment.  
16

17  
18 Bivariate associations between the study variables were analyzed using Spearman rank  
19 correlations. The multivariate associations between amount of advertising exposure and  
20 smoking initiation were analyzed with Poisson regressions. Poisson regression allows for the  
21 presentation of adjusted Incidence Rate Ratios (IRRs) and 95% confidence intervals (CIs) for  
22 the relationship between exposure to advertising and smoking at follow-up, having the  
23 advantage of not being influenced by the prevalence of the exposure. IRRs were calculated  
24 for every 10 advertising contacts, indicating the relative increase in smoking incidence  
25 (established smoking and daily smoking) for each additional 10 contacts. The dichotomized  
26 outcome variables were regressed on advertising exposure after inclusion of all covariates  
27 and with clustered robust standard errors to account for intra-class correlations within  
28 schools. In a subsequent analysis we repeated the Poisson regressions with advertising  
29 contact frequency being parsed into tertiles to account for the skewed distribution of tobacco  
30 advertising contact and to replicate the approach used in our previous analysis.<sup>9</sup> Missing  
31 data were handled by listwise deletion.  
32  
33  
34  
35  
36  
37  
38  
39  
40  
41  
42  
43  
44  
45  
46  
47  
48  
49

## 50 **RESULTS**

### 51 52 **Descriptive statistics at baseline and attrition analysis**

53  
54 Table 1 gives descriptive statistics for all interviewed never smokers at baseline, for those  
55 lost to follow-up, and the final analyzed sample, allowing comparisons of differences due to  
56  
57  
58  
59  
60

attrition. Never smokers lost to follow-up were significantly younger of age, more often male, had lower scores on the SES scale, rated their school performance more poorly, had higher scores in sensation seeking/rebelliousness and more often reported at least one parent who smoked. No differences were found with regard to tobacco or non-tobacco advertising contact.

**Table 1.** Descriptive sample statistics at baseline and attrition analysis.

|                                            | Baseline never smokers<br>(n=2346)<br>% | Lost to follow-up<br>(n=1026)<br>% | Analyzed Sample<br>(n=1320)<br>% | p     |
|--------------------------------------------|-----------------------------------------|------------------------------------|----------------------------------|-------|
| <b>Sociodemographics</b>                   |                                         |                                    |                                  |       |
| Age at baseline, mean (SD)                 | 12.24 (1.01)                            | 12.16 (1.09)                       | 12.30 (0.93)                     | .001  |
| Gender: Female                             | 54.9                                    | 51.9                               | 57.3                             | .008  |
| SES: Below Median                          | 51.1                                    | 60.6                               | 43.8                             | <.001 |
| <b>State</b>                               |                                         |                                    |                                  |       |
| Schleswig-Holstein                         | 41.6                                    | 39.8                               | 43.0                             | .279  |
| Hamburg                                    | 28.4                                    | 29.1                               | 27.8                             |       |
| Brandenburg                                | 30.0                                    | 31.1                               | 29.2                             |       |
| <b>Personal characteristics</b>            |                                         |                                    |                                  |       |
| <b>School performance</b>                  |                                         |                                    |                                  |       |
| Below average                              | 2.5                                     | 3.7                                | 1.5                              | <.001 |
| Average                                    | 33.7                                    | 37.8                               | 30.6                             |       |
| Good                                       | 49.9                                    | 44.9                               | 53.9                             |       |
| Excellent                                  | 13.9                                    | 13.6                               | 14.0                             |       |
| <b>TV screen time</b>                      |                                         |                                    |                                  |       |
| ≤ 30 min                                   | 16.8                                    | 15.5                               | 17.8                             | .051  |
| 1-2 h                                      | 59.5                                    | 58.8                               | 60.1                             |       |
| 3-4 h                                      | 19.0                                    | 19.8                               | 18.3                             |       |
| > 4 h                                      | 4.7                                     | 5.9                                | 3.8                              |       |
| Sensation seeking and                      | 0.53 (0.50)                             | 0.56 (0.51)                        | 0.50 (0.49)                      | .010  |
| <b>Social environment</b>                  |                                         |                                    |                                  |       |
| Peer smoking: None                         | 71.7                                    | 71.5                               | 71.9                             | .858  |
| Parent smoking: No                         | 53.3                                    | 49.3                               | 56.4                             | .001  |
| <b>Advertising exposure</b>                |                                         |                                    |                                  |       |
| <b>Tobacco advertising, range 0-55</b>     |                                         |                                    |                                  |       |
| Low (< 1)                                  | 35.3                                    | 35.3                               | 35.4                             | .600  |
| Medium (1 - 10)                            | 38.7                                    | 39.7                               | 38.0                             |       |
| High (> 10)                                | 26.0                                    | 25.0                               | 26.6                             |       |
| <b>Non-tobacco advertising, range 0-88</b> |                                         |                                    |                                  |       |
| Low (< 35)                                 | 39.8                                    | 40.8                               | 39.0                             | .469  |
| Medium (35 – 54)                           | 32.1                                    | 32.4                               | 32.0                             |       |
| High (> 54)                                | 28.1                                    | 26.8                               | 29.0                             |       |

### Smoking initiation during the observational period

Thirty months after the baseline assessment 436 never smokers reported trying cigarette smoking including a few puffs (33% incidence rate), 138 reported smoking in the past 30 days (10.5% incidence rate), Sixty-six had smoked more than 100 cigarettes and were classified as established smokers (incidence rate 5%), and 58 reported daily smoking (incidence rate 4.4%). Daily smoking incidence was not significantly related to age ( $p=0.526$ ) or sex ( $p=0.153$ ), with 33% of the daily smokers at follow-up being 14 years of age or younger and 24% being 16 or older.

### Exposure to advertisements at baseline

**Table 2.** Contact frequency for tobacco and non-tobacco advertisements (n = 1320 never smokers at baseline)

|                                       | Seen at least<br>once<br>% | Seen more than<br>10 times<br>% |
|---------------------------------------|----------------------------|---------------------------------|
| <b>Tobacco ads (product type)</b>     |                            |                                 |
| Lucky Strike (cigarettes)             | 49                         | 13                              |
| Marlboro (cigarettes)                 | 28                         | 6                               |
| Pall Mall (cigarettes)                | 24                         | 6                               |
| Gauloises (cigarettes)                | 19                         | 2                               |
| L&M (cigarettes)                      | 18                         | 4                               |
| F6 (cigarettes)                       | 12                         | 1                               |
| <b>Non-tobacco ads (product type)</b> |                            |                                 |
| Kinder Pingui (sweet)                 | 96                         | 71                              |
| Tic Tac (candy)                       | 87                         | 44                              |
| Dr. Best (tooth brush)                | 83                         | 36                              |
| T-Mobile (mobile phone)               | 85                         | 35                              |
| Spee (detergent)                      | 76                         | 24                              |
| Volkswagen (car)                      | 50                         | 14                              |
| Toyota (car)                          | 54                         | 10                              |
| Jack Wolfskin (trekking-clothing)     | 45                         | 9                               |

Table 2 gives contact frequencies (how often the students had seen the ad) for all advertised products at baseline. The cigarette ad with the highest contact frequency was Lucky Strike, for which about half of the sample reported at least one contact. The lowest tobacco ad

1  
2  
3 contact frequency rate was found for F6, a regional German cigarette brand sold mainly in  
4 eastern Germany. Ad contact frequency for non-tobacco products was generally much higher  
5 than for tobacco products. For example, almost all students (96%) reported having seen the  
6 ad for Kinder Pingui, a chocolate bar. The range of the sum of contacts over all depicted  
7 advertisements was 0 to 55 (mean=7.9) for the tobacco ads, and 0 to 88 (mean=42.2) for the  
8 non-tobacco ads, also reflecting the lower number of tobacco ads (6 vs. 8).  
9  
10  
11  
12  
13  
14

### 15 16 **Zero order associations**

17  
18  
19 Table 3 shows pairwise Spearman rank correlations between the study variables,  
20 demonstrating significant crude associations between the assessed covariates and smoking  
21 behavior as well as between covariates and advertising contact, justifying their inclusion in  
22 the multivariate analyses. The highest correlations with all smoking outcomes was found for  
23 peer smoking, followed by tobacco advertising contact. There were some differences in the  
24 correlational pattern between tobacco and non-tobacco advertising contact. Compared to the  
25 amount of contact with tobacco ads, non-tobacco advertising exposure was stronger related  
26 to age and showed no association with gender, and also had a stronger correlation with SES,  
27 TV screen time, and parental smoking. The zero-order correlation between tobacco and non-  
28 tobacco advertising contact indicated a proportion of about 20% shared variance.  
29  
30  
31  
32  
33  
34  
35  
36  
37  
38  
39

### 40 41 **Association between advertising contact and smoking initiation**

42  
43  
44 Figures 1a and 1b show the adjusted predictions of established smoking and daily smoking  
45 based on the amount of tobacco and non-tobacco advertising contact. The curves illustrate  
46 an increasing risk for the two smoking outcomes dependent on the amount of tobacco ad  
47 contact, but not for non-tobacco advertising contact.  
48  
49  
50  
51  
52  
53  
54

55  
56  
57  
58  
59  
60  
Insert Figures 1a and 1b about here

**Table 3.** Zero-order correlation matrix for all study variables.

|                                        | 1.             | 2.             | 3.              | 4.             | 5.             | 6.             | 7.             | 8.             | 9.             | 10.            | 11.            | 12.            | 13.            | 14.            |
|----------------------------------------|----------------|----------------|-----------------|----------------|----------------|----------------|----------------|----------------|----------------|----------------|----------------|----------------|----------------|----------------|
| 1. Age                                 | 1.00           |                |                 |                |                |                |                |                |                |                |                |                |                |                |
| 2. Gender<br>(0=female, 1=male)        | 0.02           | 1.00           |                 |                |                |                |                |                |                |                |                |                |                |                |
| 3. SES                                 | <b>-0.07*</b>  | 0.02           | 1.00            |                |                |                |                |                |                |                |                |                |                |                |
| 4. Region<br>(0=west, 1=east)          | <b>0.25***</b> | -0.01          | <b>-0.10*</b>   | 1.00           |                |                |                |                |                |                |                |                |                |                |
| 5. School<br>performance               | <b>0.11***</b> | 0.03           | <b>-0.16***</b> | -0.05          | 1.00           |                |                |                |                |                |                |                |                |                |
| 6. TV screen time                      | <b>0.17***</b> | <b>0.07**</b>  | <b>-0.30***</b> | <b>0.25***</b> | <b>0.15***</b> | 1.00           |                |                |                |                |                |                |                |                |
| 7. Sensation seeking                   | <b>0.09***</b> | <b>0.24***</b> | -0.03           | 0.01           | <b>0.16***</b> | <b>0.18***</b> | 1.00           |                |                |                |                |                |                |                |
| 8. Peer smoking                        | <b>0.28***</b> | 0.02           | <b>-0.22***</b> | <b>0.28***</b> | <b>0.15***</b> | <b>0.24***</b> | <b>0.24***</b> | 1.00           |                |                |                |                |                |                |
| 9. Parent smoking                      | 0.04           | -0.02          | <b>-0.26***</b> | <b>0.09***</b> | <b>0.11**</b>  | <b>0.22***</b> | <b>0.08**</b>  | <b>0.17***</b> | 1.00           |                |                |                |                |                |
| 10. Tobacco ad<br>exposure             | <b>0.14***</b> | <b>0.13***</b> | 0.02            | <b>-0.06*</b>  | 0.05           | <b>0.11**</b>  | <b>0.24***</b> | <b>0.13***</b> | <b>0.08**</b>  | 1.00           |                |                |                |                |
| 11. Non-tobacco ad<br>exposure         | <b>0.20***</b> | 0.05           | <b>-0.08**</b>  | <b>0.11**</b>  | <b>0.06*</b>   | <b>0.36***</b> | <b>0.21***</b> | <b>0.18***</b> | <b>0.18***</b> | <b>0.44***</b> | 1.00           |                |                |                |
| 12. Ever smoking                       | <b>0.15***</b> | 0.01           | <b>-0.17***</b> | <b>0.14***</b> | <b>0.09**</b>  | <b>0.14***</b> | <b>0.18***</b> | <b>0.24***</b> | <b>0.13***</b> | <b>0.19***</b> | <b>0.15***</b> | 1.00           |                |                |
| 13. Past 30 days<br>smoking            | <b>0.09**</b>  | -0.02          | <b>-0.12**</b>  | <b>0.08**</b>  | <b>0.06*</b>   | <b>0.12**</b>  | <b>0.15***</b> | <b>0.21***</b> | <b>0.14***</b> | <b>0.17***</b> | <b>0.12***</b> | <b>0.61***</b> | 1.00           |                |
| 14. Established<br>smoking (>100 cig.) | <b>0.07*</b>   | <b>0.09**</b>  | <b>-0.07*</b>   | <b>0.08**</b>  | 0.05           | <b>0.10*</b>   | <b>0.12**</b>  | <b>0.16***</b> | <b>0.09***</b> | <b>0.13***</b> | <b>0.09**</b>  | <b>0.33***</b> | <b>0.51***</b> | 1.00           |
| 15. Daily smoking                      | 0.02           | 0.04           | <b>-0.14***</b> | <b>0.08**</b>  | <b>0.07*</b>   | <b>0.10*</b>   | <b>0.09**</b>  | <b>0.14***</b> | <b>0.13***</b> | <b>0.08**</b>  | 0.03           | <b>0.30***</b> | <b>0.49***</b> | <b>0.75***</b> |

Bold figures == significant associations

\*p<0.05; \*\*p<0.01; \*\*\*p<0.001



1  
2  
3 The Figures also report the adjusted incidence rate ratios associated with an increase in  
4 advertising exposure. There was an adjusted IRR for established smoking of 1.38 (95% CI  
5 1.16, 1.63;  $p < 0.001$ ) for each additional 10 tobacco ad contacts and 1.00 (95% CI 0.84, 1.19;  
6  
7  $p = 0.996$ ) for each additional 10 non-tobacco ad contacts. For daily smoking, the  
8  
9 corresponding IRRs were 1.30 (95% CI 1.03, 1.64;  $p = 0.029$ ) for 10 tobacco ad contacts and  
10  
11 0.92 (95% CI 0.79, 1.08;  $p = 0.296$ ) for 10 non-tobacco ad contacts, respectively.  
12  
13

14  
15 Due to the skewed distribution of tobacco ad contact frequency (more than half of the never-  
16 smoking students had fewer than 10 contacts), we repeated the analysis using contact  
17 frequency parsed into tertiles, representing relative low (0-2.5), medium (5-10), and high (11-  
18 55) advertising contact. For established smoking the adjusted IRRs were 1.52 for tobacco  
19 ads (95% CI 1.14, 2.03;  $p = 0.004$ ) and 1.05 for non-tobacco ads (95% CI 0.68, 1.62;  
20  
21  $p = 0.819$ ). Using daily smoking as outcome variable the IRRs were 1.43 (95% CI 1.08, 1.90;  
22  
23  $p = 0.012$ ) and 0.84 (95% CI 0.58, 1.22;  $p = 0.363$ ) for each additional tertile of tobacco and  
24  
25 non-tobacco advertising contact. These IRRs relate to 3.1%, 4.8%, and 7.3% established  
26  
27 smoking attributable incidence rate or 3.1%, 4.6%, and 6.4% daily smoking incidence for low,  
28  
29 medium, and high tobacco advertising contact, respectively, assuming the adjusted analysis  
30  
31 adequately controlled for third variable influence.  
32  
33  
34  
35  
36  
37  
38

39 To address the question if some never smokers had higher tobacco advertising contact  
40 because they were already more susceptible towards smoking at baseline, we conducted a  
41 sensitivity analysis with only never smokers with low susceptibility. These students reported  
42 that they will definitely never smoke in the future and will definitely not try cigarettes if a friend  
43 offered one ( $n = 803$ ). In this restricted sub-sample the adjusted IRR for each additional 10  
44 tobacco ad contacts was 1.37 for established smoking (95% CI 1.07, 1.76;  $p = 0.012$ ) and  
45 1.33 for daily smoking (95% CI 1.02, 1.75;  $p = 0.038$ ). Again, no significant associations were  
46  
47 found for non-tobacco advertisings.  
48  
49  
50  
51  
52  
53  
54  
55  
56  
57  
58  
59  
60

## DISCUSSION

This longitudinal study is a further test of the relationship between tobacco advertising exposure and youth smoking behavior, confirming the specificity of the advertising-smoking link by comparing the effects of tobacco versus non-tobacco advertising. The study extends previous work by using two less prevalent outcome measures (established and daily smoking) and a longer follow-up period of 2.5 years, measures likely to indicate an addiction component to the smoking.<sup>21</sup> Compared to the results reported on smoking initiation in terms of ever smoking (even a few puffs),<sup>9</sup> the increase in the adjusted relative risk for daily smoking dependent on tobacco advertising exposure was even more pronounced. Specificity was shown by the finding that tobacco advertising at baseline predicted these outcomes independent of the amount of general advertising contact and after controlling for a number of well-known risk factors for smoking initiation. This result confirms the content-specific association between tobacco advertising and smoking behaviour and underlines that tobacco advertising exposure is not simply a marker for adolescents that are generally more receptive or attentive towards marketing.

This longitudinal study also clearly points out the implications of partial tobacco advertising bans in countries like the United States and Germany. The one-third of adolescents in the highest tertile of advertising had rates of daily and established smoking that were double (3 percentage points higher) than adolescents in the first tertile. In reverse, assuming that the models were fully adjusted for other confounding influences, one might expect a significant further decrease in the rates of smoking in these countries after a total elimination of tobacco advertising.

Some limitations of the study have to be considered. There was a severe loss of students during the 30 months interval (44%). To a large degree the drop-out was due to organizational issues (e.g., school and class changes) that are unlikely systematically related to advertising exposure or smoking behavior on the individual level. However, the lost students differed on a couple of dimensions from the retained students, i.e., age, gender,

1  
2  
3 socio-economic status, school performance, sensation seeking, and parental smoking. With  
4  
5 the exception of the lower age, the drop-out markers indicate that lower risk adolescents  
6  
7 were more likely to be retained. This might have biased the results as the effect of one risk  
8  
9 factor might not be independent of other risk factors. Generally, one would assume that the  
10  
11 associations get more conservative if higher risk adolescents are excluded, because this  
12  
13 group has a higher likelihood of starting to smoke. However, in the context of media effects  
14  
15 on smoking initiation there is also evidence that lower risk adolescents have a higher  
16  
17 responsiveness towards media effects<sup>22,23</sup>, indicating that the present results might not be  
18  
19 generalised to the whole population of adolescents. Second, as with any observational study,  
20  
21 the results may be biased by unmeasured confounding – that is, an unmeasured risk factor  
22  
23 could alter the estimates reported for the association between tobacco advertising and  
24  
25 smoking onset. Third, the memory-based measure of ad exposure could be biased by  
26  
27 memory effects other than the ones we controlled for. The potential to remember ads (in  
28  
29 terms of contact frequency) should, however, not be completely independent of actual  
30  
31 exposure. Finally, because the implemented method did not use a representative sample of  
32  
33 all broadcasted ads, it does not allow for an accurate estimation of the total amount of  
34  
35 tobacco and non-tobacco advertising exposure or the advertising pressure of specific brands.  
36  
37 This is amplified by the modification of the stimulus material which did not contain any brand  
38  
39 information.

40  
41  
42 The finding that exposure to tobacco advertising predicts smoking in youth could have  
43  
44 important public health implications. A total ban of tobacco advertising and promotion around  
45  
46 the world is one key policy measure of the WHO Framework Convention on Tobacco Control  
47  
48 (FCTC)<sup>24</sup>. Under Article 13.1 of the FCTC, 'Parties recognize that a comprehensive ban on  
49  
50 advertising, promotion and sponsorship would reduce the consumption of tobacco products'.  
51  
52 Data from this study support this measure, because only exposure to tobacco  
53  
54 advertisements predicted smoking initiation, which cannot be attributed to a general  
55  
56 receptiveness to marketing and because it shows that advertising allowed under partial bans  
57  
58 is still reaching adolescents.  
59  
60

## STATEMENTS

### Licence

The Corresponding Author has the right to grant on behalf of all authors and does grant on behalf of all authors, an exclusive licence (or non-exclusive for government employees) on a worldwide basis to the BMJ Group and co-owners or contracting owning societies (where published by the BMJ Group on their behalf), and its Licensees to permit this article (if accepted) to be published in BMJ and any other BMJ Group products and to exploit all subsidiary rights, as set out in our licence.

### Funding

This study was financed by DAK-Gesundheit, a German health insurance firm.

### Acknowledgement

We like to thank Mandy Gauditz, Lars Grabbe, Sven Heid, Frank Kirschneck, Carmen and Sarah Koynowski, Detlef Kraut, Corinna Liefeld, Karin Maruska, Danuta Meinhardt, Marc Räder, Jan Sängler, and Gesa Sander for assessing the data.

### Competing interests:

None.

### Contributors:

Conception and design of the study: All authors

Analysis and interpretation of data: MM, RH

1  
2  
3 Collection and assembly of data: MM, BI

4  
5 Drafting of the article: MM, JS, RH

6  
7 Critical revision of the article for important intellectual content: All authors

8  
9 Final approval of the article: All authors

10  
11  
12  
13  
14 All authors have full access to all of the data (including statistical reports and tables) in the  
15 study and can take responsibility for the integrity of the data and the accuracy of the data  
16 analysis.  
17  
18  
19

20  
21  
22  
23 Study implementation was approved by the Ethical Committee of the Medical Faculty of the  
24 University of Kiel (Ref.: D 417/08).  
25  
26  
27

28  
29  
30 **Data sharing:** No additional data available.  
31  
32  
33  
34  
35  
36  
37  
38  
39  
40  
41  
42  
43  
44  
45  
46  
47  
48  
49  
50  
51  
52  
53  
54  
55  
56  
57  
58  
59  
60

## References

- (1) Brandt AM. The cigarette century: The rise, fall and deadly persistence of the product that defined America. New York, NY: Basic Books; 2007.
- (2) Pollay RW. Targeting youth and concerned smokers: evidence from Canadian tobacco industry documents. *Tob Control* 2000; 9(2):136-147.
- (3) U.S. Department of Health and Human Services. Preventing tobacco use among youth and young adults: A report of the Surgeon General. Atlanta, GA: U.S. Department of Health and Human Services, Centers for Disease Control and Prevention, National Center for Chronic Disease Prevention and Health Promotion, Office on Smoking and Health; 2012.
- (4) Lovato C, Watts A, Stead LF. Impact of tobacco advertising and promotion on increasing adolescent smoking behaviours. *Cochrane Database Syst Rev* 2011;(10):CD003439.
- (5) Henriksen L. Comprehensive tobacco marketing restrictions: promotion, packaging, price and place. *Tob Control* 2012; 21(2):147-153.
- (6) Strasburger VC. Policy statement--children, adolescents, substance abuse, and the media. *Pediatrics* 2010; 126(4):791-799.
- (7) Hill AB. The environment and disease: association or causation? *Proc R Soc Med* 1965; 58:295-300.
- (8) Hanewinkel R, Isensee B, Sargent JD, Morgenstern M. Cigarette advertising and adolescent smoking. *Am J Prev Med* 2010; 38(4):359-366.
- (9) Hanewinkel R, Isensee B, Sargent JD, Morgenstern M. Cigarette advertising and teen smoking initiation. *Pediatrics* 2011; 127(2):e271-e278.
- (10) Kenford SL, Wetter DW, Welsch SK, Smith SS, Fiore MC, Baker TB. Progression of college-age cigarette samplers: what influences outcome. *Addict Behav* 2005; 30(2):285-294.
- (11) Galanti MR, Siliquini R, Cuomo L, Melero JC, Panella M, Faggiano F. Testing anonymous link procedures for follow-up of adolescents in a school-based trial: The EU-DAP pilot study. *Prev Med* 2007; 44(2):174-177.
- (12) Klitzner M, Gruenewald PJ, Bamberger E. Cigarette advertising and adolescent experimentation with smoking. *Br J Addict* 1991; 86(3):287-298.
- (13) Deutsches Krebsforschungszentrum. The Tobacco Atlas Germany 2009. Heidelberg: Deutsches Krebsforschungszentrum (in German); 2009.
- (14) Bondy SJ, Victor JC, Diemert LM. Origin and use of the 100 cigarette criterion in tobacco surveys. *Tob Control* 2009; 18(4):317-323.

- 1  
2  
3 (15) Pierce JP, Choi WS, Gilpin EA, Merritt RK, Farkas AJ. Validation of susceptibility as a  
4 predictor of which adolescents take up smoking in the United States. *Health Psychol*  
5 1996; 15:355-361.  
6  
7 (16) Gibbons FX, Gerrard M. Predicting young adults' health risk behavior. *J Pers Soc*  
8 *Psychol* 1995; 69(3):505-517.  
9  
10 (17) Hawkins JD, Catalano RF, Miller JY. Risk and protective factors for alcohol and other  
11 drug problems in adolescence and early adulthood: implications for substance abuse  
12 prevention. *Psychol Bull* 1992; 112(1):64-105.  
13  
14 (18) Petraitis J, Flay BR, Miller TQ. Reviewing theories of adolescent substance use:  
15 organizing pieces in the puzzle. *Psychol Bull* 1995; 117(1):67-86.  
16  
17 (19) Kunter M, Schümer G, Artelt C, Baumert J, Klieme E, Neubrand M et al. Pisa 2000:  
18 Dokumentation der Erhebungsinstrumente (Pisa 2000: Documentation of measures).  
19 Berlin: Max-Planck-Institut für Bildungsforschung (in German); 2002.  
20  
21 (20) Russo MF, Stokes GS, Lahey BB, Christ MAG, McBurnett K, Loeber R et al. A  
22 sensation seeking scale for children: Further refinement and psychometric  
23 development. *J Psychopathol Behav Assess* 1993; 15:69-85.  
24  
25 (21) Sargent JD, Mott LA, Stevens M. Predictors of smoking cessation in adolescents.  
26 *Arch Pediatr Adolesc Med* 1998; 152(4):388-393.  
27  
28 (22) Dalton MA, Sargent JD, Beach ML, Titus-Ernstoff L, Gibson JJ, Ahrens MB et al.  
29 Effect of viewing smoking in movies on adolescent smoking initiation: a cohort study.  
30 *Lancet* 2003; 362(9380):281-285.  
31  
32 (23) Hanewinkel R, Sargent JD. Exposure to smoking in internationally distributed  
33 American movies and youth smoking in Germany: a cross-cultural cohort study.  
34 *Pediatrics* 2008; 121(1):e108-e117.  
35  
36 (24) Shibuya K, Ciecierski C, Guindon E, Bettcher DW, Evans DB, Murray CJ. WHO  
37 Framework Convention on Tobacco Control: development of an evidence based  
38 global public health treaty. *BMJ* 2003; 327(7407):154-157.  
39  
40  
41  
42  
43  
44  
45  
46  
47  
48  
49  
50  
51  
52  
53  
54  
55  
56  
57  
58  
59  
60

1  
2  
3 **Figure legend**  
4  
5  
6  
7

8 **Figures 1a and 1b**

9 ----- Tobacco advertising      — Non-tobacco advertising  
10

11 IRR = Incidence Rate Ratio for 10 additional advertising contacts

12 Figures in brackets = 95% Confidence Interval

13 n.s. = not significant; \* $p < .05$ ; \*\*\* $p < .001$   
14  
15  
16  
17  
18  
19  
20  
21  
22  
23  
24  
25  
26  
27  
28  
29  
30  
31  
32  
33  
34  
35  
36  
37  
38  
39  
40  
41  
42  
43  
44  
45  
46  
47  
48  
49  
50  
51  
52  
53  
54  
55  
56  
57  
58  
59  
60



1  
2  
3  
4  
5  
6  
7  
8  
9  
10  
11  
12  
13  
14  
15  
16  
17  
18  
19  
20  
21  
22  
23  
24  
25  
26  
27  
28  
29  
30  
31  
32  
33  
34  
35  
36  
37  
38  
39  
40  
41  
42  
43  
44  
45  
46  
47  
48  
49  
50  
51  
52  
53  
54  
55  
56  
57  
58  
59  
60



143x104mm (300 x 300 DPI)

View only

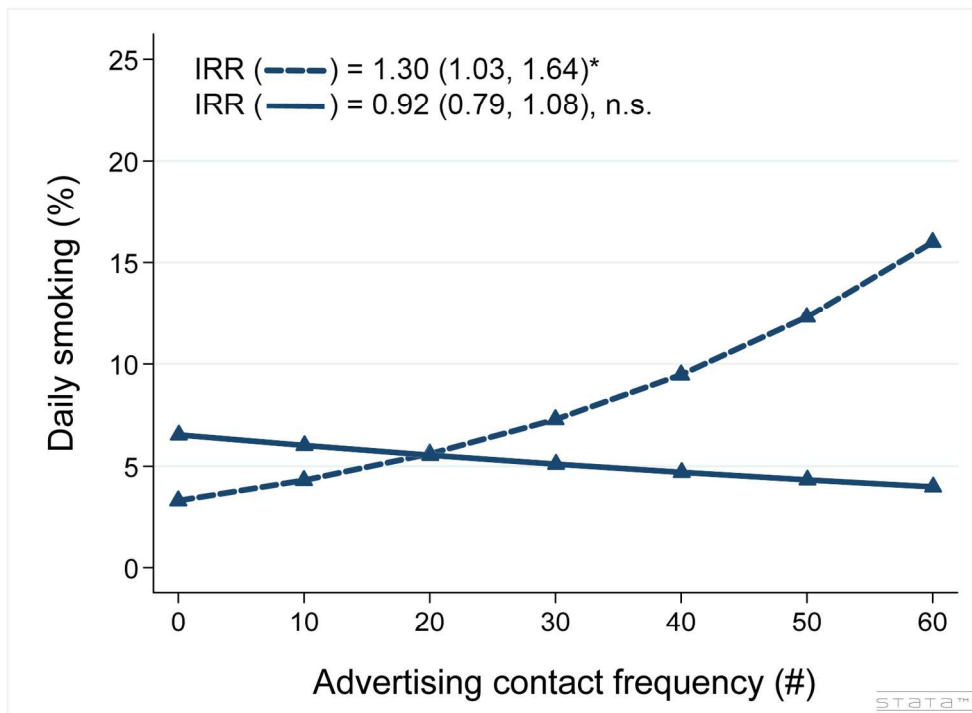

143x104mm (300 x 300 DPI)

View only

**STROBE statement**

Manuscript entitled "From never to daily smoking in 30 months:  
The predictive value of tobacco and non-tobacco advertising exposure"

|                           | Item No | Recommendation                                                                                                                                                                       | Manuscript page |
|---------------------------|---------|--------------------------------------------------------------------------------------------------------------------------------------------------------------------------------------|-----------------|
| <b>Title and abstract</b> |         |                                                                                                                                                                                      |                 |
|                           | 1       | (a) Indicate the study's design with a commonly used term in the title or the abstract                                                                                               | 2               |
|                           |         | (b) Provide in the abstract an informative and balanced summary of what was done and what was found                                                                                  | 2               |
| <b>Introduction</b>       |         |                                                                                                                                                                                      |                 |
| Background/rationale      | 2       | Explain the scientific background and rationale for the investigation being reported                                                                                                 | 4               |
| Objectives                | 3       | State specific objectives, including any prespecified hypotheses                                                                                                                     | 4, 5            |
| <b>Methods</b>            |         |                                                                                                                                                                                      |                 |
| Study design              | 4       | Present key elements of study design early in the paper                                                                                                                              | 6               |
| Setting                   | 5       | Describe the setting, locations, and relevant dates, including periods of recruitment, exposure, follow-up, and data collection                                                      | 6               |
| Participants              | 6       | (a) Give the eligibility criteria, and the sources and methods of selection of participants. Describe methods of follow-up                                                           | 6               |
| Variables                 | 7       | Clearly define all outcomes, exposures, predictors, potential confounders, and effect modifiers. Give diagnostic criteria, if applicable                                             | 7,8,9           |
| Data sources/measurement  | 8*      | For each variable of interest, give sources of data and details of methods of assessment (measurement). Describe comparability of assessment methods if there is more than one group | 7,8,9           |
| Bias                      | 9       | Describe any efforts to address potential sources of bias                                                                                                                            | 9               |
| Study size                | 10      | Explain how the study size was arrived at                                                                                                                                            | 6               |
| Quantitative variables    | 11      | Explain how quantitative variables were handled in the analyses. If applicable, describe which groupings were chosen and why                                                         | 7-9             |
|                           |         | (a) Describe all statistical methods, including those used to control for confounding                                                                                                | 9, 10           |
|                           |         | (b) Describe any methods used to examine subgroups and interactions                                                                                                                  | n/a             |
| Statistical methods       | 12      | (c) Explain how missing data were addressed                                                                                                                                          | 10              |
|                           |         | (d) If applicable, explain how loss to follow-up was addressed                                                                                                                       | 10              |
|                           |         | (e) Describe any sensitivity analyses                                                                                                                                                | 10              |

| <b>Results</b>           |     |                                                                                                                                                                                                              |                       |
|--------------------------|-----|--------------------------------------------------------------------------------------------------------------------------------------------------------------------------------------------------------------|-----------------------|
| Participants             | 13* | (a) Report numbers of individuals at each stage of study? eg numbers potentially eligible, examined for eligibility, confirmed eligible, included in the study, completing follow-up, and analysed           | 6                     |
|                          |     | (b) Give reasons for non-participation at each stage                                                                                                                                                         | 6                     |
|                          |     | (c) Consider use of a flow diagram                                                                                                                                                                           | --                    |
| Descriptive data         | 14* | (a) Give characteristics of study participants (eg demographic, clinical, social) and information on exposures and potential confounders                                                                     | Table 1               |
|                          |     | (b) Indicate number of participants with missing data for each variable of interest                                                                                                                          | Table 1               |
|                          |     | (c) Summarise follow-up time (eg, average and total amount)                                                                                                                                                  | 6                     |
| Outcome data             | 15* | Report numbers of outcome events or summary measures over time                                                                                                                                               | 10                    |
| Main results             | 16  | (a) Give unadjusted estimates and, if applicable, confounder-adjusted estimates and their precision (eg, 95% confidence interval). Make clear which confounders were adjusted for and why they were included | 8, 13, 15<br>Figure 1 |
|                          |     | (b) Report category boundaries when continuous variables were categorized                                                                                                                                    | 15                    |
|                          |     | (c) If relevant, consider translating estimates of relative risk into absolute risk for a meaningful time period                                                                                             | --                    |
| Other analyses           | 17  | Report other analyses done? eg analyses of subgroups and interactions, and sensitivity analyses                                                                                                              | --                    |
| <b>Discussion</b>        |     |                                                                                                                                                                                                              |                       |
| Key results              | 18  | Summarise key results with reference to study objectives                                                                                                                                                     | 16                    |
| Limitations              | 19  | Discuss limitations of the study, taking into account sources of potential bias or imprecision. Discuss both direction and magnitude of any potential bias                                                   | 16,17                 |
| Interpretation           | 20  | Give a cautious overall interpretation of results considering objectives, limitations, multiplicity of analyses, results from similar studies, and other relevant evidence                                   | 16,17                 |
| Generalisability         | 21  | Discuss the generalisability (external validity) of the study results                                                                                                                                        | 17                    |
| <b>Other information</b> |     |                                                                                                                                                                                                              |                       |
| Funding                  | 22  | Give the source of funding and the role of the funders for the present study and, if applicable, for the original study on which the present article is based                                                | 18                    |



**From never to daily smoking in 30 months: The predictive value of tobacco and non-tobacco advertising exposure**

|                                 |                                                                                                                                                                                                                                                    |
|---------------------------------|----------------------------------------------------------------------------------------------------------------------------------------------------------------------------------------------------------------------------------------------------|
| Journal:                        | <i>BMJ Open</i>                                                                                                                                                                                                                                    |
| Manuscript ID:                  | bmjopen-2013-002907.R2                                                                                                                                                                                                                             |
| Article Type:                   | Research                                                                                                                                                                                                                                           |
| Date Submitted by the Author:   | 29-Apr-2013                                                                                                                                                                                                                                        |
| Complete List of Authors:       | Morgenstern, Matthis; Institute for Therapy and Health Research, Sargent, James; Dartmouth Medical School<br>Isensee, Barbara; Institute for Therapy and Health Research, IFT-Nord, Hanewinkel, Reiner; Institute for Therapy and Health Research, |
| <b>Primary Subject Heading</b>: | Smoking and tobacco                                                                                                                                                                                                                                |
| Secondary Subject Heading:      | Public health                                                                                                                                                                                                                                      |
| Keywords:                       | EPIDEMIOLOGY, PREVENTIVE MEDICINE, PUBLIC HEALTH                                                                                                                                                                                                   |
|                                 |                                                                                                                                                                                                                                                    |

SCHOLARONE™  
Manuscripts

1  
2  
3 **From never to daily smoking in 30 months:**

4  
5 **The predictive value of tobacco and non-tobacco advertising exposure**

6  
7  
8  
9 Matthis Morgenstern, PhD <sup>1,2</sup>

10  
11 James D. Sargent, MD <sup>3</sup>

12  
13 Barbara Isensee, PhD <sup>1</sup>

14  
15 Reiner Hanewinkel, PhD <sup>1,2</sup>

16  
17  
18  
19 <sup>1</sup> Institute for Therapy and Health Research (IFT-Nord)  
20 Harmsstrasse 2  
21 24114 Kiel  
22 Germany

23  
24  
25 <sup>2</sup> Institute for Medical Psychology and Medical Sociology, University Medical Center  
26 Schleswig-Holstein, Campus Kiel  
27 Diesterwegstrasse 10-12  
28 24113 Kiel  
29 Germany

30  
31 <sup>3</sup> Geisel School of Medicine at Dartmouth  
32 Cancer Control Research Program  
33 Norris Cotton Cancer Center  
34 Lebanon, NH  
35 USA

36  
37  
38 Corresponding author:  
39 M. Morgenstern  
40 Institute for Therapy and Health Research (IFT-Nord)  
41 Harmsstrasse 2  
42 24114 Kiel  
43 Germany  
44 Phone: +49 431 570 29 35  
45 Fax: +49 431 570 29 29  
46 Mail: morgenstern@ift-nord.de

47  
48  
49  
50 **Keywords:** adolescence • cigarettes • marketing • advertising • longitudinal • Germany

51  
52  
53 Word count (text only): 3647

54  
55 Number of tables: 3

56  
57 Number of figures: 2

## ABSTRACT

**Objective:** To test the specificity of the association between tobacco advertising and youth smoking initiation.

**Design:** Longitudinal survey with a 30-months interval.

**Setting:** Twenty-one public schools in 3 German states.

**Participants:** A total of 1320 sixth- to eighth-grade students who were never-smokers at baseline (age range at baseline, 10-15 years; mean, 12.3 years).

**Exposures:** Exposure to tobacco and non-tobacco advertisements was measured at baseline with images of 6 tobacco and 8 non-tobacco advertisements; students indicated the number of times they had seen each ad and the sum score over all advertisements was used to represent inter-individual differences in the amount of advertising exposure.

**Primary and secondary outcome measures:** Established smoking, defined as smoked >100 cigarettes during the observational period, and daily smoking at follow-up. Secondary outcome measures were any smoking and smoking in the last 30 days.

**Results:** During the observation period 5% of the never smokers at baseline smoked more than 100 cigarettes and 4.4% were classified as daily smokers. After controlling for age, gender, socio-economic status, school performance, television screen time, personality characteristics, and smoking status of peers and parents, each additional 10 tobacco advertising contacts increased the adjusted relative risk for established smoking by 38% (95% confidence interval: 16% - 63%;  $p < 0.001$ ) and for daily smoking by 30% (95% confidence interval: 3% - 64%;  $p < 0.05$ ). No significant association was found for non-tobacco advertising contact.

**Conclusions:** The study confirms a content-specific association between tobacco advertising and smoking behaviour and underlines that tobacco advertising exposure is not

1  
2  
3 simply a marker for adolescents that are generally more receptive or attentive towards  
4  
5 marketing.  
6  
7  
8  
9

## 10 11 **ARTICLE SUMMARY**

### 12 13 **Article focus**

- 14  
15 - High exposure to tobacco advertising might just be an indicator of high advertising  
16 exposure in general.
- 17  
18 - In this study we compare the potential of tobacco advertising vs. non-tobacco  
19 advertising exposure in predicting established and daily smoking of formerly never-  
20 smoking German adolescents.  
21  
22  
23  
24  
25  
26  
27  
28  
29

### 30 31 **Key messages**

- 32  
33 - Exposure to tobacco advertisements predicted established smoking and daily  
34 smoking, exposure to non-tobacco advertising did not.
- 35  
36 - The study also shows that advertising allowed under partial bans still reaches  
37 adolescents.  
38  
39  
40  
41  
42  
43

### 44 45 **Strengths and limitations of this study**

- 46  
47 - One of few studies that tests the specificity of the association between tobacco  
48 advertising and smoking.
- 49  
50 - Long follow-up period with smoking outcomes that are strongly predictive of  
51 becoming an addicted smoker.
- 52  
53 - A high drop-out rate and attrition bias are limiting factors of this study.  
54  
55  
56  
57  
58  
59  
60



## INTRODUCTION

Tobacco companies were among the first companies to use integrated marketing strategies, and their products have long been among the most heavily marketed products in the United States and worldwide.<sup>1</sup> The tobacco industry still denies that their marketing is targeted at young people. According to the industry the purpose of tobacco advertising is to maintain and increase market shares of adult consumers.<sup>2</sup> In contrast, empirical research indicates that adolescents are aware of, recognize, and are influenced by tobacco marketing strategies. The U.S. Surgeon General's 2012 comprehensive review of the tobacco marketing literature concluded that advertising and promotional activities by tobacco companies are key risk factors for the uptake to smoking in adolescents.<sup>3</sup>

A 2011 Cochrane review identified 19 longitudinal studies that followed up a total of over 29,000 subjects, who were adolescents aged 18 or younger, and were not regular smokers at baseline. In 18 of the 19 studies the nonsmoking adolescents who were more aware of tobacco advertising or receptive to it, were more likely to experiment with cigarettes or become smokers at follow up.<sup>4</sup>

Based on these research results, article 13 of the World Health Organization's (WHO) Framework Convention on Tobacco Control stipulates a comprehensive ban on tobacco advertising, promotion, and sponsorship.<sup>5</sup> A number of countries all over the world follow these recommendations, and have banned tobacco advertisements. However, other countries, such as the United States and Germany, have implemented considerably weaker tobacco marketing policies.<sup>6</sup> Germany has banned tobacco advertisements in television, radio, newspapers, and magazines, but there are still opportunities for the industry to promote their products: Tobacco marketing is allowed at point of sale, on billboards, and in cinemas before movies that show after 6:00 pm. Brand extension, i.e. the use of tobacco brand names for other products, is also allowed.

From a scientific point of view, the best way to study the effects of tobacco marketing would be a randomized controlled trial. But this kind of study design would be both unethical and

1  
2  
3 impractical. Since experimental studies cannot be conducted, we have to rely on  
4  
5 observational studies. Sir Austin Bradford Hill identified several criteria for evaluating  
6  
7 causality in epidemiological studies.<sup>7</sup> According to these criteria the risk factor (e.g. tobacco  
8  
9 marketing) must clearly precede the hypothesized effect (e.g. smoking uptake in young  
10  
11 people). In addition, the association should be strong, consistent, expected from theory, and  
12  
13 specific.

14  
15 The Cochrane review on the effects of tobacco advertising on young people<sup>4</sup> listed our  
16  
17 previous study<sup>8,9</sup> as the only one that tested the specificity of tobacco advertising compared  
18  
19 to advertisements of other consumer goods. Limitations of this study included (a) the short  
20  
21 nine months follow-up period, and (b) the outcome measure which defined smoking initiation  
22  
23 during the observational period as any smoking including a few puffs. Clearly, not all  
24  
25 adolescents who try smoking will go on to become addicted smokers. With the current study  
26  
27 we present findings from the same cohort, only for a much longer follow-up period (30  
28  
29 months). The longer follow-up period enables us to study established and daily smoking as  
30  
31 outcomes in young people, outcomes that are more strongly predictive of becoming an  
32  
33 addicted smoker.<sup>10</sup>  
34  
35  
36  
37  
38  
39  
40  
41  
42  
43  
44  
45  
46  
47  
48  
49  
50  
51  
52  
53  
54  
55  
56  
57  
58  
59  
60

## METHODS

### Study sample

In May 2008 we invited 120 randomly selected schools from three states of Germany (Brandenburg, Hamburg, and Schleswig-Holstein) to participate in a school-based survey. The German school system has different types of schools (*Grundschule, Hauptschule, Realschule, Oberschule, Gemeinschaftsschule, Gymnasium*) that mainly differ with regard to the academic skills of their students and graduation level. The selection was stratified by state and type of school, assuring a balanced representation of all school types of the respective states. Twenty-nine schools with 176 classes and 4195 sixth to eighth grade students agreed to participate after a four week recruitment interval. In September and October 2008 we surveyed a total of 174 classes with 3415 students (81.4% of the sampled students). Reasons for exclusion were either absence (2 classes, 134 students) or missing parental consent (646 students). From the 3415 students surveyed at baseline, 2346 were classified as never smokers. Of these, 1320 (56.3%) could be reached again at the follow-up assessment in May/June 2011. Reasons for study drop-out were loss of primary schools that end after sixth grade (7 schools, 14 classes, 194 students), refusal to participate at the follow-up assessment (1 school, 8 classes, 59 students) or class absence (24 classes, 291 students). Other reasons were unexplained absence on the day of data assessment or unmatchable student codes (482 students). The number of analyzed never smokers per school ranged from 3 to 232, class-sizes ranged from 1 to 26.

### Survey implementation

Data were collected through self-completed anonymous questionnaires during one school hour (45 min. period), administered by trained research staff. Only students with written parental consent were qualified for participation, parent consent forms were disseminated by class teachers three weeks prior to the baseline assessment. Students did not receive incentives for participation and irrespective of parental consent all students were free to

1  
2  
3 refuse participation (none refused). Class teachers assigned tasks for students that did not  
4 participate. After completion of the survey, questionnaires were placed in an envelope and  
5 sealed in front of the class. Students were assured that their individual information would not  
6 be seen by parents or teachers. To permit a linking of the baseline and follow-up  
7 questionnaires, students generated an anonymous seven-digit individual code, a procedure  
8 that had been tested in previous studies, slightly modified for this study.<sup>11</sup> Implementation  
9 was approved by all Ministries of Cultural Affairs of the three involved states, and ethical  
10 approval was obtained from the Ethical Committee of the Medical Faculty of the University of  
11 Kiel (Ref.: D 417/08).  
12  
13  
14  
15  
16  
17  
18  
19  
20  
21  
22  
23

## 24 **Measures**

### 25 *Advertising exposure*

26  
27 Advertising exposure has been operationalized in numerous ways across studies.<sup>4</sup> It has  
28 been measured both in terms of the physical presence of advertisements in individuals'  
29 environments and in terms of the psychological processes underlying individuals' memories  
30 for these advertisements.<sup>12</sup> In the present study we approximated the individual advertising  
31 contact frequency by providing masked colored images of billboard ads for cigarettes and  
32 fixed-images of TV commercials for non-tobacco ads with all brand-identifying content  
33 digitally removed, asking the students to rate how often they have ever seen each ad extract  
34 (on a 4-point scale with scale points 0="Never," 1="1 to 4 times," 2="5 to 10 times" and  
35 3="More than 10 times"). The answers were post-coded as 0=0, 1=2.5, 2=7.5, and 3=11 and  
36 summed up to create the tobacco and non-tobacco ad scales, respectively.  
37  
38  
39  
40  
41  
42  
43  
44  
45  
46  
47  
48  
49

50  
51 The images included six cigarette brands, and eight "control" ads for products that included  
52 sweets, clothes, mobile phones, and cars. The following cigarette brands were included in  
53 the survey (with ad theme or cue in parentheses): (1) Marlboro (cowboy; horses); (2) F6  
54 (sunrise); (3) Gauloises (couple); (4) Pall Mall (Empire State Building); (5) L&M (couple); (6)  
55 Lucky Strike (cigarette packs). These six cigarette brands are among the eight most popular  
56  
57  
58  
59  
60

1  
2  
3 cigarette brands in Germany.<sup>13</sup> For other commercial products, the following ads were  
4 included in the survey (with product type and ad theme or cue in parentheses): (1) Jack  
5 Wolfskin (trekking-clothing; climber); (2) Volkswagen (car; the performer Seal); (3) Tic Tac  
6 (candy; elevator); (4) Dr. Best (tooth brush; tomato); (5) Kinder Pingui (chocolate bar;  
7 penguins); (6) T-Mobile (mobile phone; dog); (7) Spee (detergent; fox); (8) Toyota (car).  
8 Advertising selection was based on a pilot study on 28 tobacco and non-tobacco ads (110  
9 students aged 11 to 16 years, mean age 13.6 years), selecting the half of ads that revealed  
10 neither ceiling nor floor effects and had corrected item-test correlations above  $r_{it}=0.40$ .  
11  
12

13  
14  
15 We assessed ad exposure to non-tobacco products to control for the propensity to be  
16 receptive or attentive to advertising in general, which could confound the relation between  
17 tobacco-specific advertising exposure and smoking behavior.  
18  
19

### 20 21 22 *Smoking behavior*

23  
24  
25 We assessed lifetime smoking experience by asking "How many cigarettes have you smoked  
26 in your life?" (never smoked, just a few puffs, 1-19 cigarettes, 20-100 cigarettes, >100  
27 cigarettes).<sup>14</sup> Students that indicated any smoking at baseline, even just a few puffs, were  
28 excluded from the analysis. Having smoked more than 100 cigarettes at the follow-up  
29 assessment was defined as being an established smoker. Current smoking frequency was  
30 measured by asking, "How often do you smoke at present?" to which respondents could  
31 answer, "I don't smoke," "less than once a month," "at least once a month, but not weekly,"  
32 "at least once a week, but not daily," or "daily." For the present analysis, this variable was  
33 dichotomized into daily and non-daily smoking. To account for different smoking susceptibility  
34 in never-smokers at baseline we also assessed future use intentions ("Do you think you will  
35 ever smoke in the future?") and refusal intentions ("If one of your friends offered you a  
36 cigarette, would you take it?"), with response categories "Definitely not", "Probably not",  
37 "Probably yes", and "Definitely yes".<sup>15</sup>  
38  
39  
40  
41  
42  
43  
44  
45  
46  
47  
48  
49  
50  
51  
52  
53  
54  
55  
56  
57  
58  
59  
60

### *Covariates*

Covariate measures were derived from studies that focus on risk factors of adolescent tobacco use, to control for confounding variables that would be theoretically related to ad exposure and the smoking measures.<sup>16-18</sup>

Sociodemographics: age, gender, study region, and socioeconomic status (SES); SES of the students was approximated with a combination of student and class teacher ratings:

Students answered three items of the PISA cultural and social capital assessment,<sup>19</sup> asking for the number of books in the household (5-point scale from 0 = "None" to 4 = "More than 100") and parenting characteristics ("My parents always know where I am" and "My parents know other parents from my school"), class teachers filled out an 11-item school evaluation sheet related to SES of their students (examples: "Most students of the school live in families with financial problems", "Most students of the school come from underprivileged families", "Our school has a good reputation", scale range from 0 = "Not true at all" to 3 = "Totally true", Cronbach's alpha = 0.85); student and teacher ratings positively correlated  $r = 0.57$ , alpha = 0.72.

Personal characteristics: self-reported school performance ("How would you describe your grades last year?", scale points "excellent", "good", "average", "below average"); average TV screen time ("How many hours do you usually watch TV in your leisure time?", scale points: "none", "about half an hour", "about an hour", "about two hours", "about three hours", "about four hours", "more than four hours a day"); rebelliousness and sensation-seeking, assessed with four items combined into a single index, with higher scores indicating greater propensity for rebelliousness and sensation seeking<sup>20</sup> ("I get in trouble in school"; "I do things my parents wouldn't want me to do"; "I like scary things"; "I like to do dangerous things", scale points 0 = "not at all like me", 1 = "a little like me", 2 = "pretty much like me", and 3 = "exactly like me", Cronbach's alpha = 0.76).

1  
2  
3 Social environment: parent smoking (0 = “No”, 1 = “Yes, 2) and peer smoking (0 = “None”, 1  
4 = “Some, 2 = “Most”, 3 = “All”). As mentioned above, we also controlled for the adolescent’s  
5 ability to recall advertising in general with the non-tobacco ad scale.  
6  
7

### 8 9 **Statistical analysis**

10 All data analyses were conducted with Stata version 12.0 (Stata Corp, College Station, TX).

11  
12 Chi-squared tests and T-tests were performed to check whether subjects included in the  
13 analysis differed systematically from those not reached at the follow-up assessment.  
14

15 Bivariate associations between the study variables were analyzed using Spearman rank  
16 correlations. The multivariate associations between amount of advertising exposure and  
17 smoking initiation were analyzed with Poisson regressions. Poisson regression allows for the  
18 presentation of adjusted Incidence Rate Ratios (IRRs) and 95% confidence intervals (CIs) for  
19 the relationship between exposure to advertising and smoking at follow-up, having the  
20 advantage of not being influenced by the prevalence of the exposure. IRRs were calculated  
21 for every 10 advertising contacts, indicating the relative increase in smoking incidence  
22 (established smoking and daily smoking) for each additional 10 contacts. The dichotomized  
23 outcome variables were regressed on advertising exposure after inclusion of all covariates  
24 and with clustered robust standard errors to account for intra-class correlations within  
25 schools. In a subsequent analysis we repeated the Poisson regressions with advertising  
26 contact frequency being parsed into tertiles to account for the skewed distribution of tobacco  
27 advertising contact and to replicate the approach used in our previous analysis.<sup>9</sup> Missing  
28 data were handled by listwise deletion.  
29  
30  
31  
32  
33  
34  
35  
36  
37  
38  
39  
40  
41  
42  
43  
44  
45  
46  
47  
48  
49

## 50 **RESULTS**

### 51 52 **Descriptive statistics at baseline and attrition analysis**

53 Table 1 gives descriptive statistics for all interviewed never smokers at baseline, for those  
54 lost to follow-up, and the final analyzed sample, allowing comparisons of differences due to  
55  
56  
57  
58  
59  
60

attrition. Never smokers lost to follow-up were significantly younger of age, more often male, had lower scores on the SES scale, rated their school performance more poorly, had higher scores in sensation seeking/rebelliousness and more often reported at least one parent who smoked. No differences were found with regard to tobacco or non-tobacco advertising contact.

**Table 1.** Descriptive sample statistics at baseline and attrition analysis.

|                                            | Baseline never<br>smokers<br>(n=2346)<br>% | Lost to<br>follow-up<br>(n=1026)<br>% | Analyzed<br>Sample<br>(n=1320)<br>% | p     |
|--------------------------------------------|--------------------------------------------|---------------------------------------|-------------------------------------|-------|
| <b>Sociodemographics</b>                   |                                            |                                       |                                     |       |
| Age at baseline, mean (SD)                 | 12.24 (1.01)                               | 12.16 (1.09)                          | 12.30 (0.93)                        | .001  |
| Gender: Female                             | 54.9                                       | 51.9                                  | 57.3                                | .008  |
| SES: Below Median                          | 51.1                                       | 60.6                                  | 43.8                                | <.001 |
| <b>State</b>                               |                                            |                                       |                                     |       |
| Schleswig-Holstein                         | 41.6                                       | 39.8                                  | 43.0                                | .279  |
| Hamburg                                    | 28.4                                       | 29.1                                  | 27.8                                |       |
| Brandenburg                                | 30.0                                       | 31.1                                  | 29.2                                |       |
| <b>Personal characteristics</b>            |                                            |                                       |                                     |       |
| <b>School performance</b>                  |                                            |                                       |                                     |       |
| Below average                              | 2.5                                        | 3.7                                   | 1.5                                 | <.001 |
| Average                                    | 33.7                                       | 37.8                                  | 30.6                                |       |
| Good                                       | 49.9                                       | 44.9                                  | 53.9                                |       |
| Excellent                                  | 13.9                                       | 13.6                                  | 14.0                                |       |
| <b>TV screen time</b>                      |                                            |                                       |                                     |       |
| ≤ 30 min                                   | 16.8                                       | 15.5                                  | 17.8                                | .051  |
| 1-2 h                                      | 59.5                                       | 58.8                                  | 60.1                                |       |
| 3-4 h                                      | 19.0                                       | 19.8                                  | 18.3                                |       |
| > 4 h                                      | 4.7                                        | 5.9                                   | 3.8                                 |       |
| Sensation seeking and                      | 0.53 (0.50)                                | 0.56 (0.51)                           | 0.50 (0.49)                         | .010  |
| <b>Social environment</b>                  |                                            |                                       |                                     |       |
| Peer smoking: None                         | 71.7                                       | 71.5                                  | 71.9                                | .858  |
| Parent smoking: No                         | 53.3                                       | 49.3                                  | 56.4                                | .001  |
| <b>Advertising exposure</b>                |                                            |                                       |                                     |       |
| <b>Tobacco advertising, range 0-55</b>     |                                            |                                       |                                     |       |
| Low (< 1)                                  | 35.3                                       | 35.3                                  | 35.4                                | .600  |
| Medium (1 - 10)                            | 38.7                                       | 39.7                                  | 38.0                                |       |
| High (> 10)                                | 26.0                                       | 25.0                                  | 26.6                                |       |
| <b>Non-tobacco advertising, range 0-88</b> |                                            |                                       |                                     |       |
| Low (< 35)                                 | 39.8                                       | 40.8                                  | 39.0                                | .469  |
| Medium (35 – 54)                           | 32.1                                       | 32.4                                  | 32.0                                |       |
| High (> 54)                                | 28.1                                       | 26.8                                  | 29.0                                |       |



### Smoking initiation during the observational period

Thirty months after the baseline assessment 436 never smokers reported trying cigarette smoking including a few puffs (33% incidence rate), 138 reported smoking in the past 30 days (10.5% incidence rate), Sixty-six had smoked more than 100 cigarettes and were classified as established smokers (incidence rate 5%), and 58 reported daily smoking (incidence rate 4.4%). Daily smoking incidence was not significantly related to age ( $p=0.526$ ) or sex ( $p=0.153$ ), with 33% of the daily smokers at follow-up being 14 years of age or younger and 24% being 16 or older.

### Exposure to advertisements at baseline

**Table 2.** Contact frequency for tobacco and non-tobacco advertisements (n = 1320 never smokers at baseline)

|                                       | Seen at least<br>once<br>% | Seen more than<br>10 times<br>% |
|---------------------------------------|----------------------------|---------------------------------|
| <b>Tobacco ads (product type)</b>     |                            |                                 |
| Lucky Strike (cigarettes)             | 49                         | 13                              |
| Marlboro (cigarettes)                 | 28                         | 6                               |
| Pall Mall (cigarettes)                | 24                         | 6                               |
| Gauloises (cigarettes)                | 19                         | 2                               |
| L&M (cigarettes)                      | 18                         | 4                               |
| F6 (cigarettes)                       | 12                         | 1                               |
| <b>Non-tobacco ads (product type)</b> |                            |                                 |
| Kinder Pingui (sweet)                 | 96                         | 71                              |
| Tic Tac (candy)                       | 87                         | 44                              |
| Dr. Best (tooth brush)                | 83                         | 36                              |
| T-Mobile (mobile phone)               | 85                         | 35                              |
| Spee (detergent)                      | 76                         | 24                              |
| Volkswagen (car)                      | 50                         | 14                              |
| Toyota (car)                          | 54                         | 10                              |
| Jack Wolfskin (trekking-clothing)     | 45                         | 9                               |

Table 2 gives contact frequencies (how often the students had seen the ad) for all advertised products at baseline. The cigarette ad with the highest contact frequency was Lucky Strike, for which about half of the sample reported at least one contact. The lowest tobacco ad

1  
2  
3 contact frequency rate was found for F6, a regional German cigarette brand sold mainly in  
4 eastern Germany. Ad contact frequency for non-tobacco products was generally much higher  
5 than for tobacco products. For example, almost all students (96%) reported having seen the  
6 ad for Kinder Pingui, a chocolate bar. The range of the sum of contacts over all depicted  
7 advertisements was 0 to 55 (mean=7.9) for the tobacco ads, and 0 to 88 (mean=42.2) for the  
8 non-tobacco ads, also reflecting the lower number of tobacco ads (6 vs. 8).  
9  
10  
11  
12  
13

### 14 15 16 **Zero order associations**

17  
18  
19 Table 3 shows pairwise Spearman rank correlations between the study variables,  
20 demonstrating significant crude associations between the assessed covariates and smoking  
21 behavior as well as between covariates and advertising contact, justifying their inclusion in  
22 the multivariate analyses. The highest correlations with all smoking outcomes was found for  
23 peer smoking, followed by tobacco advertising contact. There were some differences in the  
24 correlational pattern between tobacco and non-tobacco advertising contact. Compared to the  
25 amount of contact with tobacco ads, non-tobacco advertising exposure was stronger related  
26 to age and showed no association with gender, and also had a stronger correlation with SES,  
27 TV screen time, and parental smoking. The zero-order correlation between tobacco and non-  
28 tobacco advertising contact indicated a proportion of about 20% shared variance.  
29  
30  
31  
32  
33  
34  
35  
36  
37  
38  
39

### 40 41 **Association between advertising contact and smoking initiation**

42  
43  
44 Figures 1a and 1b show the adjusted predictions of established smoking and daily smoking  
45 based on the amount of tobacco and non-tobacco advertising contact. The curves illustrate  
46 an increasing risk for the two smoking outcomes dependent on the amount of tobacco ad  
47 contact, but not for non-tobacco advertising contact.  
48  
49  
50  
51  
52  
53  
54

55  
56  
57  
58  
59  
60  
Insert Figures 1a and 1b about here

**Table 3.** Zero-order correlation matrix for all study variables.

|                                        | 1.             | 2.             | 3.              | 4.             | 5.             | 6.             | 7.             | 8.             | 9.             | 10.            | 11.            | 12.            | 13.            | 14.            |
|----------------------------------------|----------------|----------------|-----------------|----------------|----------------|----------------|----------------|----------------|----------------|----------------|----------------|----------------|----------------|----------------|
| 1. Age                                 | 1.00           |                |                 |                |                |                |                |                |                |                |                |                |                |                |
| 2. Gender<br>(0=female, 1=male)        | 0.02           | 1.00           |                 |                |                |                |                |                |                |                |                |                |                |                |
| 3. SES                                 | <b>-0.07*</b>  | 0.02           | 1.00            |                |                |                |                |                |                |                |                |                |                |                |
| 4. Region<br>(0=west, 1=east)          | <b>0.25***</b> | -0.01          | <b>-0.10*</b>   | 1.00           |                |                |                |                |                |                |                |                |                |                |
| 5. School<br>performance               | <b>0.11***</b> | 0.03           | <b>-0.16***</b> | -0.05          | 1.00           |                |                |                |                |                |                |                |                |                |
| 6. TV screen time                      | <b>0.17***</b> | <b>0.07**</b>  | <b>-0.30***</b> | <b>0.25***</b> | <b>0.15***</b> | 1.00           |                |                |                |                |                |                |                |                |
| 7. Sensation seeking                   | <b>0.09***</b> | <b>0.24***</b> | -0.03           | 0.01           | <b>0.16***</b> | <b>0.18***</b> | 1.00           |                |                |                |                |                |                |                |
| 8. Peer smoking                        | <b>0.28***</b> | 0.02           | <b>-0.22***</b> | <b>0.28***</b> | <b>0.15***</b> | <b>0.24***</b> | <b>0.24***</b> | 1.00           |                |                |                |                |                |                |
| 9. Parent smoking                      | 0.04           | -0.02          | <b>-0.26***</b> | <b>0.09***</b> | <b>0.11**</b>  | <b>0.22***</b> | <b>0.08**</b>  | <b>0.17***</b> | 1.00           |                |                |                |                |                |
| 10. Tobacco ad<br>exposure             | <b>0.14***</b> | <b>0.13***</b> | 0.02            | <b>-0.06*</b>  | 0.05           | <b>0.11**</b>  | <b>0.24***</b> | <b>0.13***</b> | <b>0.08**</b>  | 1.00           |                |                |                |                |
| 11. Non-tobacco ad<br>exposure         | <b>0.20***</b> | 0.05           | <b>-0.08**</b>  | <b>0.11**</b>  | <b>0.06*</b>   | <b>0.36***</b> | <b>0.21***</b> | <b>0.18***</b> | <b>0.18***</b> | <b>0.44***</b> | 1.00           |                |                |                |
| 12. Ever smoking                       | <b>0.15***</b> | 0.01           | <b>-0.17***</b> | <b>0.14***</b> | <b>0.09**</b>  | <b>0.14***</b> | <b>0.18***</b> | <b>0.24***</b> | <b>0.13***</b> | <b>0.19***</b> | <b>0.15***</b> | 1.00           |                |                |
| 13. Past 30 days<br>smoking            | <b>0.09**</b>  | -0.02          | <b>-0.12**</b>  | <b>0.08**</b>  | <b>0.06*</b>   | <b>0.12**</b>  | <b>0.15***</b> | <b>0.21***</b> | <b>0.14***</b> | <b>0.17***</b> | <b>0.12***</b> | <b>0.61***</b> | 1.00           |                |
| 14. Established<br>smoking (>100 cig.) | <b>0.07*</b>   | <b>0.09**</b>  | <b>-0.07*</b>   | <b>0.08**</b>  | 0.05           | <b>0.10*</b>   | <b>0.12**</b>  | <b>0.16***</b> | <b>0.09***</b> | <b>0.13***</b> | <b>0.09**</b>  | <b>0.33***</b> | <b>0.51***</b> | 1.00           |
| 15. Daily smoking                      | 0.02           | 0.04           | <b>-0.14***</b> | <b>0.08**</b>  | <b>0.07*</b>   | <b>0.10*</b>   | <b>0.09**</b>  | <b>0.14***</b> | <b>0.13***</b> | <b>0.08**</b>  | 0.03           | <b>0.30***</b> | <b>0.49***</b> | <b>0.75***</b> |

Bold figures == significant associations

\*p<0.05; \*\*p<0.01; \*\*\*p<0.001

1  
2  
3 The Figures also report the adjusted incidence rate ratios associated with an increase in  
4 advertising exposure. There was an adjusted IRR for established smoking of 1.38 (95% CI  
5 1.16, 1.63;  $p < 0.001$ ) for each additional 10 tobacco ad contacts and 1.00 (95% CI 0.84, 1.19;  
6  
7  $p = 0.996$ ) for each additional 10 non-tobacco ad contacts. For daily smoking, the  
8  
9 corresponding IRRs were 1.30 (95% CI 1.03, 1.64;  $p = 0.029$ ) for 10 tobacco ad contacts and  
10  
11 0.92 (95% CI 0.79, 1.08;  $p = 0.296$ ) for 10 non-tobacco ad contacts, respectively.  
12  
13

14  
15 Due to the skewed distribution of tobacco ad contact frequency (more than half of the never-  
16 smoking students had fewer than 10 contacts), we repeated the analysis using contact  
17 frequency parsed into tertiles, representing relative low (0-2.5), medium (5-10), and high (11-  
18 55) advertising contact. For established smoking the adjusted IRRs were 1.52 for tobacco  
19 ads (95% CI 1.14, 2.03;  $p = 0.004$ ) and 1.05 for non-tobacco ads (95% CI 0.68, 1.62;  
20  
21  $p = 0.819$ ). Using daily smoking as outcome variable the IRRs were 1.43 (95% CI 1.08, 1.90;  
22  
23  $p = 0.012$ ) and 0.84 (95% CI 0.58, 1.22;  $p = 0.363$ ) for each additional tertile of tobacco and  
24  
25 non-tobacco advertising contact. These IRRs relate to 3.1%, 4.8%, and 7.3% established  
26  
27 smoking attributable incidence rate or 3.1%, 4.6%, and 6.4% daily smoking incidence for low,  
28  
29 medium, and high tobacco advertising contact, respectively, assuming the adjusted analysis  
30  
31 adequately controlled for third variable influence.  
32  
33  
34  
35  
36  
37  
38

39 To address the question if some never smokers had higher tobacco advertising contact  
40 because they were already more susceptible towards smoking at baseline, we conducted a  
41 sensitivity analysis with only never smokers with low susceptibility. These students reported  
42 at baseline that they will definitely never smoke in the future and would definitely not try  
43 cigarettes if a friend offered one ( $n = 803$ ). In this restricted sub-sample the adjusted IRR for  
44  
45 each additional 10 tobacco ad contacts was 1.37 for established smoking (95% CI 1.07,  
46  
47 1.76;  $p = 0.012$ ) and 1.33 for daily smoking (95% CI 1.02, 1.75;  $p = 0.038$ ). Again, no significant  
48  
49 associations were found for non-tobacco advertisings.  
50  
51  
52  
53  
54  
55  
56  
57  
58  
59  
60

## DISCUSSION

This longitudinal study is a further test of the relationship between tobacco advertising exposure and youth smoking behavior, confirming the specificity of the advertising-smoking link by comparing the effects of tobacco versus non-tobacco advertising. The study extends previous work by using two less prevalent outcome measures (established and daily smoking) and a longer follow-up period of 2.5 years, measures likely to indicate an addiction component to the smoking.<sup>21</sup> Compared to the results reported on smoking initiation in terms of ever smoking (even a few puffs),<sup>9</sup> the increase in the adjusted relative risk for daily smoking dependent on tobacco advertising exposure was even more pronounced. Specificity was shown by the finding that tobacco advertising at baseline predicted these outcomes independent of the amount of general advertising contact and after controlling for a number of well-known risk factors for smoking initiation. This result confirms the content-specific association between tobacco advertising and smoking behaviour and underlines that tobacco advertising exposure is not simply a marker for adolescents that are generally more receptive or attentive towards marketing. In addition, a sub-sample sensitivity analysis revealed that the association between tobacco advertising exposure and smoking uptake was also found in the group of unsusceptible never smokers. This is important as one could argue that never smokers with higher exposure were already more susceptible towards smoking at baseline and therefore more attentive towards the tobacco ads.

This longitudinal study also clearly points out the implications of partial tobacco advertising bans in countries like the United States and Germany. The one-third of adolescents in the highest tertile of advertising had rates of daily and established smoking that were double (3 percentage points higher) than adolescents in the first tertile. In reverse, assuming that the models were fully adjusted for other confounding influences, one might expect a significant further decrease in youth smoking uptake in these countries after a total elimination of tobacco advertising.

1  
2  
3 Some limitations of the study have to be considered. There was a severe loss of students  
4 during the 30 months interval (44%). To a large degree the drop-out was due to  
5 organizational issues (e.g., school and class changes) that are unlikely systematically related  
6 to advertising exposure or smoking behavior on the individual level. However, the lost  
7 students differed on a couple of dimensions from the retained students, i.e., age, gender,  
8 socio-economic status, school performance, sensation seeking, and parental smoking. With  
9 the exception of the lower age, the drop-out markers indicate that lower risk adolescents  
10 were more likely to be retained. This might have biased the results as the effect of one risk  
11 factor might not be independent of other risk factors. Generally, one would assume that the  
12 associations get more conservative if higher risk adolescents are excluded, because this  
13 group has a higher likelihood of starting to smoke. However, in the context of media effects  
14 on smoking initiation there is also evidence that lower risk adolescents have a higher  
15 responsiveness towards media effects<sup>22,23</sup>, indicating that the present results might not be  
16 generalised to the whole population of adolescents. Second, as with any observational study,  
17 the results may be biased by unmeasured confounding – that is, an unmeasured risk factor  
18 could alter the estimates reported for the association between tobacco advertising and  
19 smoking onset. Third, the memory-based measure of ad exposure could be biased by  
20 memory effects other than the ones we controlled for. The potential to remember ads (in  
21 terms of contact frequency) should, however, not be completely independent of actual  
22 exposure. Finally, because the implemented method did not use a representative sample of  
23 all broadcasted ads, it does not allow for an accurate estimation of the total amount of  
24 tobacco and non-tobacco advertising exposure or the advertising pressure of specific brands.  
25 This is amplified by the modification of the stimulus material which did not contain any brand  
26 information.

27  
28  
29  
30  
31  
32  
33  
34  
35  
36  
37  
38  
39  
40  
41  
42  
43  
44  
45  
46  
47  
48  
49  
50  
51  
52  
53 The finding that exposure to tobacco advertising predicts smoking in youth could have  
54 important public health implications. A total ban of tobacco advertising and promotion around  
55 the world is one key policy measure of the WHO Framework Convention on Tobacco Control  
56 (FCTC)<sup>24</sup>. Under Article 13.1 of the FCTC, 'Parties recognize that a comprehensive ban on  
57  
58  
59  
60

1  
2  
3 advertising, promotion and sponsorship would reduce the consumption of tobacco products'.  
4  
5 Data from this study support this measure, because only exposure to tobacco  
6  
7 advertisements predicted smoking initiation, which cannot be attributed to a general  
8  
9 receptiveness to marketing and because it shows that advertising allowed under partial bans  
10  
11 is still reaching adolescents.  
12  
13  
14  
15  
16  
17  
18  
19  
20  
21  
22  
23  
24  
25  
26  
27  
28  
29  
30  
31  
32  
33  
34  
35  
36  
37  
38  
39  
40  
41  
42  
43  
44  
45  
46  
47  
48  
49  
50  
51  
52  
53  
54  
55  
56  
57  
58  
59  
60

For peer review only

**STATEMENTS****Licence**

The Corresponding Author has the right to grant on behalf of all authors and does grant on behalf of all authors, an exclusive licence (or non-exclusive for government employees) on a worldwide basis to the BMJ Group and co-owners or contracting owning societies (where published by the BMJ Group on their behalf), and its Licensees to permit this article (if accepted) to be published in BMJ and any other BMJ Group products and to exploit all subsidiary rights, as set out in our licence.

**Funding**

This study was financed by DAK-Gesundheit, a German health insurance firm.

**Acknowledgement**

We like to thank Mandy Gauditz, Lars Grabbe, Sven Heid, Frank Kirschneck, Carmen and Sarah Koynowski, Detlef Kraut, Corinna Liefeld, Karin Maruska, Danuta Meinhardt, Marc Räder, Jan Sängler, and Gesa Sander for assessing the data.

**Competing interests:**

None.

**Contributors:**

Conception and design of the study: All authors

Analysis and interpretation of data: MM, RH



1  
2  
3 Collection and assembly of data: MM, BI  
4

5 Drafting of the article: MM, JS, RH  
6

7 Critical revision of the article for important intellectual content: All authors  
8

9 Final approval of the article: All authors  
10

11  
12  
13  
14 All authors have full access to all of the data (including statistical reports and tables) in the  
15 study and can take responsibility for the integrity of the data and the accuracy of the data  
16 analysis.  
17  
18  
19

20  
21  
22  
23 Study implementation was approved by the Ethical Committee of the Medical Faculty of the  
24 University of Kiel (Ref.: D 417/08).  
25  
26  
27

28  
29  
30 **Data sharing:** No additional data available.  
31  
32  
33  
34  
35  
36  
37  
38  
39  
40  
41  
42  
43  
44  
45  
46  
47  
48  
49  
50  
51  
52  
53  
54  
55  
56  
57  
58  
59  
60

## References

- (1) Brandt AM. The cigarette century: The rise, fall and deadly persistence of the product that defined America. New York, NY: Basic Books; 2007.
- (2) Pollay RW. Targeting youth and concerned smokers: evidence from Canadian tobacco industry documents. *Tob Control* 2000; 9(2):136-147.
- (3) U.S. Department of Health and Human Services. Preventing tobacco use among youth and young adults: A report of the Surgeon General. Atlanta, GA: U.S. Department of Health and Human Services, Centers for Disease Control and Prevention, National Center for Chronic Disease Prevention and Health Promotion, Office on Smoking and Health; 2012.
- (4) Lovato C, Watts A, Stead LF. Impact of tobacco advertising and promotion on increasing adolescent smoking behaviours. *Cochrane Database Syst Rev* 2011;(10):CD003439.
- (5) Henriksen L. Comprehensive tobacco marketing restrictions: promotion, packaging, price and place. *Tob Control* 2012; 21(2):147-153.
- (6) Strasburger VC. Policy statement--children, adolescents, substance abuse, and the media. *Pediatrics* 2010; 126(4):791-799.
- (7) Hill AB. The environment and disease: association or causation? *Proc R Soc Med* 1965; 58:295-300.
- (8) Hanewinkel R, Isensee B, Sargent JD, et al. Cigarette advertising and adolescent smoking. *Am J Prev Med* 2010; 38(4):359-366.
- (9) Hanewinkel R, Isensee B, Sargent JD, et al. Cigarette advertising and teen smoking initiation. *Pediatrics* 2011; 127(2):e271-e278.
- (10) Kenford SL, Wetter DW, Welsch SK, Smith SS, Fiore MC, Baker TB. Progression of college-age cigarette samplers: what influences outcome. *Addict Behav* 2005; 30(2):285-294.
- (11) Galanti MR, Siliquini R, Cuomo L, et al. Testing anonymous link procedures for follow-up of adolescents in a school-based trial: The EU-DAP pilot study. *Prev Med* 2007; 44(2):174-177.
- (12) Klitzner M, Gruenewald PJ, Bamberger E. Cigarette advertising and adolescent experimentation with smoking. *Br J Addict* 1991; 86(3):287-298.
- (13) Deutsches Krebsforschungszentrum. The Tobacco Atlas Germany 2009. Heidelberg: Deutsches Krebsforschungszentrum (in German); 2009.
- (14) Bondy SJ, Victor JC, Diemert LM. Origin and use of the 100 cigarette criterion in tobacco surveys. *Tob Control* 2009; 18(4):317-323.

- 1  
2  
3 (15) Pierce JP, Choi WS, Gilpin EA, et al. Validation of susceptibility as a predictor of  
4 which adolescents take up smoking in the United States. *Health Psychol* 1996;  
5 15:355-361.  
6  
7 (16) Gibbons FX, Gerrard M. Predicting young adults' health risk behavior. *J Pers Soc*  
8 *Psychol* 1995; 69(3):505-517.  
9  
10 (17) Hawkins JD, Catalano RF, Miller JY. Risk and protective factors for alcohol and other  
11 drug problems in adolescence and early adulthood: implications for substance abuse  
12 prevention. *Psychol Bull* 1992; 112(1):64-105.  
13  
14 (18) Petraitis J, Flay BR, Miller TQ. Reviewing theories of adolescent substance use:  
15 organizing pieces in the puzzle. *Psychol Bull* 1995; 117(1):67-86.  
16  
17 (19) Kunter M, Schümer G, Artelt C, et al. Pisa 2000: Dokumentation der  
18 Erhebungsinstrumente (Pisa 2000: Documentation of measures). Berlin: Max-Planck-  
19 Institut für Bildungsforschung (in German); 2002.  
20  
21 (20) Russo MF, Stokes GS, Lahey BB, et al. A sensation seeking scale for children:  
22 Further refinement and psychometric development. *J Psychopathol Behav Assess*  
23 1993; 15:69-85.  
24  
25 (21) Sargent JD, Mott LA, Stevens M. Predictors of smoking cessation in adolescents.  
26 *Arch Pediatr Adolesc Med* 1998; 152(4):388-393.  
27  
28 (22) Dalton MA, Sargent JD, Beach ML, et al. Effect of viewing smoking in movies on  
29 adolescent smoking initiation: a cohort study. *Lancet* 2003; 362(9380):281-285.  
30  
31 (23) Hanewinkel R, Sargent JD. Exposure to smoking in internationally distributed  
32 American movies and youth smoking in Germany: a cross-cultural cohort study.  
33 *Pediatrics* 2008; 121(1):e108-e117.  
34  
35 (24) Shibuya K, Ciecierski C, Guindon E, et al. WHO Framework Convention on Tobacco  
36 Control: development of an evidence based global public health treaty. *BMJ* 2003;  
37 327(7407):154-157.  
38  
39  
40  
41  
42  
43  
44  
45  
46  
47  
48  
49  
50  
51  
52  
53  
54  
55  
56  
57  
58  
59  
60

1  
2  
3  
4  
5  
6  
7  
8  
9  
10  
11  
12  
13  
14  
15  
16  
17  
18  
19  
20  
21  
22  
23  
24  
25  
26  
27  
28  
29  
30  
31  
32  
33  
34  
35  
36  
37  
38  
39  
40  
41  
42  
43  
44  
45  
46  
47  
48  
49  
50  
51  
52  
53  
54  
55  
56  
57  
58  
59  
60

**Figure legend**

**Figures 1a and 1b**

----- Tobacco advertising      — Non-tobacco advertising

IRR = Incidence Rate Ratio for 10 additional advertising contacts  
Figures in brackets = 95% Confidence Interval  
n.s. = not significant; \*= $p < .05$ ; \*\*\*= $p < .001$

For peer review only

1  
2  
3 **From never to daily smoking in 30 months:**

4  
5 **The predictive value of tobacco and non-tobacco advertising exposure**

6  
7  
8  
9 Matthis Morgenstern, PhD <sup>1,2</sup>

10  
11 James D. Sargent, MD <sup>3</sup>

12  
13 Barbara Isensee, PhD <sup>1</sup>

14  
15 Reiner Hanewinkel, PhD <sup>1,2</sup>

16  
17  
18  
19 <sup>1</sup> Institute for Therapy and Health Research (IFT-Nord)  
20 Harmsstrasse 2  
21 24114 Kiel  
22 Germany

23  
24  
25 <sup>2</sup> Institute for Medical Psychology and Medical Sociology, University Medical Center  
26 Schleswig-Holstein, Campus Kiel  
27 Diesterwegstrasse 10-12  
28 24113 Kiel  
29 Germany

30  
31 <sup>3</sup> Geisel School of Medicine at Dartmouth  
32 Cancer Control Research Program  
33 Norris Cotton Cancer Center  
34 Lebanon, NH  
35 USA

36  
37  
38 Corresponding author:  
39 M. Morgenstern  
40 Institute for Therapy and Health Research (IFT-Nord)  
41 Harmsstrasse 2  
42 24114 Kiel  
43 Germany  
44 Phone: +49 431 570 29 35  
45 Fax: +49 431 570 29 29  
46 Mail: morgenstern@ift-nord.de

47  
48  
49 **Keywords:** adolescence • cigarettes • marketing • advertising • longitudinal • Germany

50  
51  
52 Word count (text only): 3647

53  
54  
55 Number of tables: 3

56  
57  
58 Number of figures: 2

**ABSTRACT**

**Objective:** To test the specificity of the association between tobacco advertising and youth smoking initiation.

**Design:** Longitudinal survey with a 30-months interval.

**Setting:** Twenty-one public schools in 3 German states.

**Participants:** A total of 1320 sixth- to eighth-grade students who were never-smokers at baseline (age range at baseline, 10-15 years; mean, 12.3 years).

**Exposures:** Exposure to tobacco and non-tobacco advertisements was measured at baseline with images of 6 tobacco and 8 non-tobacco advertisements; students indicated the number of times they had seen each ad and the sum score over all advertisements was used to represent inter-individual differences in the amount of advertising exposure.

**Primary and secondary outcome measures:** Established smoking, defined as smoked >100 cigarettes during the observational period, and daily smoking at follow-up. Secondary outcome measures were any smoking and smoking in the last 30 days.

**Results:** During the observation period 5% of the never smokers at baseline smoked more than 100 cigarettes and 4.4% were classified as daily smokers. After controlling for age, gender, socio-economic status, school performance, television screen time, personality characteristics, and smoking status of peers and parents, each additional 10 tobacco advertising contacts increased the adjusted relative risk for established smoking by 38% (95% confidence interval: 16% - 63%;  $p < 0.001$ ) and for daily smoking by 30% (95% confidence interval: 3% - 64%;  $p < 0.05$ ). No significant association was found for non-tobacco advertising contact.

**Conclusions:** The study confirms a content-specific association between tobacco advertising and smoking behaviour and underlines that tobacco advertising exposure is not

1  
2  
3 simply a marker for adolescents that are generally more receptive or attentive towards  
4  
5 marketing.  
6  
7  
8  
9

## 10 11 **ARTICLE SUMMARY**

### 12 13 **Article focus**

- 14  
15 - High exposure to tobacco advertising might just be an indicator of high advertising  
16 exposure in general.
- 17  
18 - In this study we compare the potential of tobacco advertising vs. non-tobacco  
19 advertising exposure in predicting established and daily smoking of formerly never-  
20 smoking German adolescents.  
21  
22  
23  
24  
25  
26  
27  
28  
29

### 30 31 **Key messages**

- 32  
33 - Exposure to tobacco advertisements predicted established smoking and daily  
34 smoking, exposure to non-tobacco advertising did not.
- 35  
36 - The study also shows that advertising allowed under partial bans still reaches  
37 adolescents.  
38  
39  
40  
41  
42  
43

### 44 45 **Strengths and limitations of this study**

- 46  
47 - One of few studies that tests the specificity of the association between tobacco  
48 advertising and smoking.
- 49  
50 - Long follow-up period with smoking outcomes that are strongly predictive of  
51 becoming an addicted smoker.
- 52  
53 - A high drop-out rate and attrition bias are limiting factors of this study.  
54  
55  
56  
57  
58  
59  
60

## INTRODUCTION

Tobacco companies were among the first companies to use integrated marketing strategies, and their products have long been among the most heavily marketed products in the United States and worldwide.<sup>1</sup> The tobacco industry still denies that their marketing is targeted at young people. According to the industry the purpose of tobacco advertising is to maintain and increase market shares of adult consumers.<sup>2</sup> In contrast, empirical research indicates that adolescents are aware of, recognize, and are influenced by tobacco marketing strategies. The U.S. Surgeon General's 2012 comprehensive review of the tobacco marketing literature concluded that advertising and promotional activities by tobacco companies are key risk factors for the uptake to smoking in adolescents.<sup>3</sup>

A 2011 Cochrane review identified 19 longitudinal studies that followed up a total of over 29,000 subjects, who were adolescents aged 18 or younger, and were not regular smokers at baseline. In 18 of the 19 studies the nonsmoking adolescents who were more aware of tobacco advertising or receptive to it, were more likely to experiment with cigarettes or become smokers at follow up.<sup>4</sup>

Based on these research results, article 13 of the World Health Organization's (WHO) Framework Convention on Tobacco Control stipulates a comprehensive ban on tobacco advertising, promotion, and sponsorship.<sup>5</sup> A number of countries all over the world follow these recommendations, and have banned tobacco advertisements. However, other countries, such as the United States and Germany, have implemented considerably weaker tobacco marketing policies.<sup>6</sup> Germany has banned tobacco advertisements in television, radio, newspapers, and magazines, but there are still opportunities for the industry to promote their products: Tobacco marketing is allowed at point of sale, on billboards, and in cinemas before movies that show after 6:00 pm. Brand extension, i.e. the use of tobacco brand names for other products, is also allowed.

From a scientific point of view, the best way to study the effects of tobacco marketing would be a randomized controlled trial. But this kind of study design would be both unethical and



1  
2  
3 impractical. Since experimental studies cannot be conducted, we have to rely on  
4  
5 observational studies. Sir Austin Bradford Hill identified several criteria for evaluating  
6  
7 causality in epidemiological studies.<sup>7</sup> According to these criteria the risk factor (e.g. tobacco  
8  
9 marketing) must clearly precede the hypothesized effect (e.g. smoking uptake in young  
10  
11 people). In addition, the association should be strong, consistent, expected from theory, and  
12  
13 specific.

14  
15 The Cochrane review on the effects of tobacco advertising on young people<sup>4</sup> listed our  
16  
17 previous study<sup>8,9</sup> as the only one that tested the specificity of tobacco advertising compared  
18  
19 to advertisements of other consumer goods. Limitations of this study included (a) the short  
20  
21 nine months follow-up period, and (b) the outcome measure which defined smoking initiation  
22  
23 during the observational period as any smoking including a few puffs. Clearly, not all  
24  
25 adolescents who try smoking will go on to become addicted smokers. With the current study  
26  
27 we present findings from the same cohort, only for a much longer follow-up period (30  
28  
29 months). The longer follow-up period enables us to study established and daily smoking as  
30  
31 outcomes in young people, outcomes that are more strongly predictive of becoming an  
32  
33 addicted smoker.<sup>10</sup>  
34  
35  
36  
37  
38  
39  
40  
41  
42  
43  
44  
45  
46  
47  
48  
49  
50  
51  
52  
53  
54  
55  
56  
57  
58  
59  
60

## METHODS

### Study sample

In May 2008 we invited 120 randomly selected schools from three states of Germany (Brandenburg, Hamburg, and Schleswig-Holstein) to participate in a school-based survey. The German school system has different types of schools (*Grundschule, Hauptschule, Realschule, Oberschule, Gemeinschaftsschule, Gymnasium*) that mainly differ with regard to the academic skills of their students and graduation level. The selection was stratified by state and type of school, assuring a balanced representation of all school types of the respective states. Twenty-nine schools with 176 classes and 4195 sixth to eighth grade students agreed to participate after a four week recruitment interval. In September and October 2008 we surveyed a total of 174 classes with 3415 students (81.4% of the sampled students). Reasons for exclusion were either absence (2 classes, 134 students) or missing parental consent (646 students). From the 3415 students surveyed at baseline, 2346 were classified as never smokers. Of these, 1320 (56.3%) could be reached again at the follow-up assessment in May/June 2011. Reasons for study drop-out were loss of primary schools that end after sixth grade (7 schools, 14 classes, 194 students), refusal to participate at the follow-up assessment (1 school, 8 classes, 59 students) or class absence (24 classes, 291 students). Other reasons were unexplained absence on the day of data assessment or unmatchable student codes (482 students). The number of analyzed never smokers per school ranged from 3 to 232, class-sizes ranged from 1 to 26.

### Survey implementation

Data were collected through self-completed anonymous questionnaires during one school hour (45 min. period), administered by trained research staff. Only students with written parental consent were qualified for participation, parent consent forms were disseminated by class teachers three weeks prior to the baseline assessment. Students did not receive incentives for participation and irrespective of parental consent all students were free to

1  
2  
3 refuse participation (none refused). Class teachers assigned tasks for students that did not  
4 participate. After completion of the survey, questionnaires were placed in an envelope and  
5 sealed in front of the class. Students were assured that their individual information would not  
6 be seen by parents or teachers. To permit a linking of the baseline and follow-up  
7 questionnaires, students generated an anonymous seven-digit individual code, a procedure  
8 that had been tested in previous studies, slightly modified for this study.<sup>11</sup> Implementation  
9 was approved by all Ministries of Cultural Affairs of the three involved states, and ethical  
10 approval was obtained from the Ethical Committee of the Medical Faculty of the University of  
11 Kiel (Ref.: D 417/08).  
12  
13  
14  
15  
16  
17  
18  
19  
20  
21  
22  
23

## 24 **Measures**

### 25 *Advertising exposure*

26  
27 Advertising exposure has been operationalized in numerous ways across studies.<sup>4</sup> It has  
28 been measured both in terms of the physical presence of advertisements in individuals'  
29 environments and in terms of the psychological processes underlying individuals' memories  
30 for these advertisements.<sup>12</sup> In the present study we approximated the individual advertising  
31 contact frequency by providing masked colored images of billboard ads for cigarettes and  
32 fixed-images of TV commercials for non-tobacco ads with all brand-identifying content  
33 digitally removed, asking the students to rate how often they have ever seen each ad extract  
34 (on a 4-point scale with scale points 0="Never," 1="1 to 4 times," 2="5 to 10 times" and  
35 3="More than 10 times"). The answers were post-coded as 0=0, 1=2.5, 2=7.5, and 3=11 and  
36 summed up to create the tobacco and non-tobacco ad scales, respectively.  
37  
38  
39  
40  
41  
42  
43  
44  
45  
46  
47  
48  
49

50  
51 The images included six cigarette brands, and eight "control" ads for products that included  
52 sweets, clothes, mobile phones, and cars. The following cigarette brands were included in  
53 the survey (with ad theme or cue in parentheses): (1) Marlboro (cowboy; horses); (2) F6  
54 (sunrise); (3) Gauloises (couple); (4) Pall Mall (Empire State Building); (5) L&M (couple); (6)  
55 Lucky Strike (cigarette packs). These six cigarette brands are among the eight most popular  
56  
57  
58  
59  
60

1  
2  
3 cigarette brands in Germany.<sup>13</sup> For other commercial products, the following ads were  
4 included in the survey (with product type and ad theme or cue in parentheses): (1) Jack  
5 Wolfskin (trekking-clothing; climber); (2) Volkswagen (car; the performer Seal); (3) Tic Tac  
6 (candy; elevator); (4) Dr. Best (tooth brush; tomato); (5) Kinder Pingui (chocolate bar;  
7 penguins); (6) T-Mobile (mobile phone; dog); (7) Spee (detergent; fox); (8) Toyota (car).  
8 Advertising selection was based on a pilot study on 28 tobacco and non-tobacco ads (110  
9 students aged 11 to 16 years, mean age 13.6 years), selecting the half of ads that revealed  
10 neither ceiling nor floor effects and had corrected item-test correlations above  $r_{it}=0.40$ .  
11  
12

13  
14  
15 We assessed ad exposure to non-tobacco products to control for the propensity to be  
16 receptive or attentive to advertising in general, which could confound the relation between  
17 tobacco-specific advertising exposure and smoking behavior.  
18  
19

### 20 21 22 *Smoking behavior* 23 24 25 26 27 28

29  
30 We assessed lifetime smoking experience by asking "How many cigarettes have you smoked  
31 in your life?" (never smoked, just a few puffs, 1-19 cigarettes, 20-100 cigarettes, >100  
32 cigarettes).<sup>14</sup> Students that indicated any smoking at baseline, even just a few puffs, were  
33 excluded from the analysis. Having smoked more than 100 cigarettes at the follow-up  
34 assessment was defined as being an established smoker. Current smoking frequency was  
35 measured by asking, "How often do you smoke at present?" to which respondents could  
36 answer, "I don't smoke," "less than once a month," "at least once a month, but not weekly,"  
37 "at least once a week, but not daily," or "daily." For the present analysis, this variable was  
38 dichotomized into daily and non-daily smoking. To account for different smoking susceptibility  
39 in never-smokers at baseline we also assessed future use intentions ("Do you think you will  
40 ever smoke in the future?") and refusal intentions ("If one of your friends offered you a  
41 cigarette, would you take it?"), with response categories "Definitely not", "Probably not",  
42 "Probably yes", and "Definitely yes".<sup>15</sup>  
43  
44  
45  
46  
47  
48  
49  
50  
51  
52  
53  
54  
55  
56  
57  
58  
59  
60

### *Covariates*

Covariate measures were derived from studies that focus on risk factors of adolescent tobacco use, to control for confounding variables that would be theoretically related to ad exposure and the smoking measures.<sup>16-18</sup>

Sociodemographics: age, gender, study region, and socioeconomic status (SES); SES of the students was approximated with a combination of student and class teacher ratings:

Students answered three items of the PISA cultural and social capital assessment,<sup>19</sup> asking for the number of books in the household (5-point scale from 0 = “None” to 4 = “More than 100”) and parenting characteristics (“My parents always know where I am” and “My parents know other parents from my school”), class teachers filled out an 11-item school evaluation sheet related to SES of their students (examples: “Most students of the school live in families with financial problems”, “Most students of the school come from underprivileged families”, “Our school has a good reputation”, scale range from 0 = “Not true at all” to 3 = “Totally true”, Cronbach’s alpha = 0.85); student and teacher ratings positively correlated  $r = 0.57$ , alpha = 0.72.

Personal characteristics: self-reported school performance (“How would you describe your grades last year?”, scale points “excellent”, “good”, “average”, “below average”); average TV screen time (“How many hours do you usually watch TV in your leisure time?”, scale points: “none”, “about half an hour”, “about an hour”, “about two hours”, “about three hours”, “about four hours”, “more than four hours a day”); rebelliousness and sensation-seeking, assessed with four items combined into a single index, with higher scores indicating greater propensity for rebelliousness and sensation seeking<sup>20</sup> (“I get in trouble in school”; “I do things my parents wouldn’t want me to do”; “I like scary things”; “I like to do dangerous things”, scale points 0 = “not at all like me”, 1 = “a little like me”, 2 = “pretty much like me”, and 3 = “exactly like me”, Cronbach’s alpha = 0.76).

1  
2  
3 Social environment: parent smoking (0 = “No”, 1 = “Yes, 2) and peer smoking (0 = “None”, 1  
4 = “Some, 2 = “Most”, 3 = “All”). As mentioned above, we also controlled for the adolescent’s  
5 ability to recall advertising in general with the non-tobacco ad scale.  
6  
7

### 8 9 **Statistical analysis**

10 All data analyses were conducted with Stata version 12.0 (Stata Corp, College Station, TX).

11  
12 Chi-squared tests and T-tests were performed to check whether subjects included in the  
13 analysis differed systematically from those not reached at the follow-up assessment.  
14

15 Bivariate associations between the study variables were analyzed using Spearman rank  
16 correlations. The multivariate associations between amount of advertising exposure and  
17 smoking initiation were analyzed with Poisson regressions. Poisson regression allows for the  
18 presentation of adjusted Incidence Rate Ratios (IRRs) and 95% confidence intervals (CIs) for  
19 the relationship between exposure to advertising and smoking at follow-up, having the  
20 advantage of not being influenced by the prevalence of the exposure. IRRs were calculated  
21 for every 10 advertising contacts, indicating the relative increase in smoking incidence  
22 (established smoking and daily smoking) for each additional 10 contacts. The dichotomized  
23 outcome variables were regressed on advertising exposure after inclusion of all covariates  
24 and with clustered robust standard errors to account for intra-class correlations within  
25 schools. In a subsequent analysis we repeated the Poisson regressions with advertising  
26 contact frequency being parsed into tertiles to account for the skewed distribution of tobacco  
27 advertising contact and to replicate the approach used in our previous analysis.<sup>9</sup> Missing  
28 data were handled by listwise deletion.  
29  
30  
31  
32  
33  
34  
35  
36  
37  
38  
39  
40  
41  
42  
43  
44  
45  
46  
47  
48  
49

## 50 **RESULTS**

### 51 52 **Descriptive statistics at baseline and attrition analysis**

53 Table 1 gives descriptive statistics for all interviewed never smokers at baseline, for those  
54 lost to follow-up, and the final analyzed sample, allowing comparisons of differences due to  
55  
56  
57  
58  
59  
60

attrition. Never smokers lost to follow-up were significantly younger of age, more often male, had lower scores on the SES scale, rated their school performance more poorly, had higher scores in sensation seeking/rebelliousness and more often reported at least one parent who smoked. No differences were found with regard to tobacco or non-tobacco advertising contact.

**Table 1.** Descriptive sample statistics at baseline and attrition analysis.

|                                            | Baseline never smokers<br>(n=2346)<br>% | Lost to follow-up<br>(n=1026)<br>% | Analyzed Sample<br>(n=1320)<br>% | p     |
|--------------------------------------------|-----------------------------------------|------------------------------------|----------------------------------|-------|
| <b>Sociodemographics</b>                   |                                         |                                    |                                  |       |
| Age at baseline, mean (SD)                 | 12.24 (1.01)                            | 12.16 (1.09)                       | 12.30 (0.93)                     | .001  |
| Gender: Female                             | 54.9                                    | 51.9                               | 57.3                             | .008  |
| SES: Below Median                          | 51.1                                    | 60.6                               | 43.8                             | <.001 |
| <b>State</b>                               |                                         |                                    |                                  |       |
| Schleswig-Holstein                         | 41.6                                    | 39.8                               | 43.0                             | .279  |
| Hamburg                                    | 28.4                                    | 29.1                               | 27.8                             |       |
| Brandenburg                                | 30.0                                    | 31.1                               | 29.2                             |       |
| <b>Personal characteristics</b>            |                                         |                                    |                                  |       |
| <b>School performance</b>                  |                                         |                                    |                                  |       |
| Below average                              | 2.5                                     | 3.7                                | 1.5                              | <.001 |
| Average                                    | 33.7                                    | 37.8                               | 30.6                             |       |
| Good                                       | 49.9                                    | 44.9                               | 53.9                             |       |
| Excellent                                  | 13.9                                    | 13.6                               | 14.0                             |       |
| <b>TV screen time</b>                      |                                         |                                    |                                  |       |
| ≤ 30 min                                   | 16.8                                    | 15.5                               | 17.8                             | .051  |
| 1-2 h                                      | 59.5                                    | 58.8                               | 60.1                             |       |
| 3-4 h                                      | 19.0                                    | 19.8                               | 18.3                             |       |
| > 4 h                                      | 4.7                                     | 5.9                                | 3.8                              |       |
| Sensation seeking and                      | 0.53 (0.50)                             | 0.56 (0.51)                        | 0.50 (0.49)                      | .010  |
| <b>Social environment</b>                  |                                         |                                    |                                  |       |
| Peer smoking: None                         | 71.7                                    | 71.5                               | 71.9                             | .858  |
| Parent smoking: No                         | 53.3                                    | 49.3                               | 56.4                             | .001  |
| <b>Advertising exposure</b>                |                                         |                                    |                                  |       |
| <b>Tobacco advertising, range 0-55</b>     |                                         |                                    |                                  |       |
| Low (< 1)                                  | 35.3                                    | 35.3                               | 35.4                             | .600  |
| Medium (1 - 10)                            | 38.7                                    | 39.7                               | 38.0                             |       |
| High (> 10)                                | 26.0                                    | 25.0                               | 26.6                             |       |
| <b>Non-tobacco advertising, range 0-88</b> |                                         |                                    |                                  |       |
| Low (< 35)                                 | 39.8                                    | 40.8                               | 39.0                             | .469  |
| Medium (35 – 54)                           | 32.1                                    | 32.4                               | 32.0                             |       |
| High (> 54)                                | 28.1                                    | 26.8                               | 29.0                             |       |

### Smoking initiation during the observational period

Thirty months after the baseline assessment 436 never smokers reported trying cigarette smoking including a few puffs (33% incidence rate), 138 reported smoking in the past 30 days (10.5% incidence rate), Sixty-six had smoked more than 100 cigarettes and were classified as established smokers (incidence rate 5%), and 58 reported daily smoking (incidence rate 4.4%). Daily smoking incidence was not significantly related to age ( $p=0.526$ ) or sex ( $p=0.153$ ), with 33% of the daily smokers at follow-up being 14 years of age or younger and 24% being 16 or older.

### Exposure to advertisements at baseline

**Table 2.** Contact frequency for tobacco and non-tobacco advertisements (n = 1320 never smokers at baseline)

|                                       | Seen at least<br>once<br>% | Seen more than<br>10 times<br>% |
|---------------------------------------|----------------------------|---------------------------------|
| <b>Tobacco ads (product type)</b>     |                            |                                 |
| Lucky Strike (cigarettes)             | 49                         | 13                              |
| Marlboro (cigarettes)                 | 28                         | 6                               |
| Pall Mall (cigarettes)                | 24                         | 6                               |
| Gauloises (cigarettes)                | 19                         | 2                               |
| L&M (cigarettes)                      | 18                         | 4                               |
| F6 (cigarettes)                       | 12                         | 1                               |
| <b>Non-tobacco ads (product type)</b> |                            |                                 |
| Kinder Pingui (sweet)                 | 96                         | 71                              |
| Tic Tac (candy)                       | 87                         | 44                              |
| Dr. Best (tooth brush)                | 83                         | 36                              |
| T-Mobile (mobile phone)               | 85                         | 35                              |
| Spee (detergent)                      | 76                         | 24                              |
| Volkswagen (car)                      | 50                         | 14                              |
| Toyota (car)                          | 54                         | 10                              |
| Jack Wolfskin (trekking-clothing)     | 45                         | 9                               |

Table 2 gives contact frequencies (how often the students had seen the ad) for all advertised products at baseline. The cigarette ad with the highest contact frequency was Lucky Strike, for which about half of the sample reported at least one contact. The lowest tobacco ad



1  
2  
3 contact frequency rate was found for F6, a regional German cigarette brand sold mainly in  
4 eastern Germany. Ad contact frequency for non-tobacco products was generally much higher  
5 than for tobacco products. For example, almost all students (96%) reported having seen the  
6 ad for Kinder Pingui, a chocolate bar. The range of the sum of contacts over all depicted  
7 advertisements was 0 to 55 (mean=7.9) for the tobacco ads, and 0 to 88 (mean=42.2) for the  
8 non-tobacco ads, also reflecting the lower number of tobacco ads (6 vs. 8).  
9  
10  
11  
12  
13

### 14 15 16 **Zero order associations**

17  
18  
19 Table 3 shows pairwise Spearman rank correlations between the study variables,  
20 demonstrating significant crude associations between the assessed covariates and smoking  
21 behavior as well as between covariates and advertising contact, justifying their inclusion in  
22 the multivariate analyses. The highest correlations with all smoking outcomes was found for  
23 peer smoking, followed by tobacco advertising contact. There were some differences in the  
24 correlational pattern between tobacco and non-tobacco advertising contact. Compared to the  
25 amount of contact with tobacco ads, non-tobacco advertising exposure was stronger related  
26 to age and showed no association with gender, and also had a stronger correlation with SES,  
27 TV screen time, and parental smoking. The zero-order correlation between tobacco and non-  
28 tobacco advertising contact indicated a proportion of about 20% shared variance.  
29  
30  
31  
32  
33  
34  
35  
36  
37  
38  
39

### 40 41 **Association between advertising contact and smoking initiation**

42  
43  
44 Figures 1a and 1b show the adjusted predictions of established smoking and daily smoking  
45 based on the amount of tobacco and non-tobacco advertising contact. The curves illustrate  
46 an increasing risk for the two smoking outcomes dependent on the amount of tobacco ad  
47 contact, but not for non-tobacco advertising contact.  
48  
49  
50  
51  
52  
53  
54

55  
56  
57  
58  
59  
60  
Insert Figures 1a and 1b about here

**Table 3.** Zero-order correlation matrix for all study variables.

|                                        | 1.             | 2.             | 3.              | 4.             | 5.             | 6.             | 7.             | 8.             | 9.             | 10.            | 11.            | 12.            | 13.            | 14.            |
|----------------------------------------|----------------|----------------|-----------------|----------------|----------------|----------------|----------------|----------------|----------------|----------------|----------------|----------------|----------------|----------------|
| 1. Age                                 | 1.00           |                |                 |                |                |                |                |                |                |                |                |                |                |                |
| 2. Gender<br>(0=female, 1=male)        | 0.02           | 1.00           |                 |                |                |                |                |                |                |                |                |                |                |                |
| 3. SES                                 | <b>-0.07*</b>  | 0.02           | 1.00            |                |                |                |                |                |                |                |                |                |                |                |
| 4. Region<br>(0=west, 1=east)          | <b>0.25***</b> | -0.01          | <b>-0.10*</b>   | 1.00           |                |                |                |                |                |                |                |                |                |                |
| 5. School<br>performance               | <b>0.11***</b> | 0.03           | <b>-0.16***</b> | -0.05          | 1.00           |                |                |                |                |                |                |                |                |                |
| 6. TV screen time                      | <b>0.17***</b> | <b>0.07**</b>  | <b>-0.30***</b> | <b>0.25***</b> | <b>0.15***</b> | 1.00           |                |                |                |                |                |                |                |                |
| 7. Sensation seeking                   | <b>0.09***</b> | <b>0.24***</b> | -0.03           | 0.01           | <b>0.16***</b> | <b>0.18***</b> | 1.00           |                |                |                |                |                |                |                |
| 8. Peer smoking                        | <b>0.28***</b> | 0.02           | <b>-0.22***</b> | <b>0.28***</b> | <b>0.15***</b> | <b>0.24***</b> | <b>0.24***</b> | 1.00           |                |                |                |                |                |                |
| 9. Parent smoking                      | 0.04           | -0.02          | <b>-0.26***</b> | <b>0.09***</b> | <b>0.11**</b>  | <b>0.22***</b> | <b>0.08**</b>  | <b>0.17***</b> | 1.00           |                |                |                |                |                |
| 10. Tobacco ad<br>exposure             | <b>0.14***</b> | <b>0.13***</b> | 0.02            | <b>-0.06*</b>  | 0.05           | <b>0.11**</b>  | <b>0.24***</b> | <b>0.13***</b> | <b>0.08**</b>  | 1.00           |                |                |                |                |
| 11. Non-tobacco ad<br>exposure         | <b>0.20***</b> | 0.05           | <b>-0.08**</b>  | <b>0.11**</b>  | <b>0.06*</b>   | <b>0.36***</b> | <b>0.21***</b> | <b>0.18***</b> | <b>0.18***</b> | <b>0.44***</b> | 1.00           |                |                |                |
| 12. Ever smoking                       | <b>0.15***</b> | 0.01           | <b>-0.17***</b> | <b>0.14***</b> | <b>0.09**</b>  | <b>0.14***</b> | <b>0.18***</b> | <b>0.24***</b> | <b>0.13***</b> | <b>0.19***</b> | <b>0.15***</b> | 1.00           |                |                |
| 13. Past 30 days<br>smoking            | <b>0.09**</b>  | -0.02          | <b>-0.12**</b>  | <b>0.08**</b>  | <b>0.06*</b>   | <b>0.12**</b>  | <b>0.15***</b> | <b>0.21***</b> | <b>0.14***</b> | <b>0.17***</b> | <b>0.12***</b> | <b>0.61***</b> | 1.00           |                |
| 14. Established<br>smoking (>100 cig.) | <b>0.07*</b>   | <b>0.09**</b>  | <b>-0.07*</b>   | <b>0.08**</b>  | 0.05           | <b>0.10*</b>   | <b>0.12**</b>  | <b>0.16***</b> | <b>0.09***</b> | <b>0.13***</b> | <b>0.09**</b>  | <b>0.33***</b> | <b>0.51***</b> | 1.00           |
| 15. Daily smoking                      | 0.02           | 0.04           | <b>-0.14***</b> | <b>0.08**</b>  | <b>0.07*</b>   | <b>0.10*</b>   | <b>0.09**</b>  | <b>0.14***</b> | <b>0.13***</b> | <b>0.08**</b>  | 0.03           | <b>0.30***</b> | <b>0.49***</b> | <b>0.75***</b> |

Bold figures == significant associations

\*p<0.05; \*\*p<0.01; \*\*\*p<0.001

1  
2  
3 The Figures also report the adjusted incidence rate ratios associated with an increase in  
4 advertising exposure. There was an adjusted IRR for established smoking of 1.38 (95% CI  
5 1.16, 1.63;  $p < 0.001$ ) for each additional 10 tobacco ad contacts and 1.00 (95% CI 0.84, 1.19;  
6  $p = 0.996$ ) for each additional 10 non-tobacco ad contacts. For daily smoking, the  
7  
8  
9  
10  
11  
12  
13  
14  
15  
16  
17  
18  
19  
20  
21  
22  
23  
24  
25  
26  
27  
28  
29  
30  
31  
32  
33  
34  
35  
36  
37  
38  
39  
40  
41  
42  
43  
44  
45  
46  
47  
48  
49  
50  
51  
52  
53  
54  
55  
56  
57  
58  
59  
60

Due to the skewed distribution of tobacco ad contact frequency (more than half of the never-smoking students had fewer than 10 contacts), we repeated the analysis using contact frequency parsed into tertiles, representing relative low (0-2.5), medium (5-10), and high (11-55) advertising contact. For established smoking the adjusted IRRs were 1.52 for tobacco ads (95% CI 1.14, 2.03;  $p = 0.004$ ) and 1.05 for non-tobacco ads (95% CI 0.68, 1.62;  $p = 0.819$ ). Using daily smoking as outcome variable the IRRs were 1.43 (95% CI 1.08, 1.90;  $p = 0.012$ ) and 0.84 (95% CI 0.58, 1.22;  $p = 0.363$ ) for each additional tertile of tobacco and non-tobacco advertising contact. These IRRs relate to 3.1%, 4.8%, and 7.3% established smoking attributable incidence rate or 3.1%, 4.6%, and 6.4% daily smoking incidence for low, medium, and high tobacco advertising contact, respectively, assuming the adjusted analysis adequately controlled for third variable influence.

To address the question if some never smokers had higher tobacco advertising contact because they were already more susceptible towards smoking at baseline, we conducted a sensitivity analysis with only never smokers with low susceptibility. These students reported **at baseline** that they will definitely never smoke in the future and **would** definitely not try cigarettes if a friend offered one ( $n = 803$ ). In this restricted sub-sample the adjusted IRR for each additional 10 tobacco ad contacts was 1.37 for established smoking (95% CI 1.07, 1.76;  $p = 0.012$ ) and 1.33 for daily smoking (95% CI 1.02, 1.75;  $p = 0.038$ ). Again, no significant associations were found for non-tobacco advertisings.

## DISCUSSION

This longitudinal study is a further test of the relationship between tobacco advertising exposure and youth smoking behavior, confirming the specificity of the advertising-smoking link by comparing the effects of tobacco versus non-tobacco advertising. The study extends previous work by using two less prevalent outcome measures (established and daily smoking) and a longer follow-up period of 2.5 years, measures likely to indicate an addiction component to the smoking.<sup>21</sup> Compared to the results reported on smoking initiation in terms of ever smoking (even a few puffs),<sup>9</sup> the increase in the adjusted relative risk for daily smoking dependent on tobacco advertising exposure was even more pronounced. Specificity was shown by the finding that tobacco advertising at baseline predicted these outcomes independent of the amount of general advertising contact and after controlling for a number of well-known risk factors for smoking initiation. This result confirms the content-specific association between tobacco advertising and smoking behaviour and underlines that tobacco advertising exposure is not simply a marker for adolescents that are generally more receptive or attentive towards marketing. In addition, a sub-sample sensitivity analysis revealed that the association between tobacco advertising exposure and smoking uptake was also found in the group of unsusceptible never smokers. This is important as one could argue that never smokers with higher exposure were already more susceptible towards smoking at baseline and therefore more attentive towards the tobacco ads.

This longitudinal study also clearly points out the implications of partial tobacco advertising bans in countries like the United States and Germany. The one-third of adolescents in the highest tertile of advertising had rates of daily and established smoking that were double (3 percentage points higher) than adolescents in the first tertile. In reverse, assuming that the models were fully adjusted for other confounding influences, one might expect a significant further decrease in youth smoking uptake in these countries after a total elimination of tobacco advertising.

1  
2  
3 Some limitations of the study have to be considered. There was a severe loss of students  
4 during the 30 months interval (44%). To a large degree the drop-out was due to  
5 organizational issues (e.g., school and class changes) that are unlikely systematically related  
6 to advertising exposure or smoking behavior on the individual level. However, the lost  
7 students differed on a couple of dimensions from the retained students, i.e., age, gender,  
8 socio-economic status, school performance, sensation seeking, and parental smoking. With  
9 the exception of the lower age, the drop-out markers indicate that lower risk adolescents  
10 were more likely to be retained. This might have biased the results as the effect of one risk  
11 factor might not be independent of other risk factors. Generally, one would assume that the  
12 associations get more conservative if higher risk adolescents are excluded, because this  
13 group has a higher likelihood of starting to smoke. However, in the context of media effects  
14 on smoking initiation there is also evidence that lower risk adolescents have a higher  
15 responsiveness towards media effects<sup>22,23</sup>, indicating that the present results might not be  
16 generalised to the whole population of adolescents. Second, as with any observational study,  
17 the results may be biased by unmeasured confounding – that is, an unmeasured risk factor  
18 could alter the estimates reported for the association between tobacco advertising and  
19 smoking onset. Third, the memory-based measure of ad exposure could be biased by  
20 memory effects other than the ones we controlled for. The potential to remember ads (in  
21 terms of contact frequency) should, however, not be completely independent of actual  
22 exposure. Finally, because the implemented method did not use a representative sample of  
23 all broadcasted ads, it does not allow for an accurate estimation of the total amount of  
24 tobacco and non-tobacco advertising exposure or the advertising pressure of specific brands.  
25 This is amplified by the modification of the stimulus material which did not contain any brand  
26 information.

27  
28  
29  
30  
31  
32  
33  
34  
35  
36  
37  
38  
39  
40  
41  
42  
43  
44  
45  
46  
47  
48  
49  
50  
51  
52  
53 The finding that exposure to tobacco advertising predicts smoking in youth could have  
54 important public health implications. A total ban of tobacco advertising and promotion around  
55 the world is one key policy measure of the WHO Framework Convention on Tobacco Control  
56 (FCTC)<sup>24</sup>. Under Article 13.1 of the FCTC, 'Parties recognize that a comprehensive ban on  
57  
58  
59  
60

1  
2  
3 advertising, promotion and sponsorship would reduce the consumption of tobacco products'.  
4  
5 Data from this study support this measure, because only exposure to tobacco  
6  
7 advertisements predicted smoking initiation, which cannot be attributed to a general  
8  
9 receptiveness to marketing and because it shows that advertising allowed under partial bans  
10  
11 is still reaching adolescents.  
12  
13  
14  
15  
16  
17  
18  
19  
20  
21  
22  
23  
24  
25  
26  
27  
28  
29  
30  
31  
32  
33  
34  
35  
36  
37  
38  
39  
40  
41  
42  
43  
44  
45  
46  
47  
48  
49  
50  
51  
52  
53  
54  
55  
56  
57  
58  
59  
60

For peer review only

## STATEMENTS

### Licence

The Corresponding Author has the right to grant on behalf of all authors and does grant on behalf of all authors, an exclusive licence (or non-exclusive for government employees) on a worldwide basis to the BMJ Group and co-owners or contracting owning societies (where published by the BMJ Group on their behalf), and its Licensees to permit this article (if accepted) to be published in BMJ and any other BMJ Group products and to exploit all subsidiary rights, as set out in our licence.

### Funding

This study was financed by DAK-Gesundheit, a German health insurance firm.

### Acknowledgement

We like to thank Mandy Gauditz, Lars Grabbe, Sven Heid, Frank Kirschneck, Carmen and Sarah Koynowski, Detlef Kraut, Corinna Liefeld, Karin Maruska, Danuta Meinhardt, Marc Räder, Jan Sängler, and Gesa Sander for assessing the data.

### Competing interests:

None.

### Contributors:

Conception and design of the study: All authors

Analysis and interpretation of data: MM, RH

1  
2  
3 Collection and assembly of data: MM, BI

4  
5 Drafting of the article: MM, JS, RH

6  
7 Critical revision of the article for important intellectual content: All authors

8  
9 Final approval of the article: All authors

10  
11  
12  
13  
14 All authors have full access to all of the data (including statistical reports and tables) in the  
15 study and can take responsibility for the integrity of the data and the accuracy of the data  
16 analysis.  
17  
18  
19

20  
21  
22  
23 Study implementation was approved by the Ethical Committee of the Medical Faculty of the  
24 University of Kiel (Ref.: D 417/08).  
25  
26  
27

28  
29  
30 **Data sharing:** No additional data available.  
31  
32  
33  
34  
35  
36  
37  
38  
39  
40  
41  
42  
43  
44  
45  
46  
47  
48  
49  
50  
51  
52  
53  
54  
55  
56  
57  
58  
59  
60



## References

- (1) Brandt AM. The cigarette century: The rise, fall and deadly persistence of the product that defined America. New York, NY: Basic Books; 2007.
- (2) Pollay RW. Targeting youth and concerned smokers: evidence from Canadian tobacco industry documents. *Tob Control* 2000; 9(2):136-147.
- (3) U.S. Department of Health and Human Services. Preventing tobacco use among youth and young adults: A report of the Surgeon General. Atlanta, GA: U.S. Department of Health and Human Services, Centers for Disease Control and Prevention, National Center for Chronic Disease Prevention and Health Promotion, Office on Smoking and Health; 2012.
- (4) Lovato C, Watts A, Stead LF. Impact of tobacco advertising and promotion on increasing adolescent smoking behaviours. *Cochrane Database Syst Rev* 2011;(10):CD003439.
- (5) Henriksen L. Comprehensive tobacco marketing restrictions: promotion, packaging, price and place. *Tob Control* 2012; 21(2):147-153.
- (6) Strasburger VC. Policy statement--children, adolescents, substance abuse, and the media. *Pediatrics* 2010; 126(4):791-799.
- (7) Hill AB. The environment and disease: association or causation? *Proc R Soc Med* 1965; 58:295-300.
- (8) Hanewinkel R, Isensee B, Sargent JD, Morgenstern M. Cigarette advertising and adolescent smoking. *Am J Prev Med* 2010; 38(4):359-366.
- (9) Hanewinkel R, Isensee B, Sargent JD, Morgenstern M. Cigarette advertising and teen smoking initiation. *Pediatrics* 2011; 127(2):e271-e278.
- (10) Kenford SL, Wetter DW, Welsch SK, Smith SS, Fiore MC, Baker TB. Progression of college-age cigarette samplers: what influences outcome. *Addict Behav* 2005; 30(2):285-294.
- (11) Galanti MR, Siliquini R, Cuomo L, Melero JC, Panella M, Faggiano F. Testing anonymous link procedures for follow-up of adolescents in a school-based trial: The EU-DAP pilot study. *Prev Med* 2007; 44(2):174-177.
- (12) Klitzner M, Gruenewald PJ, Bamberger E. Cigarette advertising and adolescent experimentation with smoking. *Br J Addict* 1991; 86(3):287-298.
- (13) Deutsches Krebsforschungszentrum. The Tobacco Atlas Germany 2009. Heidelberg: Deutsches Krebsforschungszentrum (in German); 2009.
- (14) Bondy SJ, Victor JC, Diemert LM. Origin and use of the 100 cigarette criterion in tobacco surveys. *Tob Control* 2009; 18(4):317-323.

- 1  
2  
3 (15) Pierce JP, Choi WS, Gilpin EA, Merritt RK, Farkas AJ. Validation of susceptibility as a  
4 predictor of which adolescents take up smoking in the United States. *Health Psychol*  
5 1996; 15:355-361.  
6  
7 (16) Gibbons FX, Gerrard M. Predicting young adults' health risk behavior. *J Pers Soc*  
8 *Psychol* 1995; 69(3):505-517.  
9  
10 (17) Hawkins JD, Catalano RF, Miller JY. Risk and protective factors for alcohol and other  
11 drug problems in adolescence and early adulthood: implications for substance abuse  
12 prevention. *Psychol Bull* 1992; 112(1):64-105.  
13  
14 (18) Petraitis J, Flay BR, Miller TQ. Reviewing theories of adolescent substance use:  
15 organizing pieces in the puzzle. *Psychol Bull* 1995; 117(1):67-86.  
16  
17 (19) Kunter M, Schümer G, Artelt C, Baumert J, Klieme E, Neubrand M et al. Pisa 2000:  
18 Dokumentation der Erhebungsinstrumente (Pisa 2000: Documentation of measures).  
19 Berlin: Max-Planck-Institut für Bildungsforschung (in German); 2002.  
20  
21 (20) Russo MF, Stokes GS, Lahey BB, Christ MAG, McBurnett K, Loeber R et al. A  
22 sensation seeking scale for children: Further refinement and psychometric  
23 development. *J Psychopathol Behav Assess* 1993; 15:69-85.  
24  
25 (21) Sargent JD, Mott LA, Stevens M. Predictors of smoking cessation in adolescents.  
26 *Arch Pediatr Adolesc Med* 1998; 152(4):388-393.  
27  
28 (22) Dalton MA, Sargent JD, Beach ML, Titus-Ernstoff L, Gibson JJ, Ahrens MB et al.  
29 Effect of viewing smoking in movies on adolescent smoking initiation: a cohort study.  
30 *Lancet* 2003; 362(9380):281-285.  
31  
32 (23) Hanewinkel R, Sargent JD. Exposure to smoking in internationally distributed  
33 American movies and youth smoking in Germany: a cross-cultural cohort study.  
34 *Pediatrics* 2008; 121(1):e108-e117.  
35  
36 (24) Shibuya K, Ciecierski C, Guindon E, Bettcher DW, Evans DB, Murray CJ. WHO  
37 Framework Convention on Tobacco Control: development of an evidence based  
38 global public health treaty. *BMJ* 2003; 327(7407):154-157.  
39  
40  
41  
42  
43  
44  
45  
46  
47  
48  
49  
50  
51  
52  
53  
54  
55  
56  
57  
58  
59  
60

1  
2  
3 **Figure legend**  
4  
5  
6  
7

8 **Figures 1a and 1b**

9  
10 ----- Tobacco advertising      — Non-tobacco advertising

11 IRR = Incidence Rate Ratio for 10 additional advertising contacts

12 Figures in brackets = 95% Confidence Interval

13 n.s. = not significant; \* $p < .05$ ; \*\*\* $p < .001$   
14  
15  
16  
17  
18  
19  
20  
21  
22  
23  
24  
25  
26  
27  
28  
29  
30  
31  
32  
33  
34  
35  
36  
37  
38  
39  
40  
41  
42  
43  
44  
45  
46  
47  
48  
49  
50  
51  
52  
53  
54  
55  
56  
57  
58  
59  
60

1  
2  
3  
4  
5  
6  
7  
8  
9  
10  
11  
12  
13  
14  
15  
16  
17  
18  
19  
20  
21  
22  
23  
24  
25  
26  
27  
28  
29  
30  
31  
32  
33  
34  
35  
36  
37  
38  
39  
40  
41  
42  
43  
44  
45  
46  
47  
48  
49  
50  
51  
52  
53  
54  
55  
56  
57  
58  
59  
60

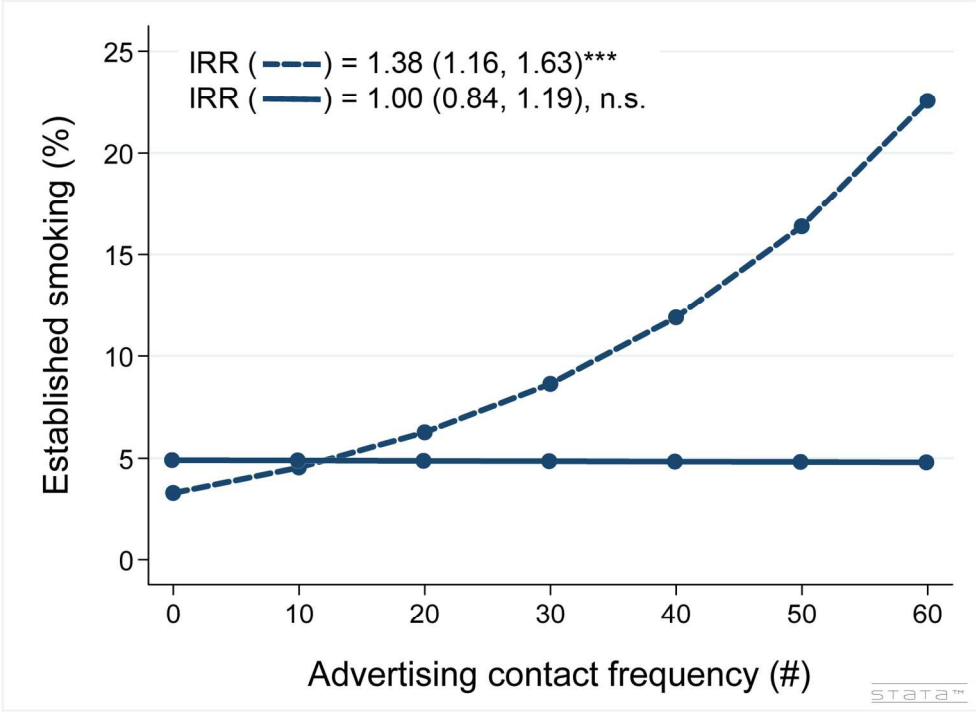

143x104mm (300 x 300 DPI)

View only



143x104mm (300 x 300 DPI)

view only

1  
2  
3  
4  
5  
6  
7  
8  
9  
10  
11  
12  
13  
14  
15  
16  
17  
18  
19  
20  
21  
22  
23  
24  
25  
26  
27  
28  
29  
30  
31  
32  
33  
34  
35  
36  
37  
38  
39  
40  
41  
42  
43  
44  
45  
46  
47  
48  
49  
50  
51  
52  
53  
54  
55  
56  
57  
58  
59  
60

**STROBE statement**

Manuscript entitled "From never to daily smoking in 30 months:  
The predictive value of tobacco and non-tobacco advertising exposure"

|                           | <b>Item No</b> | <b>Recommendation</b>                                                                                                                                                                | <b>Manuscript page</b> |
|---------------------------|----------------|--------------------------------------------------------------------------------------------------------------------------------------------------------------------------------------|------------------------|
| <b>Title and abstract</b> |                |                                                                                                                                                                                      |                        |
|                           | 1              | (a) Indicate the study's design with a commonly used term in the title or the abstract                                                                                               | 2                      |
|                           |                | (b) Provide in the abstract an informative and balanced summary of what was done and what was found                                                                                  | 2                      |
| <b>Introduction</b>       |                |                                                                                                                                                                                      |                        |
| Background/rationale      | 2              | Explain the scientific background and rationale for the investigation being reported                                                                                                 | 4                      |
| Objectives                | 3              | State specific objectives, including any prespecified hypotheses                                                                                                                     | 4, 5                   |
| <b>Methods</b>            |                |                                                                                                                                                                                      |                        |
| Study design              | 4              | Present key elements of study design early in the paper                                                                                                                              | 6                      |
| Setting                   | 5              | Describe the setting, locations, and relevant dates, including periods of recruitment, exposure, follow-up, and data collection                                                      | 6                      |
| Participants              | 6              | (a) Give the eligibility criteria, and the sources and methods of selection of participants. Describe methods of follow-up                                                           | 6                      |
| Variables                 | 7              | Clearly define all outcomes, exposures, predictors, potential confounders, and effect modifiers. Give diagnostic criteria, if applicable                                             | 7,8,9                  |
| Data sources/measurement  | 8*             | For each variable of interest, give sources of data and details of methods of assessment (measurement). Describe comparability of assessment methods if there is more than one group | 7,8,9                  |
| Bias                      | 9              | Describe any efforts to address potential sources of bias                                                                                                                            | 9                      |
| Study size                | 10             | Explain how the study size was arrived at                                                                                                                                            | 6                      |
| Quantitative variables    | 11             | Explain how quantitative variables were handled in the analyses. If applicable, describe which groupings were chosen and why                                                         | 7-9                    |
|                           |                | (a) Describe all statistical methods, including those used to control for confounding                                                                                                | 9, 10                  |
|                           |                | (b) Describe any methods used to examine subgroups and interactions                                                                                                                  | n/a                    |
| Statistical methods       | 12             | (c) Explain how missing data were addressed                                                                                                                                          | 10                     |
|                           |                | (d) If applicable, explain how loss to follow-up was addressed                                                                                                                       | 10                     |
|                           |                | (e) Describe any sensitivity analyses                                                                                                                                                | 10                     |

| <b>Results</b>           |     |                                                                                                                                                                                                              |                       |
|--------------------------|-----|--------------------------------------------------------------------------------------------------------------------------------------------------------------------------------------------------------------|-----------------------|
| Participants             | 13* | (a) Report numbers of individuals at each stage of study? eg numbers potentially eligible, examined for eligibility, confirmed eligible, included in the study, completing follow-up, and analysed           | 6                     |
|                          |     | (b) Give reasons for non-participation at each stage                                                                                                                                                         | 6                     |
|                          |     | (c) Consider use of a flow diagram                                                                                                                                                                           | --                    |
| Descriptive data         | 14* | (a) Give characteristics of study participants (eg demographic, clinical, social) and information on exposures and potential confounders                                                                     | Table 1               |
|                          |     | (b) Indicate number of participants with missing data for each variable of interest                                                                                                                          | Table 1               |
|                          |     | (c) Summarise follow-up time (eg, average and total amount)                                                                                                                                                  | 6                     |
| Outcome data             | 15* | Report numbers of outcome events or summary measures over time                                                                                                                                               | 10                    |
| Main results             | 16  | (a) Give unadjusted estimates and, if applicable, confounder-adjusted estimates and their precision (eg, 95% confidence interval). Make clear which confounders were adjusted for and why they were included | 8, 13, 15<br>Figure 1 |
|                          |     | (b) Report category boundaries when continuous variables were categorized                                                                                                                                    | 15                    |
|                          |     | (c) If relevant, consider translating estimates of relative risk into absolute risk for a meaningful time period                                                                                             | --                    |
| Other analyses           | 17  | Report other analyses done? eg analyses of subgroups and interactions, and sensitivity analyses                                                                                                              | --                    |
| <b>Discussion</b>        |     |                                                                                                                                                                                                              |                       |
| Key results              | 18  | Summarise key results with reference to study objectives                                                                                                                                                     | 16                    |
| Limitations              | 19  | Discuss limitations of the study, taking into account sources of potential bias or imprecision. Discuss both direction and magnitude of any potential bias                                                   | 16,17                 |
| Interpretation           | 20  | Give a cautious overall interpretation of results considering objectives, limitations, multiplicity of analyses, results from similar studies, and other relevant evidence                                   | 16,17                 |
| Generalisability         | 21  | Discuss the generalisability (external validity) of the study results                                                                                                                                        | 17                    |
| <b>Other information</b> |     |                                                                                                                                                                                                              |                       |
| Funding                  | 22  | Give the source of funding and the role of the funders for the present study and, if applicable, for the original study on which the present article is based                                                | 18                    |
